# Supplementary material
Source: publisher figshare collection journal article supplement (https://acs.figshare.com/ndownloader/files/3861157)
Supplement: Supplementary file 1 [file 3861157]

# Synthesis, Spectral and Electrochemical Studies of Electronically Tunable $\beta$ -Substituted Porphyrins with Mixed Substituent Pattern

*Ravi Kumar and Muniappan Sankar\**

Department of Chemistry, Indian Institute of Technology Roorkee, Roorkee-247667, India

## Supporting Information

### Table of Contents (TOC)

**Figure S1.** The ORTEP diagrams showing top and side views of NiTPP(NO<sub>2</sub>)(Th)<sub>2</sub>(Py) (**1a** and **1b**), ZnTPP(NO<sub>2</sub>)(PE)<sub>2</sub>(CH<sub>3</sub>OH) (**1d** and **1e**) and ZnTPP(NO<sub>2</sub>)Br<sub>2</sub>(CH<sub>3</sub>OH) (**1g** and **1h**). The solvates are not shown for clarity, and in side view, the  $\beta$ -substituents and *meso*-phenyl groups are not shown for clarity. The displacement of porphyrin-core atoms in Å from the mean plane are shown in figures **1c**, **1f** and **1i** for NiTPP(NO<sub>2</sub>)(Th)<sub>2</sub>(Py), ZnTPP(NO<sub>2</sub>)(PE)<sub>2</sub>(CH<sub>3</sub>OH) and ZnTPP(NO<sub>2</sub>)Br<sub>2</sub>, respectively.

**Figure S2.** B3LYP/LanL2DZ optimised geometries showing top as well as side views of **H<sub>2</sub>TPP(NO<sub>2</sub>)(CN)<sub>2</sub>** (**1a** and **1b**) and **H<sub>2</sub>TPP(NO<sub>2</sub>)(PE)<sub>2</sub>** (**1d** and **1e**), respectively. In side view, the  $\beta$ -substituents and *meso*-phenyl groups are not shown for clarity. The displacement of porphyrin-core atoms in Å from the mean plane are shown in figures **1c** and **1f** for **H<sub>2</sub>TPP(NO<sub>2</sub>)(CN)<sub>2</sub>** and **H<sub>2</sub>TPP(NO<sub>2</sub>)(PE)<sub>2</sub>**, respectively. Color codes for atoms: C (black), N (blue) and O (red).

**Figure S3.** B3LYP/LanL2DZ optimised geometries showing top as well as side views of **H<sub>2</sub>TPP(NO<sub>2</sub>)Ph<sub>2</sub>** (**1a** and **1b**) and **H<sub>2</sub>TPP(NO<sub>2</sub>)Br<sub>2</sub>** (**1d** and **1e**), respectively. In side view, the  $\beta$ -substituents and *meso*-phenyl groups are not shown for clarity. The displacement of porphyrin-core atoms in Å from the mean plane are shown in figures **1c** and **1f** for **H<sub>2</sub>TPP(NO<sub>2</sub>)Ph<sub>2</sub>** and **H<sub>2</sub>TPP(NO<sub>2</sub>)Br<sub>2</sub>**, respectively. Color codes for atoms: C (black), N (blue), O (red) and Br (brown).

**Figure S4.** B3LYP/LanL2DZ optimised geometries showing top as well as side views of **H<sub>2</sub>TPP(NO<sub>2</sub>)(PE)<sub>6</sub>** (**1a** and **1b**) and **H<sub>2</sub>TPP(NO<sub>2</sub>)Ph<sub>6</sub>** (**1d** and **1e**), respectively. In side view, the

$\beta$ -substituents and *meso*-phenyl groups are not shown for clarity. The displacement of porphyrin-core atoms in Å from the mean plane are shown in figures **1c** and **1f** for **H<sub>2</sub>TPP(NO<sub>2</sub>)(PE)<sub>6</sub>** and **H<sub>2</sub>TPP(NO<sub>2</sub>)Ph<sub>6</sub>**, respectively. Color codes for atoms: C (black), N (blue) and O (red).

**Figure S5.** Electronic absorption spectra of H<sub>2</sub>TPP(NO<sub>2</sub>)X<sub>2</sub> (X = H, CN, PE) derivatives in CH<sub>2</sub>Cl<sub>2</sub> at 298 K. Q bands are magnified 3 times.

**Figure S6.** UV- Visible spectra of H<sub>2</sub>TPP(NO<sub>2</sub>)X<sub>6</sub> (X = H, Ph, Th, PE) derivatives in CH<sub>2</sub>Cl<sub>2</sub> at 298 K. Q bands are magnified 3 times.

**Figure S7.** Fluorescence spectra of H<sub>2</sub>TPP(NO<sub>2</sub>)Th<sub>n</sub> (n = 0, 2, 6) in CH<sub>2</sub>Cl<sub>2</sub> at 298 K.

**Figure S8.** Emission spectra of (a) MTPP(NO<sub>2</sub>)(CN)<sub>2</sub> and (b) MTPP(NO<sub>2</sub>)(C<sub>6</sub>H<sub>5</sub>)<sub>2</sub>, where M = 2H and Zn(II) in CH<sub>2</sub>Cl<sub>2</sub> at 298 K.

**Figure S9.** Fluorescence spectra of (a) MTPP(NO<sub>2</sub>)(PE)<sub>2</sub> and (b) MTPP(NO<sub>2</sub>)(PE)<sub>6</sub> (M = 2H, Zn(II)) in CH<sub>2</sub>Cl<sub>2</sub> at 298 K.

**Figure S10.** <sup>1</sup>H NMR spectrum of H<sub>2</sub>TPP(NO<sub>2</sub>)Br<sub>2</sub> in CDCl<sub>3</sub> at 298 K.

**Figure S11.** <sup>1</sup>H NMR spectrum of NiTPP(NO<sub>2</sub>)Br<sub>2</sub> in CDCl<sub>3</sub>.

**Figure S12.** <sup>1</sup>H NMR spectrum of ZnTPP(NO<sub>2</sub>)Br<sub>2</sub> in CDCl<sub>3</sub>.

**Figure S13.** <sup>1</sup>H NMR spectrum of H<sub>2</sub>TPP(NO<sub>2</sub>)Ph<sub>2</sub> in CDCl<sub>3</sub>.

**Figure S14.** <sup>1</sup>H NMR spectrum of NiTPP(NO<sub>2</sub>)Ph<sub>2</sub> in CDCl<sub>3</sub>.

**Figure S15.** <sup>1</sup>H NMR spectrum of ZnTPP(NO<sub>2</sub>)Ph<sub>2</sub> in CDCl<sub>3</sub>.

**Figure S16.** <sup>1</sup>H NMR spectrum of H<sub>2</sub>TPP(NO<sub>2</sub>)(PE)<sub>2</sub> in CDCl<sub>3</sub>.

**Figure S17.** <sup>1</sup>H NMR spectrum of H<sub>2</sub>TPP(NO<sub>2</sub>)Th<sub>2</sub> in CDCl<sub>3</sub>.

**Figure S18.** <sup>1</sup>H NMR spectrum of NiTPP(NO<sub>2</sub>)Th<sub>2</sub> in CDCl<sub>3</sub>.

**Figure S19.** <sup>1</sup>H NMR spectrum of ZnTPP(NO<sub>2</sub>)Th<sub>2</sub> in CDCl<sub>3</sub>.

**Figure S20.** <sup>1</sup>H NMR spectrum of H<sub>2</sub>TPP(NO<sub>2</sub>)(CN)<sub>2</sub> in CDCl<sub>3</sub>.

**Figure S21.** <sup>1</sup>H NMR spectrum of NiTPP(NO<sub>2</sub>)(CN)<sub>2</sub> in CDCl<sub>3</sub>.

**Figure S22.** <sup>1</sup>H NMR spectrum of ZnTPP(NO<sub>2</sub>)(CN)<sub>2</sub> in CDCl<sub>3</sub>.

**Figure S23.** <sup>1</sup>H NMR spectrum of NiTPP(NO<sub>2</sub>)Br<sub>6</sub> in CDCl<sub>3</sub>.

**Figure S24.** <sup>1</sup>H NMR spectrum of ZnTPP(NO<sub>2</sub>)Br<sub>6</sub> in CDCl<sub>3</sub>.

**Figure S25.** <sup>1</sup>H NMR spectrum of NiTPP(NO<sub>2</sub>)Ph<sub>6</sub> in CDCl<sub>3</sub>.

**Figure S26.** <sup>1</sup>H NMR spectrum of ZnTPP(NO<sub>2</sub>)Ph<sub>6</sub> in CDCl<sub>3</sub>.

**Figure S27.** <sup>1</sup>H NMR spectrum of H<sub>2</sub>TPP(NO<sub>2</sub>)(PE)<sub>6</sub> in CDCl<sub>3</sub>.

**Figure S28.**  $^1\text{H}$  NMR spectrum of  $\text{NiTPP}(\text{NO}_2)(\text{PE})_6$  in  $\text{CDCl}_3$ .

**Figure S29.**  $^1\text{H}$  NMR spectrum of  $\text{ZnTPP}(\text{NO}_2)(\text{PE})_6$  in  $\text{CDCl}_3$ .

**Figure S30.** UV-Visible spectral changes during titration of 2-9 with TFA, inset shows Hill plot

**Figure S31.** UV-Visible spectral changes during titration of TBAOH, inset shows Hill plot

**Figure S32.** UV-Visible spectral changes of Co(II) porphyrins upon addition of *tert*-butyl hydroperoxide (conversion of Co(II) to Co(III) porphyrins) in  $\text{CH}_2\text{Cl}_2$  at 298 K.

**Figure S33.** Cyclic voltammograms of (a)  $\text{H}_2\text{TPP}(\text{NO}_2)\text{X}_2$ , (b)  $\text{NiTPP}(\text{NO}_2)\text{X}_2$ , (c)  $\text{ZnTPP}(\text{NO}_2)\text{X}_2$ , (d)  $\text{CoTPP}(\text{NO}_2)\text{X}_2$  (where  $\text{X} = \text{H}, \text{Br}_2, (\text{CN})_2, (\text{PE})_2, \text{Th}_2, \text{Ph}_2$ ) complexes in  $\text{CH}_2\text{Cl}_2$ .

**Figure S34.** Cyclic voltammograms of (a)  $\text{H}_2\text{TPP}(\text{NO}_2)\text{X}_6$ , (b)  $\text{NiTPP}(\text{NO}_2)\text{X}_6$ , (c)  $\text{ZnTPP}(\text{NO}_2)\text{X}_6$ , (d)  $\text{CoTPP}(\text{NO}_2)\text{X}_6$  (where  $\text{X} = \text{H}, \text{Br}, \text{CN}, \text{PE}, \text{Th}, \text{Ph}$ ) complexes in  $\text{CH}_2\text{Cl}_2$ .

**Figure S35.** Cyclic voltammograms of (a)  $\text{MTPP}(\text{NO}_2)(\text{PE})_2$ , (b)  $\text{MTPP}(\text{NO}_2)(\text{PE})_6$  where  $\text{M} = 2\text{H}, \text{Cu(II)}, \text{Zn(II)}, \text{Ni(II)},$  and  $\text{Co(II)}$  in  $\text{CH}_2\text{Cl}_2$ .

**Figure S36.** Cyclic voltammograms of (a)  $\text{MTPP}(\text{NO}_2)\text{Th}_2$ , (b)  $\text{MTPP}(\text{NO}_2)\text{Th}_6$  where  $\text{M} = 2\text{H}, \text{Cu(II)}, \text{Zn(II)}, \text{Ni(II)},$  and  $\text{Co(II)}$  in  $\text{CH}_2\text{Cl}_2$ .

**Figure S37.** The HOMO-LUMO variation of  $\text{CuTPP}(\text{NO}_2)\text{X}_2$  where  $\text{X} = \text{PE}, \text{Br}, \text{Ph}$  and  $\text{Th}$  in comparison to  $\text{CuTPP}(\text{NO}_2)$  and  $\text{CuTPP}$ .

**Figure S38.** Plot of 1<sup>st</sup> ring redox potentials *versus* the Hammett parameter ( $\sigma_p$ ) of various Mixed substituted Porphyrins.

**Table S1.** Crystal structure data of  $\text{NiTPP}(\text{NO}_2)(\text{Ph})_2(\text{Pyridine})$  (**1**),  $\text{ZnTPP}(\text{NO}_2)(\text{PE})_2(\text{CH}_3\text{OH})$  (**2**),  $\text{ZnTPP}(\text{NO}_2)\text{Br}_2(\text{CH}_3\text{OH})$  (**3**),  $\text{NiTPP}(\text{NO}_2)\text{Br}_6$  (**4**), and  $\text{H}_2\text{TPP}(\text{NO}_2)(\text{Th})_2$  (**5**).

**Table S2.** Selected bond lengths and bond angles of  $\text{NiTPP}(\text{NO}_2)\text{Ph}_2(\text{Py})$  (**1**),  $\text{ZnTPP}(\text{NO}_2)(\text{PE})_2(\text{MeOH})$  (**2**),  $\text{ZnTPP}(\text{NO}_2)\text{Br}_2(\text{MeOH})$  (**3**),  $\text{NiTPP}(\text{NO}_2)\text{Br}_6$  (**4**) and  $\text{H}_2\text{TPP}(\text{NO}_2)(\text{Th})_2$  (**5**).

**Table S3.** Selected bond lengths ( $\text{\AA}$ ) and bond angles ( $^\circ$ ) for the B3LYP/LanLD2Z optimised geometries of  $\text{H}_2\text{TPP}(\text{NO}_2)\text{X}_2$  ( $\text{X} = \text{CN}, \text{PE}, \text{Br}, \text{Ph}$  and  $\text{Th}$ ).

**Table S4.** Selected bond lengths ( $\text{\AA}$ ) and bond angles ( $^\circ$ ) for the B3LYP/LanLD2Z optimised geometries of  $\text{H}_2\text{TPP}(\text{NO}_2)\text{X}_6$  ( $\text{X} = \text{PE}, \text{Br}, \text{Ph}$  and  $\text{Th}$ ).

**Table S5.** Optical absorption spectral data of metal complexes of mixed substituted porphyrins

**Table S6.** Fluorescence Spectral data of mixed substituted porphyrins

**Table S7.** Electrochemical redox data of various metal complexes of mixed substituted porphyrins in  $\text{CH}_2\text{Cl}_2$  containing 0.1 M TBAPF<sub>6</sub> with a scan rate of 0.1 V/s at 298 K.

**Table S8.** UV-Visible spectral data of Co(II) and Co(III) porphyrins in  $\text{CH}_2\text{Cl}_2$  at 298 K.

## Experimental Section

All commercially available chemicals were purchased from appropriate sources and used as received unless otherwise mentioned. Freshly recrystallised N-bromosuccinimide was used for bromination reactions. 2-nitro-12,13-dibromo-*meso*-tetraphenylporphyrin, 2-nitro-7,8,12,13,17,18-hexabromo-*meso*-tetraphenylporphyrinato copper(II) and its free base were synthesized by modified literature methods.<sup>1</sup> Mixed substituted porphyrins, ZnTPP(NO<sub>2</sub>)(PE)<sub>2</sub>, ZnTPP(NO<sub>2</sub>)Br<sub>2</sub>, and H<sub>2</sub>TPP(NO<sub>2</sub>)(Th)<sub>2</sub> were crystallized by the direct diffusion of CH<sub>3</sub>OH to a saturated porphyrin solution in CHCl<sub>3</sub> over a period of 10 - 15 days. X-ray quality single crystals of NiTPP(NO<sub>2</sub>)Ph<sub>2</sub> was obtained by direct diffusion of hexane to a saturated porphyrin solution in CHCl<sub>3</sub> containing a few drops of pyridine over a period of seven days. Crystal of NiTPP(NO<sub>2</sub>)Br<sub>6</sub> were obtained by vapor diffusion of hexane into the saturated solution of porphyrin in 1,2-dichloroethane containing a few drops of pyridine. The single crystals obtained were mounted on mounting loops. All diffraction data were collected by using a Bruker APEXII diffractometer at 25 °C equipped with graphite-monochromated Mo K $\alpha$  ( $\lambda$  = 0.71073 Å) by the  $\omega$ -2 $\theta$  scan. The structures were solved by direct methods by using SIR97 and SHELX-97.<sup>2</sup> Crystallographic data for these compounds are summarized in Table S1 in the supporting information. CCDC- 1018319 (NiTPP(NO<sub>2</sub>)Ph<sub>2</sub>), -1018393 (ZnTPP(NO<sub>2</sub>)(PE)<sub>2</sub>), - 1018509 (H<sub>2</sub>TPP(NO<sub>2</sub>)(Th)<sub>2</sub>), - 1019075 (ZnTPP(NO<sub>2</sub>)Br<sub>2</sub>), and -1019824 (NiTPP(NO<sub>2</sub>)Br<sub>6</sub>) contain the supplementary crystallographic data. The ground state geometries of mixed substituted free base porphyrins (H<sub>2</sub>TPP(NO<sub>2</sub>)X<sub>6</sub> and H<sub>2</sub>TPP(NO<sub>2</sub>)X<sub>2</sub>) were optimized in the gas phase by DFT calculations with B3LYP functional and LANL2DZ basis set using Gaussian 09.

UV-Vis absorption spectra were measured in distilled dichloromethane using Shimadzu UV-1800 spectrometer at 298 K. The fluorescence spectra were carried out using Hitachi F-4600 spectrofluorometer in CH<sub>2</sub>Cl<sub>2</sub>. All <sup>1</sup>H NMR measurements were performed using Bruker AVANCE 500 spectrometer in CDCl<sub>3</sub>. MALDI-TOF-MS spectra were measured using a Bruker UltrafleXtreme-TN MALDI-TOF/TOF spectrometer using dithranol as a matrix and ESI mass spectra were recorded using Bruker Daltanics-microTOF. The elemental analysis was carried out on Elementarvario EL III instrument. Cyclic voltammetric measurements were carried out using BAS Epsilon and CH 620E electrochemical workstation. A three electrode system was used and consisted of a Pt button working electrode (0.2 mm diameter), Ag/AgCl reference electrode and a Pt-wire counter electrode. The concentrations of all porphyrins employed were ~1 mM. All measurements were performed in triple distilled CH<sub>2</sub>Cl<sub>2</sub> solution which was purged with Ar gas, using 0.1 M TBAPF<sub>6</sub> as the supporting electrolyte.

The stoichiometry and binding constants for protonation were analyzed by Hill equation.<sup>3</sup>

$$\log[(A_n - A_0)/(A_f - A_n)] = \log \beta_2 + n \log[\text{TFA}]$$

The Hill plot was constructed by plotting  $\log[(A_n - A_0)/(A_f - A_n)]$  versus  $\log[\text{TFA}]$  where A<sub>0</sub> and A<sub>n</sub> are the absorbance values of porphyrin employed and protonated species, respectively at a given concentration of the TFA added. A<sub>f</sub> denotes the absorbance of the diprotonated species at a particular wavelength. The slope of the line (n) was found to be two for one-to-two stoichiometry between the porphyrin and the added TFA. The value of  $\log \beta_2$  is evaluated from the intercept of the line at  $\log[(A_n - A_0)/(A_f - A_n)] = 0.0$ . In the present study, the  $\log \beta_2$  values were evaluated by using a minimum of two wavelengths and an average value of n and  $\log \beta_2$  is reported. The similar methodology was employed for deprotonation studies also.

## I. Synthesis of MTPP(NO<sub>2</sub>)X<sub>2</sub> (X = Br, Ph, Th, PE and CN) derivatives:

### (a) Synthesis of 2-nitro-12,13-dibromo-*meso*-tetraphenylporphyrin<sup>1</sup> and its metal complexes

2-nitro-*meso*-tetraphenylporphyrin (0.220 g, 0.447 mmol, 1 equiv.) was taken in 45 mL of distilled CHCl<sub>3</sub>. To this, freshly recrystallized NBS (0.148 g, 1.119 mmol) was added and refluxed for 72 hrs. Solvent was rotary evaporated to dryness under vacuum. The crude porphyrin was purified on silica column using CHCl<sub>3</sub> as eluent. Yield was found to be 81% (0.220 g).

**H<sub>2</sub>TTP(NO<sub>2</sub>)Br<sub>2</sub>:** <sup>1</sup>H NMR in CDCl<sub>3</sub>:  $\delta$  (ppm) 8.97 (s, 1H,  $\beta$ -pyrrole-H), 8.84 (t, 3H,  $J$  = 5 Hz,  $\beta$ -pyrrole-H), 8.78 (d, 1H,  $J$  = 4.5 Hz,  $\beta$ -pyrrole-H), 8.28 (d, 2H,  $J$  = 7 Hz, *meso*-*o*-phenyl-H), 8.22 (d, 2H,  $J$  = 7 Hz *meso*-*o*-phenyl-H), 8.16 (t, 4H,  $J$  = 8.5 Hz, *meso*-*o*-phenyl-H), 7.85-7.70 (m, 12H, *meso*-*m*- and *p*-phenyl-H), -2.63 (bs, 1H, imino-H), -2.68 (bs, 1H, imino-H). ESI-MS (m/z): found 818.10 [M+H]<sup>+</sup>, calcd. 818.22. Anal. Calcd for C<sub>44</sub>H<sub>27</sub>N<sub>5</sub>O<sub>2</sub>Br<sub>2</sub>•0.5 CHCl<sub>3</sub>: C, 60.93; H, 3.16; N, 7.98%. Found: C, 60.69; H, 3.34; N, 7.66%.

H<sub>2</sub>TTP(NO<sub>2</sub>)Br<sub>2</sub> (0.0183mmol) was dissolved in 10 mL of CHCl<sub>3</sub>. To this, 10 equiv. of M(OAc)<sub>2</sub>•nH<sub>2</sub>O (M = Cu(II), Zn(II), Co(II), 10 equiv.) in 2 mL of methanol was added and refluxed for 40 minutes and then cooled to room temperature, washed with water, dried over anhydrous sodium sulphate. The crude product was purified by column chromatography on silica column using CHCl<sub>3</sub> as eluent. Further, Ni(II) complexes were prepared by refluxing H<sub>2</sub>TTP(NO<sub>2</sub>)Br<sub>2</sub> and Ni(OAc)<sub>2</sub>•2H<sub>2</sub>O (10 equiv.) in DMF<sup>22</sup> for 2 hours followed by the precipitation with water. The crude product was purified on silica column using CHCl<sub>3</sub> as eluent. Yield was found to be 80 - 90%.

**NiTTP(NO<sub>2</sub>)Br<sub>2</sub>:** <sup>1</sup>H NMR in CDCl<sub>3</sub>:  $\delta$  (ppm) 8.90 (s, 1H,  $\beta$ -pyrrole-H), 8.64 (d, 1H,  $J$  = 5 Hz,  $\beta$ -pyrrole-H), 8.58 (d, 1H,  $J$  = 5 Hz,  $\beta$ -pyrrole-H), 8.51 (d, 1H,  $J$  = 4.5 Hz,  $\beta$ -pyrrole-H), 8.45 (d, 1H,  $J$  = 5 Hz,  $\beta$ -pyrrole-H), 8.02-7.92 (m, 4H, *meso*-*o*-phenyl-H), 7.85 (d, 4H,  $J$  = 6.5 Hz, *meso*-*o*-phenyl-H), 7.75-7.59 (m, 12H, *meso*-*m*- and *p*-phenyl-H). MALDI-TOF-MS (m/z): found 874.54 [M<sup>+</sup>], calcd. 874.22. Anal. Calcd for C<sub>44</sub>H<sub>25</sub>N<sub>5</sub>O<sub>2</sub>Br<sub>2</sub>Ni•2H<sub>2</sub>O: C, 58.38; H, 2.67; N, 7.73%. Found: C, 58.11; H, 2.80; N, 7.47%. **CuTTP(NO<sub>2</sub>)Br<sub>2</sub>:** MALDI-TOF-MS (m/z): found 879.48 [M<sup>+</sup>], calcd., 879.07. **ZnTTP(NO<sub>2</sub>)Br<sub>2</sub>:** <sup>1</sup>H NMR in CDCl<sub>3</sub>:  $\delta$  (ppm) 9.14 (s, 1H,  $\beta$ -pyrrole-H), 8.85 (dd, 2H,  $J_a$  = 8 Hz,  $J_b$  = 4.5 Hz  $\beta$ -pyrrole-H), 8.81-8.75 (m, 2H,  $\beta$ -pyrrole-H), 8.16 (t, 4H,  $J$  = 6 Hz, *meso*-*o*-phenyl-H), 8.03 (d, 4H,  $J$  = 6.5 Hz, *meso*-*o*-phenyl-H), 7.84-7.64 (m, 12H, *meso*-*m*- and *p*-phenyl-H). MALDI-TOF-MS (m/z): found 881.25 [M<sup>+</sup>], calcd. 880.91. **CoTTP(NO<sub>2</sub>)Br<sub>2</sub>:** ESI-MS (m/z): found 873.99 [M<sup>+</sup>], calcd. 874.46.

### (b) Synthesis of 2-nitro-12,13-diphenyl-*meso*-tetraphenylporphyrin and its metal complexes

Two-way stoppered RB flask was charged with H<sub>2</sub>TTP(NO<sub>2</sub>)Br<sub>2</sub> (0.16 g, 0.196 mmol), phenyl boronic acid (0.284 g, 2.33 mmol) and K<sub>2</sub>CO<sub>3</sub> (0.648 g, 4.68 mmol). To this, 50 mL of distilled toluene was added and purged with Ar gas for 10 minutes. Then Pd(PPh<sub>3</sub>)<sub>4</sub> (0.045 g, 0.039 mmol) was added under Ar and heated to 100 °C for 18 hrs. After completion of the reaction, the solvent was removed by rotary evaporation. The residue was redissolved in CHCl<sub>3</sub> (50 mL) and washed with saturated NaHCO<sub>3</sub> (50 ml) followed by 30% NaCl solution (50 ml). Finally, the organic

layer was dried over anhydrous Na<sub>2</sub>SO<sub>4</sub>. The crude product was purified on silica column using variant polarity from CHCl<sub>3</sub>/hexane mixture (3:1, v/v) to 100% CHCl<sub>3</sub> as eluent. The desired product was recrystallised from CHCl<sub>3</sub>/CH<sub>3</sub>OH mixture (1:3, v/v). The yield was found to be 0.130 g (71%).

**H<sub>2</sub>TPP(NO<sub>2</sub>)Ph<sub>2</sub>:** <sup>1</sup>H NMR in CDCl<sub>3</sub>:  $\delta$  (ppm) 8.98 (s, 1H,  $\beta$ -pyrrole-H), 8.81 (d, 1H,  $J$  = 5 Hz,  $\beta$ -pyrrole-H), 8.78 (d, 1H,  $J$  = 5 Hz,  $\beta$ -pyrrole-H), 8.58 (t, 2H,  $J$  = 5 Hz,  $\beta$ -pyrrole-H), 8.30 (dd, 2H,  $J$  = 7.5 Hz,  $J$  = 1.5 Hz, *meso-o*-phenyl-H), 8.23 (dd, 2H,  $J$  = 7.5 Hz,  $J$  = 1.5 Hz, *meso-o*-phenyl-H), 7.85 (d, 2H,  $J$  = 6.5 Hz, *meso-o*-phenyl-H), 7.80 (t, 5H,  $J$  = 8.0 Hz, *meso-o* and *m*-phenyl-H), 7.74 (d, 3H,  $J$  = 7.5 Hz, *meso-o* and *m*-phenyl-H), 7.33-7.21 (m, 6H, *meso-m*- and *p*-phenyl-H), 6.90-6.80 (m, 10H,  $\beta$ -pyrrolePh-H), -2.31 (bs, 1H, imino-H). ESI-MS (m/z): found 812.34 [M<sup>+</sup>], calcd. 812.39. Anal. Calcd for C<sub>56</sub>H<sub>37</sub>N<sub>5</sub>O<sub>2</sub>: C, 82.84; H, 4.59; N, 8.62%. Found: C, 82.98; H, 4.27; N, 8.34%.

The metal complexes were prepared with similar procedures of the corresponding metal complexes of MTPP(NO<sub>2</sub>)Br<sub>2</sub>. The yield was found to be 85 - 95%. **NiTPP(NO<sub>2</sub>)Ph<sub>2</sub>:** <sup>1</sup>H NMR in CDCl<sub>3</sub>:  $\delta$  (ppm) 8.92 (s, 1H,  $\beta$ -pyrrole-H), 8.54 (d, 1H,  $J$  = 5 Hz,  $\beta$ -pyrrole-H), 8.42 (d, 1H,  $J$  = 5 Hz,  $\beta$ -pyrrole-H), 8.29 (d, 1H,  $J$  = 5 Hz,  $\beta$ -pyrrole-H), 8.23 (d, 1H,  $J$  = 5 Hz,  $\beta$ -pyrrole-H), 8.00-7.94 (m, 4H, *meso-o*-phenyl-H), 7.73-7.58 (m, 6H, *meso-m*-phenyl-H), 7.48 (d, 2H,  $J$  = 7.0 Hz, *meso-o*-phenyl-H), 7.42 (d, 2H,  $J$  = 7.0 Hz, *meso-o*-phenyl-H), 7.19 (AB quartet, 2H,  $J$  = 8.0 Hz, *meso-m*-phenyl-H), 7.09 (t, 4H,  $J$  = 7.5 Hz, *meso-p*-phenyl-H), 6.95-6.76 (m, 10H,  $\beta$ -pyrrolePh-H). MALDI-TOF-MS (m/z): found 868.98 [M<sup>+</sup>], calcd. 868.62. Anal. Calcd for C<sub>56</sub>H<sub>35</sub>N<sub>5</sub>O<sub>2</sub>Ni·0.5CH<sub>3</sub>OH: C, 76.71; H, 4.22; N, 4.52%. Found: C, 76.98; H, 4.36; N, 4.74%. **ZnTPP(NO<sub>2</sub>)Ph<sub>2</sub>:** <sup>1</sup>H NMR in CDCl<sub>3</sub>:  $\delta$  (ppm) 9.12 (s, 1H,  $\beta$ -pyrrole-H), 8.80 (d, 1H,  $J$  = 5 Hz,  $\beta$ -pyrrole-H), 8.755 (d, 1H,  $J$  = 4.5 Hz,  $\beta$ -pyrrole-H), 8.53-8.51 (m, 2H,  $\beta$ -pyrrole-H), 8.21 (d, 2H,  $J$  = 7 Hz, *meso-o*-phenyl-H), 8.18 (d, 2H,  $J$  = 6.5 Hz, *meso-o*-phenyl-H), 7.80-7.70 (m, 8H, *meso-o*-phenyl-H), 7.67 (at, 2H,  $J$  = 7.5 Hz, *meso-m*-phenyl-H), 7.24-7.22 (m, 2H, *meso-m*-phenyl-H), 7.15 (dt, 4H,  $J$  = 7.5 Hz,  $J$  = 2.5 Hz, *meso-p*-phenyl-H), 6.93 (d, 4H,  $J$  = 7.5 Hz,  $\beta$ -pyrrolePh-*o*-H), 6.90-6.80 (m, 6H,  $\beta$ -pyrrolePh-*m*- and *p*-H). MALDI-TOF-MS (m/z): found 875.51 [M<sup>+</sup>], calcd. 875.32. Anal. Calcd for C<sub>56</sub>H<sub>35</sub>N<sub>5</sub>O<sub>2</sub>Zn: C, 76.84; H, 4.03; N, 8.00%. Found: C, 76.69; H, 4.04; N, 7.78%. **CuTPP(NO<sub>2</sub>)Ph<sub>2</sub>:** Anal. Calcd for C<sub>56</sub>H<sub>35</sub>N<sub>5</sub>O<sub>2</sub>Cu: C, 75.61; H, 4.34; N, 7.73%. Found: C, 75.52; H, 4.26; N, 7.44%. MALDI-TOF-MS (m/z): found 873.91 [M<sup>+</sup>], calcd. 873.47. **CoTPP(NO<sub>2</sub>)Ph<sub>2</sub>:** ESI-MS (m/z): found 868.23 [M<sup>+</sup>], calcd., 868.86.

### (c) Synthesis of 2-nitro-12,13-diphenylethynyl-*meso*-tetraphenylporphyrin and its metal complexes

H<sub>2</sub>TPP(NO<sub>2</sub>)Br<sub>2</sub> (0.3 g, 0.366 mmol), Pd(PPh<sub>3</sub>)<sub>4</sub> (0.084 g, 0.073 mmol) were dissolved in distilled 1,4-dioxane (90 mL) and purged with argon gas for 15 minutes. To this, tributyl(phenylethynyl)stannane (0.406 mL, 1.158 mmol) in 42 mL of degassed dioxane was added and heated to 80 °C for 3 hrs under argon atmosphere. After completion of the reaction, the solvent was removed by vacuum distillation. The crude porphyrin was redissolved in CHCl<sub>3</sub> (20 mL) and purified on silica column using variant polarity from CHCl<sub>3</sub>/hexane mixture (3:2, v/v) to 100% CHCl<sub>3</sub> as eluent. The desired product was recrystallised from CHCl<sub>3</sub>/CH<sub>3</sub>OH mixture (1:3, v/v) containing one drop of Et<sub>3</sub>N. The yield was found to be 0.210 g (73%).

**H<sub>2</sub>TPP(NO<sub>2</sub>)(PE)<sub>2</sub>:** <sup>1</sup>H NMR in CDCl<sub>3</sub>:  $\delta$  (ppm) 8.99 (s, 1H,  $\beta$ -pyrrole-H), 8.90 (d, 1H,  $J$  = 4.5 Hz,  $\beta$ -pyrrole-H), 8.86 (d, 1H,  $J$  = 5 Hz,  $\beta$ -pyrrole-H), 8.77 (d, 1H,  $J$  = 5.5 Hz,  $\beta$ -pyrrole-H), 8.76 (d, 1H,  $J$  = 5 Hz,  $\beta$ -pyrrole-H), 8.30-8.18 (m, 8H, *meso-o*-phenyl-H), 7.85-7.68 (m, 12H, *meso-m* and *p*-phenyl-H), 7.38-7.26 (m, 10H,  $\beta$ -pyrrole-PE-H), -2.51 (s, 1H, imino-H), -2.54 (s, 1H, imino-H). ESI-MS (m/z): found 860.27 [M<sup>+</sup>], calcd. 859.99. Anal. Calcd for C<sub>60</sub>H<sub>37</sub>N<sub>5</sub>O<sub>2</sub>·2H<sub>2</sub>O: C, 80.43; H, 4.61; N, 7.82%. Found: C, 80.83; H, 4.37; N, 7.83%. The metal complexes were prepared with similar procedures of the corresponding metal complexes of MTPP(NO<sub>2</sub>)Br<sub>2</sub> and the yields were found to be 80 - 85%.

**NiTPP(NO<sub>2</sub>)(PE)<sub>2</sub>:** <sup>1</sup>H NMR in CDCl<sub>3</sub>:  $\delta$  (ppm) 8.91 (s, 1H,  $\beta$ -pyrrole-H), 8.61 (d, 1H,  $J$  = 5 Hz,  $\beta$ -pyrrole-H), 8.60 (d, 1H,  $J$  = 5.5 Hz,  $\beta$ -pyrrole-H), 8.52 (d, 1H,  $J$  = 5 Hz,  $\beta$ -pyrrole-H), 8.45 (d, 1H,  $J$  = 5 Hz,  $\beta$ -pyrrole-H), 8.02-7.94 (m, 8H, *meso-o*-phenyl-H), 7.75-7.58 (m, 12H, *meso-m* and *p*-phenyl-H), 7.33-7.26 (m, 10H,  $\beta$ -pyrrole-PE-H). MALDI-TOF-MS (m/z): found 917.02 [M<sup>+</sup>], calcd. 916.66. Anal. Calcd for C<sub>60</sub>H<sub>35</sub>N<sub>5</sub>O<sub>2</sub>Ni: C, 78.62; H, 3.85; N, 7.64%. Found: C, 78.58; H, 3.94; N, 7.47%. **ZnTPP(NO<sub>2</sub>)(PE)<sub>2</sub>:** <sup>1</sup>H NMR in CDCl<sub>3</sub>:  $\delta$  (ppm) 9.14 (s, 1H,  $\beta$ -pyrrole-H), 8.88 (d, 1H,  $J$  = 5 Hz,  $\beta$ -pyrrole-H), 8.85 (d, 1H,  $J$  = 5 Hz,  $\beta$ -pyrrole-H), 8.74 (d, 1H,  $J$  = 4.5 Hz,  $\beta$ -pyrrole-H), 8.73 (d, 1H,  $J$  = 4.5 Hz,  $\beta$ -pyrrole-H), 8.21-8.13 (m, 8H, *meso-o*-phenyl-H), 7.82-7.64 (m, 12H, *meso-m* and *p*-phenyl-H), 7.40-7.34 (m, 4H,  $\beta$ -pyrrole-*o*-PE-H), 7.31-7.26 (m, 6H,  $\beta$ -pyrrole-*m* and *p*-PE-H). MALDI-TOF-MS (m/z): found 923.46 [M<sup>+</sup>], calcd. 923.36. Anal. Calcd for C<sub>60</sub>H<sub>35</sub>N<sub>5</sub>O<sub>2</sub>Zn·H<sub>2</sub>O: C, 76.55; H, 3.96; N, 7.44%. Found: C, 76.24; H, 3.79; N, 7.29%. **CuTPP(NO<sub>2</sub>)(PE)<sub>2</sub>:** MALDI-TOF-MS (m/z): found 921.98 [M<sup>+</sup>], calcd. 921.52. Anal. Calcd. for C<sub>60</sub>H<sub>35</sub>N<sub>5</sub>O<sub>2</sub>Cu: C, 78.42; H, 3.92; N, 7.51%. Found: C, 78.20; H, 3.83; N, 7.60%. **CoTPP(NO<sub>2</sub>)(PE)<sub>2</sub>:** ESI-MS (m/z): found 916.25 [M<sup>+</sup>], calcd., 916.90. Anal. Calcd. for C<sub>60</sub>H<sub>35</sub>N<sub>5</sub>O<sub>2</sub>Co·2H<sub>2</sub>O: C, 75.62; H, 4.13; N, 7.35%. Found: C, 75.45; H, 3.87; N, 7.31%.

#### (d) Synthesis of 2-nitro-12,13-dithienyl-*meso*-tetraphenylporphyrin and its metal complexes:

H<sub>2</sub>TPP(NO<sub>2</sub>)Br<sub>2</sub> (0.15 g, 0.183 mmol), thiophene-2-boronic acid (0.117 g, 0.914 mmol) and K<sub>2</sub>CO<sub>3</sub> (0.609 g, 4.40 mmol) were taken in a two-way stoppered RB flask. To this, 60 mL of distilled toluene was added and purged with Ar gas for 10 minutes. Then Pd(PPh<sub>3</sub>)<sub>4</sub> (0.042 g, 0.036 mmol) was added under Ar and heated to 90°C for 10 hrs. After completion of the reaction, the solvent was removed by rotary evaporation. The crude porphyrin was redissolved in CHCl<sub>3</sub> (50 mL) and washed with saturated NaHCO<sub>3</sub> (50 mL) followed by 30% NaCl solution (50 mL). Finally, the organic layer was dried over anhydrous Na<sub>2</sub>SO<sub>4</sub>. The crude product was purified on silica column using variant polarity from CHCl<sub>3</sub> to 2% EtOAc/CHCl<sub>3</sub> as eluent. The desired product was recrystallised from CHCl<sub>3</sub>/CH<sub>3</sub>OH mixture (1:3, v/v). The yield was found to be 0.085 g (56%).

**H<sub>2</sub>TPP(NO<sub>2</sub>)Th<sub>2</sub>:** <sup>1</sup>H NMR in CDCl<sub>3</sub>:  $\delta$  (ppm) 8.96 (s, 1H,  $\beta$ -pyrrole-H), 8.77 (t, 2H,  $J$  = 5.5 Hz,  $\beta$ -pyrrole-H), 8.68-8.59 (m, 2H,  $\beta$ -pyrrole-H), 8.30 (d, 2H,  $J$  = 6.5 Hz, *meso-o*-phenyl-H), 8.24 (d, 2H,  $J$  = 7 Hz, *meso-o*-phenyl-H), 7.99 (d, 2H,  $J$  = 7 Hz, *meso-o*-phenyl-H), 7.95 (d, 2H,  $J$  = 7 Hz, *meso-o*-phenyl-H), 7.84-7.70 (m, 6H, *meso-m* and *p*-phenyl-H), 7.46- 7.35 (m, 6H, *meso-m* and *p*-phenyl-H), 6.98 (s, 2H,  $\beta$ -pyrroleTh-H), 6.64-6.57 (m, 3H,  $\beta$ -pyrroleTh-H), 6.56 (s, 1H,  $\beta$ -pyrroleTh-H), -2.24 (s, 2H, imino-H). ESI-MS (m/z): found 824.23 [M<sup>+</sup>], calcd. 824.00. Anal.

Calcd for  $C_{52}H_{33}N_5O_2S_2 \cdot 2H_2O$ : C, 72.62; H, 4.34; N, 8.14; S, 7.46%. Found: C, 72.94; H, 4.22; N, 7.91; S, 7.16%.

The metal complexes were prepared with similar procedures of the corresponding metal complexes of  $MTPP(NO_2)Br_2$  and the yields were found to be almost quantitative. **NiTPP( $NO_2$ )Th<sub>2</sub>**:  $^1H$  NMR in  $CDCl_3$ :  $\delta$  (ppm) 8.90 (s, 1H,  $\beta$ -pyrrole-H), 8.53 (d, 1H,  $J = 5$  Hz,  $\beta$ -pyrrole-H), 8.43 (d, 1H,  $J = 5$  Hz,  $\beta$ -pyrrole-H), 8.36 (d, 1H,  $J = 5$  Hz,  $\beta$ -pyrrole-H), 8.29 (d, 1H,  $J = 5$  Hz,  $\beta$ -pyrrole-H), 8.02-7.96 (m, 4H, *meso-o*-phenyl-H), 7.74-7.55 (m, 10H, *meso-o*- and *m*-phenyl-H), 7.37-7.26 (m, 3H, *meso-m*- and *p*-phenyl-H), 7.24-7.21 (m, 3H, *meso-p*-phenyl-H), 7.06 (d, 1H,  $J = 4.5$  Hz,  $\beta$ -pyrroleTh-H), 7.02 (d, 1H,  $J = 5$  Hz,  $\beta$ -pyrroleTh-H), 6.60 (t, 1H,  $J = 4.5$  Hz,  $\beta$ -pyrroleTh-H), 6.53 (t, 1H,  $J = 4$  Hz,  $\beta$ -pyrroleTh-H), 6.47 (d, 1H,  $J = 2.5$  Hz,  $\beta$ -pyrroleTh-H), 6.36 (d, 1H,  $J = 2.5$  Hz,  $\beta$ -pyrroleTh-H). MALDI-TOF-MS ( $m/z$ ): found 880.94 [ $M^+$ ], calcd. 880.68. **ZnTPP( $NO_2$ )Th<sub>2</sub>**:  $^1H$  NMR in  $CDCl_3$ :  $\delta$  (ppm) 9.15 (s, 1H,  $\beta$ -pyrrole-H), 8.82 (d, 1H,  $J = 4.5$  Hz,  $\beta$ -pyrrole-H), 8.79 (d, 1H,  $J = 4.5$  Hz,  $\beta$ -pyrrole-H), 8.60 (t, 2H,  $J = 5$  Hz,  $\beta$ -pyrrole-H), 8.18 (t, 4H,  $J = 8.5$  Hz, *meso-o*-phenyl-H), 7.86 (t, 4H,  $J = 8$  Hz, *meso-o*-phenyl-H), 7.81-7.72 (m, 4H, *meso-m*-phenyl-H), 7.68 (t, 2H,  $J = 7.5$  Hz, *meso-m*-phenyl-H), 7.42-7.35 (m, 2H, *meso-m*-phenyl-H), 7.33-7.28 (m, 4H, *meso-p*-phenyl-H), 7.04 (d, 2H,  $J = 5$  Hz,  $\beta$ -pyrroleTh-H), 6.66-6.56 (m, 4H,  $\beta$ -pyrroleTh-H). MALDI-TOF-MS ( $m/z$ ): found 887.59 [ $M^+$ ], calcd. 887.37. **CuTPP( $NO_2$ )Th<sub>2</sub>**: MALDI-TOF-MS ( $m/z$ ): found 885.89 [ $M^+$ ], calcd. 885.53. Anal. Calcd for  $C_{52}H_{31}N_5O_2S_2Cu$ : C, 70.53; H, 3.53; N, 7.91; S, 7.24%. Found: C, 70.64; H, 3.56; N, 7.97; S, 7.51%. **CoTPP( $NO_2$ )Th<sub>2</sub>**: ESI-MS ( $m/z$ ): found 880.16 [ $M^+$ ], calcd. 880.13. Anal. Calcd for  $C_{52}H_{31}N_5O_2S_2Co \cdot 0.5CHCl_3$ : C, 67.34; H, 3.38; N, 7.45; S, 6.82%. Found: C, 67.46; H, 3.42; N, 7.41; S, 6.55%.

#### (e) Synthesis of 2-nitro-12,13-dicyano-*meso*-tetraphenylporphyrinato Nickel(II)

NiTPP( $NO_2$ )Br<sub>2</sub> (0.15 g, 0.172 mmol) and copper(I)cyanide (0.307 g, 3.43 mmol) was taken in 100 mL two neck RB and to it was added 10 mL of quinoline. The reaction mixture was refluxed at 200°C for 2 hours. At the end of this period the reaction mixture was cooled and filtered through G-4 crucible to remove excess copper cyanide. 30 mL of  $CHCl_3$  was added and organic phase was washed with 10% HCl (3  $\times$  50 mL), water (2 times), dried over  $Na_2SO_4$  and then evaporated to dryness. The crude product was loaded on silica column and purified using  $CHCl_3$  as eluent. NiTPP( $NO_2$ )CN was obtained as first fraction in 24% yield followed by NiTPP( $NO_2$ )(CN)<sub>2</sub> in 61% yield.

**NiTPP( $NO_2$ )(CN)<sub>2</sub>**:  $^1H$  NMR in  $CDCl_3$ :  $\delta$  (ppm) 9.22 (s, 1H,  $\beta$ -pyrrole-H), 8.84-8.69 (m, 3H,  $\beta$ -pyrrole-H), 8.62 (d, 1H,  $J = 5$  Hz,  $\beta$ -pyrrole-H), 7.92-7.81 (m, 11H, *meso-o*- and *m*-phenyl-H), 7.76-7.67 (m, 9H, *meso-m*- and *p*-phenyl-H). MALDI-TOF-MS ( $m/z$ ): found 766.82 [ $M^+$ ], calcd. 766.44.

#### (f) Synthesis of 2-nitro-12,13-dicyano-*meso*-tetraphenylporphyrin and its metal complexes

NiTPP( $NO_2$ )(CN)<sub>2</sub> (0.07 g, 0.091 mmol) was taken in 20 mL of  $CHCl_3$  and to it was added 0.1 mL of conc.  $H_2SO_4$  dropwise, stirred vigorously at 0°C for 2 hours. At the end of this period, distilled water (40 mL) was added dropwise to the reaction mixture with constant stirring. The organic layer was separated and washed with water (2  $\times$  30 mL) followed by neutralization using 25% aqueous ammonia solution (20 mL). The organic layer was dried over anhydrous  $Na_2SO_4$ .



and concentrated to small volume. This was purified by silica gel chromatography using  $\text{CHCl}_3$  as eluent and the yield of the product was found to be 0.05 g (77%).

**$\text{H}_2\text{TPP}(\text{NO}_2)(\text{CN})_2$** :  $^1\text{H}$  NMR in  $\text{CDCl}_3$ :  $\delta$  (ppm) 9.33 (s, 1H,  $\beta$ -pyrrole-H), 9.02-8.94 (m, 3H,  $\beta$ -pyrrole-H), 8.91 (d, 1H,  $J = 5$  Hz,  $\beta$ -pyrrole-H), 8.20-8.10 (m, 8H, *meso-o*-phenyl-H), 7.99-7.91 (m, 3H, *meso-m-* and *p*-phenyl-H), 7.88-7.77 (m, 9H, *meso-m-* and *p*-phenyl-H), -2.52 (s, 2H, imino-H). ESI-MS ( $m/z$ ): found 711.00  $[\text{M}+\text{H}]^+$ , calcd. 710.77. Anal. Calcd for  $\text{C}_{46}\text{H}_{27}\text{N}_7\text{O}_2$ : C, 77.84; H, 3.83; N, 13.81%. Found: C, 77.66; H, 4.13; N, 13.52%.

$\text{MTPP}(\text{NO}_2)(\text{CN})_2$  (M = Co(II), Cu(II) and Zn(II)) were prepared with similar procedures of the corresponding metal complexes of  $\text{MTPP}(\text{NO}_2)\text{Br}_2$  and the yields were found to be 80 - 90%.

**$\text{ZnTPP}(\text{NO}_2)(\text{CN})_2$** :  $^1\text{H}$  NMR in  $\text{CDCl}_3$ :  $\delta$  (ppm) 9.35 (s, 1H,  $\beta$ -pyrrole-H), 8.89-8.79 (m, 3H,  $\beta$ -pyrrole-H), 8.77 (br s, 1H,  $\beta$ -pyrrole-H), 8.15-7.98 (m, 8H *meso-o*-phenyl-H), 7.92-7.69 (m, 12H, *meso-m-* and *p*-phenyl-H). MALDI-TOF-MS ( $m/z$ ): found 773.36  $[\text{M}^+]$ , calcd., 773.14.

**$\text{CuTPP}(\text{NO}_2)(\text{CN})_2$** : MALDI-TOF-MS ( $m/z$ ): 710.02 (calcd., 771.30).  $\text{C}_{46}\text{H}_{25}\text{N}_7\text{O}_2\text{Cu}\cdot 0.5\text{H}_2\text{O}$ : C, 70.81; H, 3.36; N, 12.57%. Found: C, 70.92; H, 3.50; N, 12.69%.  **$\text{CoTPP}(\text{NO}_2)(\text{CN})_2$** : MALDI-TOF-MS ( $m/z$ ): found 766.19  $[\text{M}^+]$ , calcd. 766.14. Anal. Calcd for  $\text{C}_{46}\text{H}_{25}\text{N}_7\text{O}_2\text{Co}\cdot\text{H}_2\text{O}$ : C, 70.41; H, 3.47; N, 12.50%. Found: C, 70.64; H, 3.25; N, 12.32%.

## II. Synthesis of $\text{MTPP}(\text{NO}_2)\text{X}_6$ (X = Br, Ph, Th and PE) derivatives:

(a) Synthesis of 2-nitro-7,8,12,13,17,18-hexabromo-*meso*-tetraphenylporphyrinato Copper(II):<sup>21c</sup>  $\text{CuTPP}(\text{NO}_2)$  (0.3 g, 0.416 mmol) was taken in 40 mL of distilled 1,2-dichloroethane in a 100 mL RB. To this, recrystallized NBS (0.74 g, 4.16 mmol) was added and refluxed for 16 hrs at 80°C. At the end of the reaction, the solvent was removed by rotary evaporation and redissolved in  $\text{CHCl}_3$  (25 mL). The crude product was purified on silica column using  $\text{CHCl}_3$  as eluent and recrystallised from  $\text{CHCl}_3/\text{CH}_3\text{OH}$  mixture (1:3, v/v). The yield was found to be 0.28 g (81%).

MALDI-TOF-MS ( $m/z$ ): found 1195.84  $[\text{M}+\text{H}]^+$ , calcd. 1194.65. Anal. Calcd for  $\text{C}_{44}\text{H}_{21}\text{N}_5\text{Br}_6\text{O}_2\text{Cu}\cdot 0.5\text{H}_2\text{O}$ : C, 43.91; H, 1.84; N, 5.82%. Found: C, 43.76; H, 2.20; N, 5.28%.

### (b) Synthesis of 2-nitro-7,8,12,13,17,18-hexabromo-*meso*-tetraphenylporphyrin and its metal complexes

$\text{CuTPP}(\text{NO}_2)\text{Br}_6$  (0.25 g, 0.209 mmol) was dissolved in 40 mL of  $\text{CHCl}_3$ . To this, 1.5 mL of conc.  $\text{H}_2\text{SO}_4$  was added dropwise and stirred vigorously at 0°C for 1 hour. At the end of this period, distilled water (80 mL) was added dropwise to the reaction mixture with stirring. The organic layer was separated and washed with water ( $2 \times 50$  mL) followed by neutralization using aqueous ammonia (25%) solution (20 mL). The organic layer was dried over anhydrous  $\text{Na}_2\text{SO}_4$  and concentrated to small volume. This was purified by silica gel chromatography using  $\text{CHCl}_3$  as eluent, and the yield of the product was found to be 92%.

**$\text{H}_2\text{TPP}(\text{NO}_2)\text{Br}_6$** :  $^1\text{H}$  NMR in  $\text{CDCl}_3$ :  $\delta$  (ppm) 8.59 (s, 1H,  $\beta$ -pyrrole-H), 8.24 (d, 4H,  $J = 7$  Hz, *meso-o*-phenyl-H), 8.20 (ad, 4H,  $J = 7$  Hz, *meso-o*-phenyl-H), 7.87-7.76 (m, 10H,  $J = 8.5$  Hz, *meso-m-* and *p*-phenyl-H), 7.74 (t, 2H,  $J = 7.5$  Hz, *meso-p*-phenyl-H). MALDI-TOF-MS ( $m/z$ ): found 1133.51  $[\text{M}^+]$ , calcd. 1133.12.

The metal complexes were prepared with similar procedures of the corresponding metal complexes of MTPP(NO<sub>2</sub>)Br<sub>2</sub> and the yields were found to 84 - 90%. **NiTPP(NO<sub>2</sub>)Br<sub>6</sub>**: <sup>1</sup>H NMR in CDCl<sub>3</sub>:  $\delta$  (ppm) 8.50 (s, 1H,  $\beta$ -pyrrole-H), 7.97 (d, 2H,  $J$  = 7 Hz, *meso-o*-phenyl-H), 7.96-7.89 (m, 6H, *meso-o*-phenyl-H), 7.79-7.62 (m, 12H, *meso-m*- and *p*-phenyl-H). MALDI-TOF-MS (m/z): found 1190.12 [M<sup>+</sup>], calcd. 1189.80. Anal. Calcd for C<sub>44</sub>H<sub>21</sub>Br<sub>6</sub>N<sub>5</sub>O<sub>2</sub>Ni: C, 44.42; H, 1.78; N, 5.89%. Found: C, 44.12; H, 1.92; N, 5.66%. **ZnTPP(NO<sub>2</sub>)Br<sub>6</sub>**: <sup>1</sup>H NMR in CDCl<sub>3</sub>:  $\delta$  (ppm) 8.74 (s, 1H,  $\beta$ -pyrrole-H), 8.17 (t, 4H,  $J$  = 8 Hz, *meso-o*-phenyl-H), 8.11 (t, 4H,  $J$  = 8.5 Hz, *meso-o*-phenyl-H), 7.86-7.72 (m, 10H, *meso-m*- and *p*-phenyl-H), 7.69 (t, 2H,  $J$  = 7.5 Hz, *meso-p*-phenyl-H). MALDI-TOF-MS (m/z): found 1196.67 [M<sup>+</sup>], calcd. 1196.50. **CoTPP(NO<sub>2</sub>)Br<sub>6</sub>**: MALDI-TOF-MS (m/z): found 1190.57 [M<sup>+</sup>], calcd. 1190.04.

**(b) Synthesis of 2-nitro-7,8,12,13,17,18-hexaphenyl-meso-tetraphenylporphyrin and its metal complexes:**

H<sub>2</sub>TPP(NO<sub>2</sub>)Br<sub>6</sub> (0.3 g, 0.264 mmol), phenylboronic acid (0.774 g, 6.33 mmol) and K<sub>2</sub>CO<sub>3</sub> (1.76 g, 12.67 mmol) were taken in a two-neck RB flask. To this, 120 mL of distilled toluene was added and purged with Ar gas for 15 minutes. Then Pd(PPh<sub>3</sub>)<sub>4</sub> (0.061 g, 0.05 mmol) was added under Ar and heated to 100 °C for 15 hrs. After completion of the reaction, the solvent was removed by rotary evaporation. The crude porphyrin was redissolved in CHCl<sub>3</sub> (80 mL) and washed with saturated NaHCO<sub>3</sub> (70 mL) followed by 30% NaCl solution (50 mL). Finally, the organic layer was dried over anhydrous Na<sub>2</sub>SO<sub>4</sub>. The crude product was purified on silica column using variant polarity from CHCl<sub>3</sub> to 5 - 8% EtOAc in CHCl<sub>3</sub> as eluent. The desired product was recrystallised from CHCl<sub>3</sub>/CH<sub>3</sub>OH mixture (1:3, v/v). The yield was found to be 0.23 g (78%).

**H<sub>2</sub>TPP(NO<sub>2</sub>)Ph<sub>6</sub>**: <sup>1</sup>H NMR in CDCl<sub>3</sub>:  $\delta$  (ppm) 8.31 (s, 1H,  $\beta$ -pyrrole-H), 8.03 (d, 2H,  $J$  = 7 Hz, *meso-o*-phenyl-H), 7.85 (d, 2H,  $J$  = 7 Hz, *meso-o*-phenyl-H), 7.58 (d, 2H,  $J$  = 7.5 Hz, *meso-o*-phenyl-H), 7.56 (d, 2H,  $J$  = 8 Hz, *meso-o*-phenyl-H), 7.39-7.18 (m, 5H, *meso-m*-phenyl-H), 6.96-6.58 (m, 33H,  $\beta$ -pyrrolePh-H, *meso-m*- and *p*-phenyl-H), 6.5 (d, 4H,  $J$  = 7 Hz,  $\beta$ -pyrrole Ph-H). ESI-MS (m/z): found 1176.38 [M•Na•K-H]<sup>+</sup>, calcd. 1177.37. Anal. Calcd for C<sub>80</sub>H<sub>53</sub>N<sub>5</sub>O<sub>2</sub>: C, 86.07; H, 4.79; N, 6.27%. Found: C, 86.01; H, 4.93; N, 6.15%.

The metal complexes were prepared with similar procedures of the corresponding metal complexes of MTPP(NO<sub>2</sub>)Br<sub>2</sub> and crude products were purified by silica gel (for Co (II), Ni(II) and Cu(II)) or alumina for ZnTPP(NO<sub>2</sub>)Ph<sub>6</sub> column chromatography using CHCl<sub>3</sub>/5 - 6% EtOAc in CHCl<sub>3</sub> as eluent. The desired product was recrystallised from CHCl<sub>3</sub>/CH<sub>3</sub>OH mixture (1:3, v/v) containing a drop of Et<sub>3</sub>N. The yield was found to be 80-86%.

**NiTPP(NO<sub>2</sub>)Ph<sub>6</sub>**: <sup>1</sup>H NMR in CDCl<sub>3</sub>:  $\delta$  (ppm) 8.37 (s, 1H,  $\beta$ -pyrrole-H), 7.60 (dd, 2H,  $J$  = 7 Hz,  $J$  = 1 Hz, *meso-o*-phenyl-H), 7.57 (dd, 2H,  $J$  = 7 Hz,  $J$  = 1 Hz, *meso-o*-phenyl-H), 7.25-7.12 (m, 4H, *meso-o*-phenyl-H), 7.06 (t, 2H,  $J$  = 7.5 Hz, *meso-m*-phenyl-H), 7.03 (t, 4H,  $J$  = 7.0 Hz, *meso-m*-phenyl-H), 6.88-6.50 (m, 36H,  $\beta$ -pyrrolePh-H, *meso-m*- and *p*-phenyl-H). MALDI-TOF-MS (m/z): found 1173.12 [M<sup>+</sup>], calcd. 1173.01. **ZnTPP(NO<sub>2</sub>)Ph<sub>6</sub>**: <sup>1</sup>H NMR in CDCl<sub>3</sub>:  $\delta$  (ppm) 8.57 (s, 1H,  $\beta$ -pyrrole-H), 7.93 (d, 2H,  $J$  = 7 Hz, *meso-o*-phenyl-H), 7.78 (d, 2H,  $J$  = 7 Hz, *meso-o*-phenyl-H), 7.44 (d, 2H,  $J$  = 7 Hz, *meso-o*-phenyl-H), 7.42 (d, 2H,  $J$  = 7 Hz, *meso-o*-phenyl-H), 7.32-7.20 (m, 4H,  $J$  = 7.5 Hz, *meso-m*-phenyl-H), 7.16 (t, 2H,  $J$  = 8.0 Hz, *meso-m*-phenyl-H), 6.89-6.57 (m, 36H,  $\beta$ -pyrrolePh-H and *meso-m*- and *p*-phenyl-H). MALDI-TOF-MS (m/z): found 1179.62 [M<sup>+</sup>], calcd. 1179.71. **CuTPP(NO<sub>2</sub>)Ph<sub>6</sub>**: MALDI-TOF-MS (m/z): found 1178.18

[M<sup>+</sup>], calcd. 1177.86. Anal. Calcd for C<sub>80</sub>H<sub>51</sub>N<sub>5</sub>O<sub>2</sub>Cu: C, 78.13; H, 4.19; N, 5.66%. Found: C, 78.38; H, 4.30; N, 5.47%. **CoTPP(NO<sub>2</sub>)Ph<sub>6</sub>**: ESI-MS (m/z): found 1173.38 [M<sup>+</sup>], calcd. 1173.25. Anal. Calcd for C<sub>80</sub>H<sub>51</sub>N<sub>5</sub>O<sub>2</sub>Co: C, 81.90; H, 4.38; N, 5.97%. Found: C, 81.98; H, 4.24; N, 5.74%.

### (c) Synthesis of 2-nitro-7,8,12,13,17,18-hexaphenylethynyl-*meso*-tetraphenylporphyrin and its metal complexes

H<sub>2</sub>TPP(NO<sub>2</sub>)Br<sub>6</sub> (0.2 g, 0.176 mmol) and Pd(PPh<sub>3</sub>)<sub>4</sub> (0.04 g, 0.035 mmol) were dissolved in distilled 1,4-dioxane and purged with Ar gas for 15 minutes. To this, tributyl(phenylethynyl)stannane (0.618 mL, 1.76 mmol) in 100 mL of degassed dioxane was added and heated to 80 °C for 40 minutes under Ar atmosphere. After completion of the reaction, the solvent was removed by vacuum distillation. The crude porphyrin was redissolved in CHCl<sub>3</sub> (20 mL) and purified on silica column using CHCl<sub>3</sub>/hexane mixture (7:3, v/v) to 100% CHCl<sub>3</sub> as eluent. The desired product was recrystallised from CHCl<sub>3</sub>/CH<sub>3</sub>OH mixture (1:3, v/v) containing one drop of Et<sub>3</sub>N. The yield was found to be 0.12 g (54%).

**H<sub>2</sub>TPP(NO<sub>2</sub>)(PE)<sub>6</sub>**: <sup>1</sup>H NMR in CDCl<sub>3</sub>: δ (ppm) 8.60 (bs, 1H, β-pyrrole-H), 8.44 (d, 2H, *J* = 6.5 Hz, *meso*-*o*-phenyl-H), 8.40 (d, 2H, *J* = 7.5 Hz, *meso*-*o*-phenyl-H), 8.28 (d, 2H, *J* = 7 Hz, *meso*-*o*-phenyl-H), 7.83-7.70 (m, 8H, *meso*-*m*-phenyl-H), 7.70-7.64 (m, 4H, *meso*-*p*-phenyl-H), 7.37-7.18 (m, 30H, β-pyrrole PE-H), -1.43 (bs, 2H, NH). ESI-MS (m/z): found 1261.47 [M+H]<sup>+</sup>, calcd. 1261.47. Anal. Calcd for C<sub>92</sub>H<sub>53</sub>N<sub>5</sub>O<sub>2</sub>•1.5 H<sub>2</sub>O: C, 85.83; H, 4.38; N, 5.44%. Found: C, 85.98; H, 4.33; N, 5.34%.

The metal complexes were prepared with similar procedures of the corresponding metal complexes of MTPP(NO<sub>2</sub>)Br<sub>2</sub> and the yields were found to be 80 - 90%. **NiTPP(NO<sub>2</sub>)(PE)<sub>6</sub>**: <sup>1</sup>H NMR in CDCl<sub>3</sub>: δ (ppm) 8.57 (s, 1H, β-pyrrole-H), 8.20 (d, 2H, *J* = 7 Hz, *meso*-*o*-phenyl-H), 8.17 (d, 2H, *J* = 7 Hz, *meso*-*o*-phenyl-H), 8.15-8.12 (m, 2H, *meso*-*o*-phenyl-H), 8.08 (d, 2H, *J* = 7 Hz, *meso*-*o*-phenyl-H), 7.75-7.64 (m, 10H, *meso*-*m*- and *p*-phenyl-H), 7.62-7.54 (m, 2H, *meso*-*p*-phenyl-H), 7.32-7.16 (m, 30H, β-pyrrole PE-H). MALDI-TOF-MS (m/z): found 1317.63 [M<sup>+</sup>], calcd. 1317.14. Anal. Calcd for C<sub>92</sub>H<sub>51</sub>N<sub>5</sub>O<sub>2</sub>Ni: C, 83.89; H, 3.90; N, 5.32%. Found: C, 83.53; H, 4.04; N, 5.19%. **ZnTPP(NO<sub>2</sub>)(PE)<sub>6</sub>**: <sup>1</sup>H NMR in CDCl<sub>3</sub>: δ (ppm) 8.81 (s, 1H, β-pyrrole-H), 8.34 (d, 2H, *J* = 7.5 Hz, *meso*-*o*-phenyl-H), 8.32-8.29 (m, 4H, *meso*-*o*-phenyl-H), 8.22 (d, 2H, *J* = 8.5 Hz, *meso*-*o*-phenyl-H), 7.78-7.66 (m, 10H, *meso*-*m*- and *p*-phenyl-H), 7.62 (dt, 2H, *J* = 5 Hz, *J* = 2 Hz, *meso*-*p*-phenyl-H), 7.40-7.18 (m, 30H, β-pyrrole PE-H). MALDI-TOF-MS (m/z): found 1324.17 [M<sup>+</sup>], calcd. 1323.84. **CuTPP(NO<sub>2</sub>)(PE)<sub>6</sub>**: MALDI-TOF-MS (m/z): found 1322.38 [M<sup>+</sup>], calcd. 1322.00. Anal. Calcd for C<sub>92</sub>H<sub>51</sub>N<sub>5</sub>O<sub>2</sub>Cu•1.5H<sub>2</sub>O: C, 81.97; H, 4.19; N, 5.11%. Found: C, 81.79; H, 3.96; N, 5.12%. **CoTPP(NO<sub>2</sub>)(PE)<sub>6</sub>**: ESI-MS (m/z): found 1317.41 [M<sup>+</sup>], calcd. 1317.38. Anal. Calcd for C<sub>92</sub>H<sub>51</sub>N<sub>5</sub>O<sub>2</sub>Co: C, 83.88; H, 3.90; N, 5.31%. Found: C, 83.74; H, 3.73; N, 5.44%.

### (d) Synthesis of 2-nitro-7,8,12,13,17,18-hexa(2-thienyl)-*meso*-tetraphenylporphyrin

H<sub>2</sub>TPP(NO<sub>2</sub>)Br<sub>6</sub> (0.070 g, 0.0617 mmol), thiophene-2-boronic acid (0.189 g, 1.477 mmol) and K<sub>2</sub>CO<sub>3</sub> (0.252 g, 1.823 mmol) were taken in two-neck RB flask. To this, 35 mL of distilled toluene was added and purged with Ar gas for 15 minutes. Then Pd(PPh<sub>3</sub>)<sub>4</sub> (0.014 g, 0.012 mmol) was added under Ar and heated to 90 °C for 15 hrs. After completion of the reaction, the solvent

was removed by rotary evaporation. The crude porphyrin was redissolved in CHCl<sub>3</sub> (30 mL) and washed with saturated NaHCO<sub>3</sub> (25 mL) followed by 30% NaCl solution (25 mL). Finally, the organic layer was dried over anhydrous Na<sub>2</sub>SO<sub>4</sub>. The crude product was purified on silica column using variant polarity from CHCl<sub>3</sub> to 5-8% EtOAc in CHCl<sub>3</sub> as eluent. The desired product was recrystallised from CHCl<sub>3</sub>/CH<sub>3</sub>OH mixture (1:3, v/v). The yield was found to be 0.036 g (51%).

**H<sub>2</sub>TPP(NO<sub>2</sub>)Th<sub>6</sub>:** <sup>1</sup>H NMR in CDCl<sub>3</sub>:  $\delta$  (ppm) 8.28 (s, 1H,  $\beta$ -pyrrole-H), 7.82 (d, 1H,  $J$  = 6.5 Hz, *meso-o*-phenyl-H), 7.98 (d, 1H,  $J$  = 6.5 Hz, *meso-o*-phenyl-H), 7.94 - 7.78 (m, 3H, *meso-o*-phenyl-H), 7.74 (s, 1H, *meso-o*-phenyl-H), 7.73 (s, 1H, *meso-o*-phenyl-H), 7.66 - 7.55 (m, 4H, *meso-o*-phenyl and *meso-m*-phenyl), 7.52 - 7.37 (m, 9H, *meso-m*- and *p*-phenyl), 7.37-7.27 (m, 2H,  $\beta$ -pyrroleTh-H), 7.15-6.96 (m, 6H,  $\beta$ -pyrroleTh-H), 6.95 - 6.84 (m, 2H,  $\beta$ -pyrroleTh-H), 6.80 - 6.25 (m, 8H,  $\beta$ -pyrroleTh-H). MALDI-TOF-MS ( $m/z$ ): found 1152.21 [ $M^+$ ], calcd. 1152.50. Anal. Calcd for C<sub>68</sub>H<sub>41</sub>N<sub>5</sub>O<sub>2</sub>S<sub>6</sub>•0.5H<sub>2</sub>O: C, 70.32; H, 3.64; N, 6.03; S, 16.56%. Found: C, 70.39; H, 3.80; N, 5.90; S, 16.55%.

The metal complexes were prepared with similar procedures of the corresponding metal complexes of MTPP(NO<sub>2</sub>)Br<sub>2</sub> and the yields were found to be 80 - 90%. **NiTPP(NO<sub>2</sub>)Th<sub>6</sub>:** <sup>1</sup>H NMR in CDCl<sub>3</sub>:  $\delta$  (ppm) 8.39 (s, 1H,  $\beta$ -pyrrole-H), 7.82-7.63 (m, 6H, *meso-o*-phenyl-H), 7.41-7.28 (m, 8H, *meso-o*- and *m*-phenyl-H), 7.25-7.18 (m, 2H, *meso-m*-phenyl-H), 7.01-6.80 (m, 11H, *meso-p*-phenyl and  $\beta$ -pyrroleTh-H), 6.55- 6.17 (m, 11H,  $\beta$ -pyrroleTh-H). MALDI-TOF-MS ( $m/z$ ): found 1209.50 [ $M^+$ ], calcd. 1209.18. Anal. Calcd for C<sub>68</sub>H<sub>39</sub>N<sub>5</sub>O<sub>2</sub>S<sub>6</sub>Ni•0.5H<sub>2</sub>O: C, 64.84; H, 3.14; N, 5.52; S, 15.16%. Found: C, 64.69; H, 3.50; N, 5.20; S, 15.35%. **ZnTPP(NO<sub>2</sub>)Th<sub>6</sub>:** <sup>1</sup>H NMR in CDCl<sub>3</sub>:  $\delta$  (ppm) 8.50 (s, 1H,  $\beta$ -pyrrole-H), 8.09 (d, 2H,  $J$  = 7 Hz, *meso-o*-phenyl-H), 7.97 (d, 2H,  $J$  = 6.5 Hz, *meso-m*-phenyl-H), 7.84 - 7.73 (m, 4H, *meso-o*-phenyl-H), 7.44 - 7.28 (m, 6H, *meso-m*-phenyl), 7.08 - 6.89 (m, 8H, *meso-m*- and *p*-phenyl,  $\beta$ -pyrroleTh-H), 6.88 - 6.75 (m, 4H,  $\beta$ -pyrroleTh-H), 6.65 - 6.29 (m, 12H,  $\beta$ -pyrroleTh-H). MALDI-TOF-MS ( $m/z$ ): found 1216.36 [ $M^+$ ], calcd. 1215.88. **CuTPP(NO<sub>2</sub>)Th<sub>6</sub>:** MALDI-TOF-MS ( $m/z$ ): found 1214.49 [ $M^+$ ], calcd. 1214.03. Anal. Calcd for C<sub>68</sub>H<sub>39</sub>N<sub>5</sub>O<sub>2</sub>S<sub>6</sub>Cu: C, 64.84; H, 3.24; N, 5.77; S, 15.85%. Found: C, 64.65; H, 3.50; N, 5.89; S, 15.67%. **CoTPP(NO<sub>2</sub>)Th<sub>6</sub>:** ESI-MS ( $m/z$ ): found 1208.11 [ $M^+$ ], calcd. 1208.08. Anal. Calcd for C<sub>68</sub>H<sub>39</sub>N<sub>5</sub>O<sub>2</sub>S<sub>6</sub>Co: C, 67.53; H, 3.25; N, 5.79; S, 15.91%. Found: C, 67.74; H, 3.42; N, 5.81; S, 15.45%.



**Table S1.** Crystal structure data of NiTPP(NO<sub>2</sub>)(Ph)<sub>2</sub>(Pyridine) (**1**), ZnTPP(NO<sub>2</sub>)(PE)<sub>2</sub>(CH<sub>3</sub>OH) (**2**), ZnTPP(NO<sub>2</sub>)Br<sub>2</sub>(CH<sub>3</sub>OH) (**3**), NiTPP(NO<sub>2</sub>)Br<sub>6</sub> (**4**), and H<sub>2</sub>TPP(NO<sub>2</sub>)(Th)<sub>2</sub> (**5**).

|                                               | <b>1</b>                                                         | <b>2</b>                                                         | <b>3</b>                                                                         | <b>4</b>                                                                                        | <b>5</b>                                                                                     |
|-----------------------------------------------|------------------------------------------------------------------|------------------------------------------------------------------|----------------------------------------------------------------------------------|-------------------------------------------------------------------------------------------------|----------------------------------------------------------------------------------------------|
| Empirical formula                             | C <sub>61</sub> H <sub>40</sub> N <sub>6</sub> O <sub>2</sub> Ni | C <sub>61</sub> H <sub>43</sub> N <sub>5</sub> O <sub>4</sub> Zn | C <sub>45</sub> H <sub>29</sub> N <sub>5</sub> O <sub>5</sub> Br <sub>2</sub> Zn | C <sub>88</sub> H <sub>42</sub> N <sub>10</sub> O <sub>4</sub> Br <sub>12</sub> Ni <sub>2</sub> | C <sub>53</sub> H <sub>39</sub> C <sub>10</sub> N <sub>5</sub> O <sub>4</sub> S <sub>2</sub> |
| Formula wt.                                   | 947.70                                                           | 975.37                                                           | 944.90                                                                           | 2379.66                                                                                         | 874.01                                                                                       |
| Crystal system                                | Triclinic                                                        | Triclinic                                                        | Triclinic                                                                        | Triclinic                                                                                       | Triclinic                                                                                    |
| Space group                                   | P-1                                                              | P-1                                                              | P-1                                                                              | P-1                                                                                             | P-1                                                                                          |
| <i>a</i> (Å)                                  | 11.938(5)                                                        | 12.7702(6)                                                       | 12.490(1)                                                                        | 14.211(5)                                                                                       | 13.948(5)                                                                                    |
| <i>b</i> (Å)                                  | 12.248(5)                                                        | 13.5976(6)                                                       | 13.544(2)                                                                        | 14.367(5)                                                                                       | 14.270(5)                                                                                    |
| <i>c</i> (Å)                                  | 17.642(5)                                                        | 16.1781(7)                                                       | 14.381(2)                                                                        | 19.651(5)                                                                                       | 14.559(5)                                                                                    |
| <i>α</i> (°)                                  | 109.644(5)                                                       | 66.257(2)                                                        | 107.593(7)                                                                       | 89.091(5)                                                                                       | 118.629(5)                                                                                   |
| <i>β</i> (°)                                  | 99.080(5)                                                        | 79.410(2)                                                        | 108.531(7)                                                                       | 89.869(5)                                                                                       | 94.368(5)                                                                                    |
| <i>γ</i> (°)                                  | 94.664(5)                                                        | 75.696(2)                                                        | 103.813(8)                                                                       | 89.984(5)                                                                                       | 112.334(5)                                                                                   |
| Volume (Å <sup>3</sup> )                      | 2373.8(15)                                                       | 2480.46(19)                                                      | 2042.3(5)                                                                        | 4012(2)                                                                                         | 2230.5(14)                                                                                   |
| <i>Z</i>                                      | 2                                                                | 2                                                                | 2                                                                                | 2                                                                                               | 2                                                                                            |
| <i>D</i> <sub>calc</sub> (mg/m <sup>3</sup> ) | 1.326                                                            | 1.306                                                            | 1.537                                                                            | 1.970                                                                                           | 1.301                                                                                        |
| Wavelength (Å)                                | 0.71073                                                          | 0.71073                                                          | 0.71073                                                                          | 0.71073                                                                                         | 0.71073                                                                                      |
| <i>T</i> (°C)                                 | 293 K                                                            | 293 K                                                            | 293 K                                                                            | 293 K                                                                                           | 293 K                                                                                        |
| No. of total reflns.                          | 11581                                                            | 12091                                                            | 30281                                                                            | 16103                                                                                           | 11007                                                                                        |
| No. of indepnt. reflns.                       | 6207                                                             | 8376                                                             | 9620                                                                             | 9459                                                                                            | 4083                                                                                         |
| <i>R</i> <sup>a</sup>                         | 0.0615                                                           | 0.0625                                                           | 0.1061                                                                           | 0.0585                                                                                          | 0.1083                                                                                       |
| <i>R</i> <sub>w</sub> <sup>b</sup>            | 0.1337                                                           | 0.1886                                                           | 0.2598                                                                           | 0.1562                                                                                          | 0.2415                                                                                       |
| CCDC                                          | 1018319                                                          | 1018393                                                          | 1019075                                                                          | 1019824                                                                                         | 1018509                                                                                      |

**Table S2.** Selected bond lengths and bond angles of NiTPP(NO<sub>2</sub>)Ph<sub>2</sub>(Py) (**1**), ZnTPP(NO<sub>2</sub>)(PE)<sub>2</sub> (MeOH) (**2**), ZnTPP(NO<sub>2</sub>)Br<sub>2</sub>(MeOH) (**3**), NiTPP(NO<sub>2</sub>)Br<sub>6</sub> (**4**) and H<sub>2</sub>TPP(NO<sub>2</sub>)(Th)<sub>2</sub> (**5**).

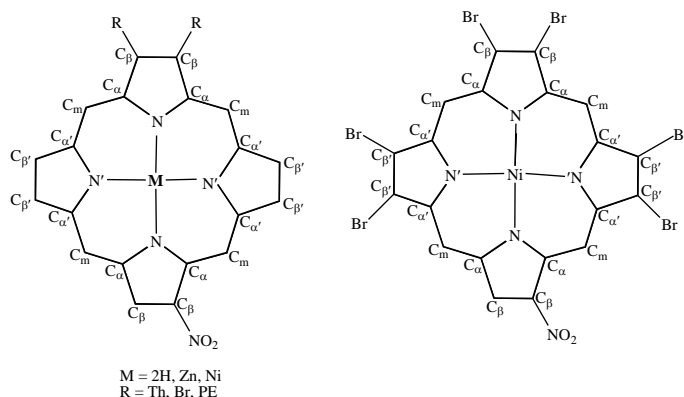

|                                                   | <b>1</b>        | <b>2</b>        | <b>3</b>         | <b>4</b>         | <b>5</b>        |
|---------------------------------------------------|-----------------|-----------------|------------------|------------------|-----------------|
| Bond Length (Å)                                   |                 |                 |                  |                  |                 |
| <b>M-N</b>                                        | <b>2.112(3)</b> | <b>2.088(2)</b> | <b>2.087(9)</b>  | <b>1.920(6)</b>  | -               |
| M-N'                                              | 2.048(3)        | 2.042(3)        | 2.042(9)         | 1.927(6)         | -               |
| M-O/M-N                                           | 2.156(3)        | 2.173(3)        | 2.154(12)        | -                | -               |
| N-C <sub>α</sub>                                  | 1.377(4)        | 1.372(4)        | 1.370(13)        | 1.384(10)        | 1.368(7)        |
| N'-C <sub>α</sub>                                 | 1.376(4)        | 1.372(4)        | 1.349(13)        | 1.375(10)        | 1.376(6)        |
| C <sub>α</sub> -C <sub>β</sub>                    | 1.450(5)        | 1.448(4)        | 1.453(15)        | 1.447(10)        | 1.460(7)        |
| C <sub>α'</sub> -C <sub>β'</sub>                  | 1.439(5)        | 1.445(5)        | 1.468(15)        | 1.443(10)        | 1.422(9)        |
| <b>C<sub>β</sub>-C<sub>β</sub></b>                | <b>1.349(5)</b> | <b>1.370(5)</b> | <b>1.334(15)</b> | <b>1.336(10)</b> | <b>1.340(9)</b> |
| C <sub>β'</sub> -C <sub>β'</sub>                  | 1.344(5)        | 1.339(5)        | 1.298(15)        | <b>1.349(10)</b> | 1.358(6)        |
| C <sub>α</sub> -C <sub>m</sub>                    | 1.394(4)        | 1.402(4)        | 1.404(15)        | 1.392(10)        | 1.408(9)        |
| C <sub>α'</sub> -C <sub>m</sub>                   | 1.404(5)        | 1.403(4)        | 1.406(15)        | 1.399(10)        | 1.399(6)        |
| <b>ΔC<sub>β</sub> (Å)<sup>a</sup></b>             | <b>0.166</b>    | <b>0.072</b>    | <b>0.157</b>     | <b>1.10</b>      | <b>0.750</b>    |
| <b>Δ24 (Å)<sup>b</sup></b>                        | <b>0.095</b>    | <b>0.061</b>    | <b>0.095</b>     | <b>0.564</b>     | <b>0.367</b>    |
| <b>ΔMetal (Å)</b>                                 | <b>0.397</b>    | <b>0.295</b>    | <b>0.237</b>     | <b>0.035</b>     | -               |
| Bond Angle (deg)                                  |                 |                 |                  |                  |                 |
| <b>M-N-C<sub>α</sub></b>                          | <b>126.2(2)</b> | <b>126.0(2)</b> | <b>125.9(8)</b>  | <b>125.4(5)</b>  | -               |
| M-N'-C <sub>α</sub>                               | 125.9(2)        | 126.4(2)        | 125.7(8)         | <b>125.0(5)</b>  | -               |
| N-M-N                                             | 160.7(1)        | 167.9(1)        | 166.7(4)         | 169.8(3)         | -               |
| N'-M-N'                                           | 161.1(1)        | 166.1(1)        | 168.7(4)         | 170.2(2)         | -               |
| <b>N-C<sub>α</sub>-C<sub>m</sub></b>              | <b>125.0(3)</b> | <b>125.2(3)</b> | <b>125.4(10)</b> | <b>123.3(7)</b>  | <b>124.1(5)</b> |
| N'-C <sub>α'</sub> -C <sub>m</sub>                | 126.4(3)        | 126.6(3)        | 127.6(10)        | <b>122.9(7)</b>  | 125.9(5)        |
| N-C <sub>α</sub> -C <sub>β</sub>                  | 108.8(3)        | 108.9(3)        | 108.2(10)        | 109.0(6)         | 109.7(5)        |
| N'-C <sub>α'</sub> -C <sub>β'</sub>               | 109.5(3)        | 109.2(3)        | 108.6(10)        | 108.9(6)         | 106.0(5)        |
| <b>C<sub>β</sub>-C<sub>α</sub>-C<sub>m</sub></b>  | <b>126.1(3)</b> | <b>125.5(3)</b> | <b>126.3(10)</b> | <b>127.2(7)</b>  | <b>125.9(5)</b> |
| C <sub>β'</sub> -C <sub>α'</sub> -C <sub>m</sub>  | 124.0(3)        | 124.2(3)        | 123.8(10)        | <b>127.2(7)</b>  | 128.1(5)        |
| C <sub>α</sub> -C <sub>m</sub> -C <sub>α'</sub>   | 125.2(3)        | 125.0(3)        | 124.3(10)        | 120.3(7)         | 124.2(5)        |
| C <sub>α</sub> -C <sub>β</sub> -C <sub>β</sub>    | 107.5(3)        | 107.0(3)        | 107.7(10)        | 107.7(7)         | 106.9(5)        |
| C <sub>α'</sub> -C <sub>β'</sub> -C <sub>β'</sub> | 107.4(3)        | 107.4(3)        | 107.5(11)        | 107.3(7)         | 108.6(6)        |
| C <sub>α</sub> -N-C <sub>α</sub>                  | 107.5(3)        | 107.9(2)        | 108.0(9)         | 106.2(6)         | 106.3(4)        |
| C <sub>α'</sub> -N-C <sub>α'</sub>                | 106.3(3)        | 106.8(2)        | 107.8(9)         | 106.8(6)         | 110.8(4)        |

<sup>a</sup> ΔC<sub>β</sub> refers to the mean plane displacement of the β-pyrrole carbons

<sup>b</sup> Δ24 refers to the mean plane deviation of 24-atom core

**Figure S2.** B3LYP/LanLD2Z optimised geometries showing top as well as side views of **H<sub>2</sub>TPP(NO<sub>2</sub>)(CN)<sub>2</sub>** (**1a** and **1b**) and **H<sub>2</sub>TPP(NO<sub>2</sub>)(PE)<sub>2</sub>** (**1d** and **1e**), respectively. In side view, the  $\beta$ -substituents and *meso*-phenyl groups are not shown for clarity. The displacement of porphyrin-core atoms in Å from the mean plane are shown in figures **1c** and **1f** for **H<sub>2</sub>TPP(NO<sub>2</sub>)(CN)<sub>2</sub>** and **H<sub>2</sub>TPP(NO<sub>2</sub>)(PE)<sub>2</sub>**, respectively. Color codes for atoms: C (black), N (blue) and O (red).

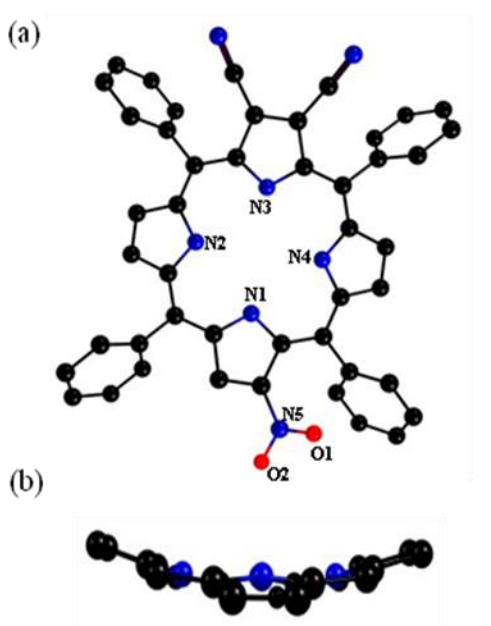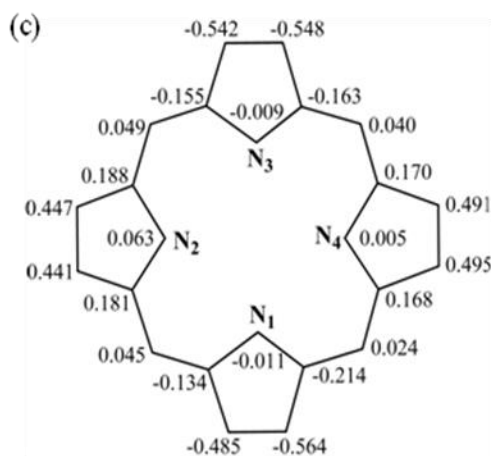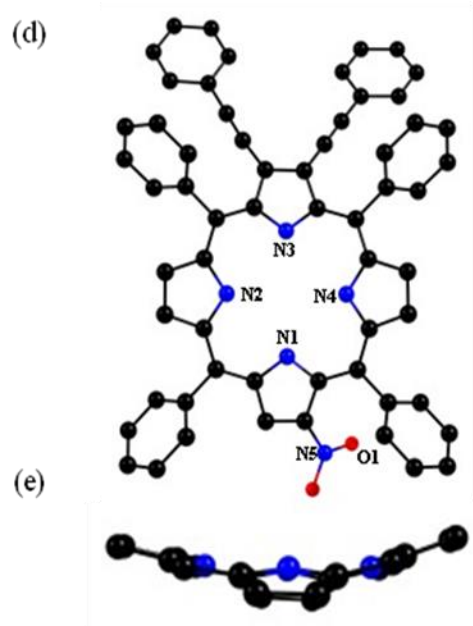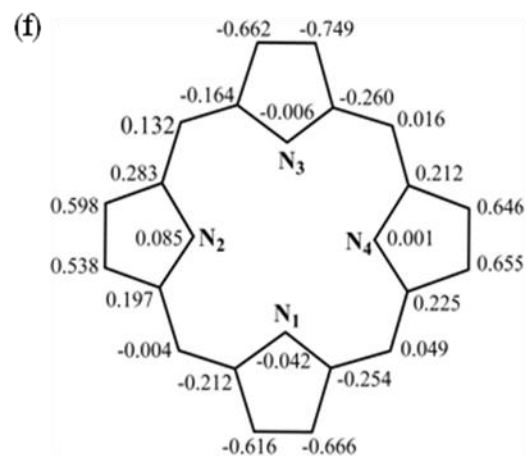



**Figure S3.** B3LYP/LanLD2Z optimised geometries showing top as well as side views of **H<sub>2</sub>TPP(NO<sub>2</sub>)Ph<sub>2</sub>** (**1a** and **1b**) and **H<sub>2</sub>TPP(NO<sub>2</sub>)Br<sub>2</sub>** (**1d** and **1e**), respectively. In side view, the  $\beta$ -substituents and *meso*-phenyl groups are not shown for clarity. The displacement of porphyrin-core atoms in Å from the mean plane are shown in figures **1c** and **1f** for **H<sub>2</sub>TPP(NO<sub>2</sub>)Ph<sub>2</sub>** and **H<sub>2</sub>TPP(NO<sub>2</sub>)Br<sub>2</sub>**, respectively. Color codes for atoms: C (black), N (blue), O (red) and Br (brown).

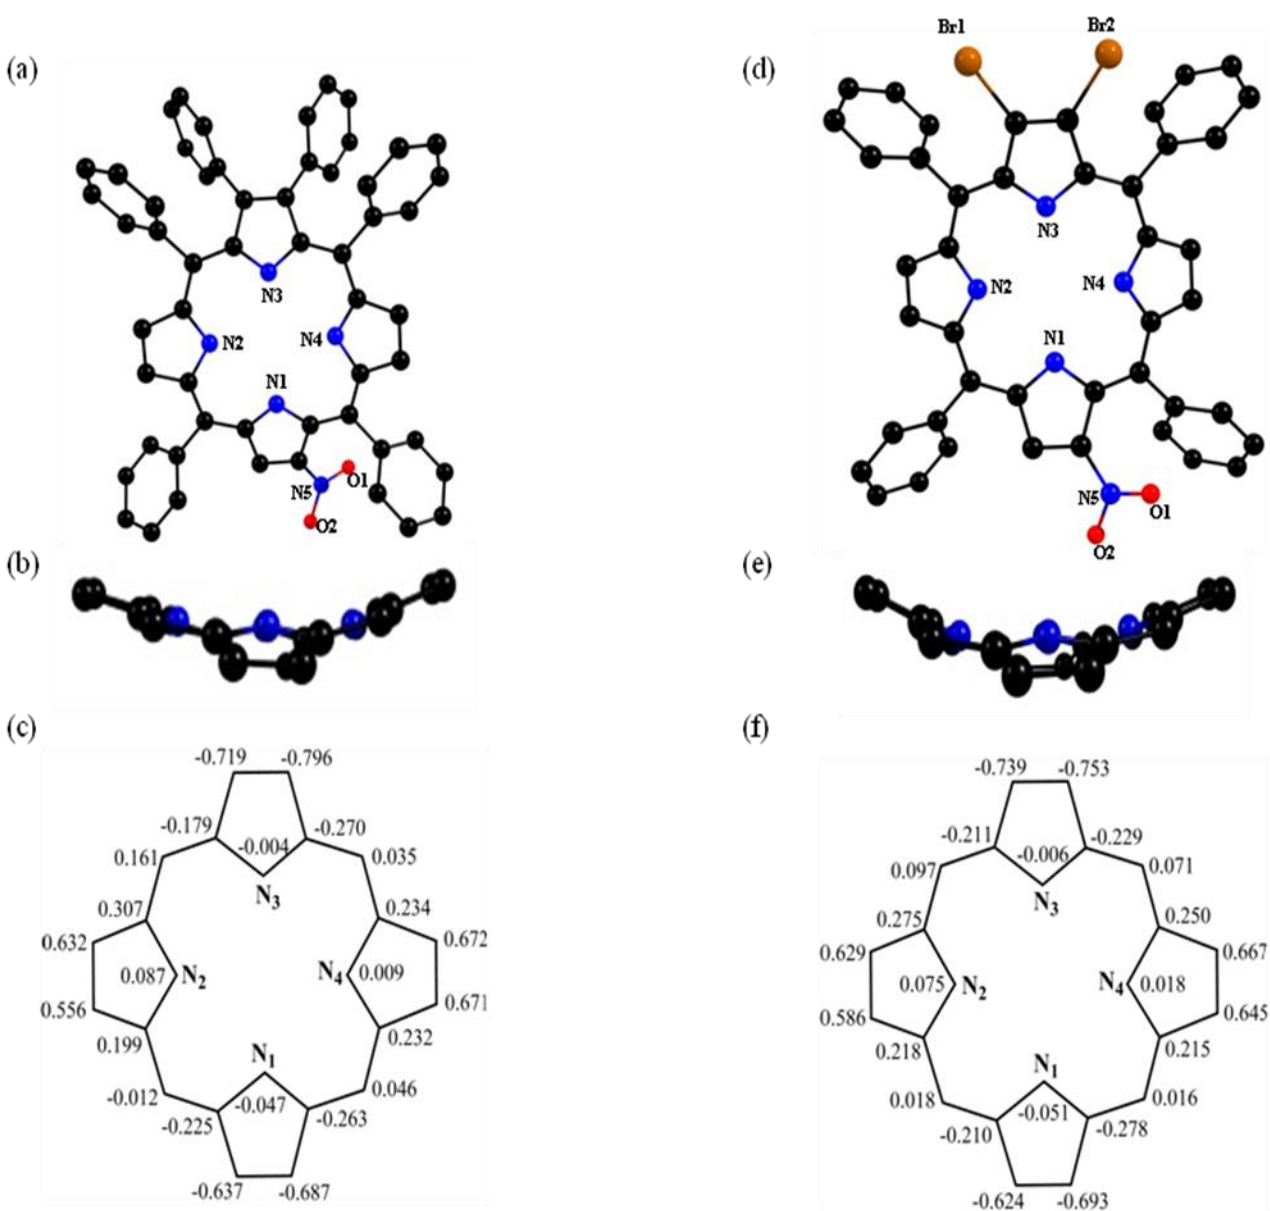

**Figure S4.** B3LYP/LanLD2Z optimised geometries showing top as well as side views of **H<sub>2</sub>TPP(NO<sub>2</sub>)(PE)<sub>6</sub>** (**1a** and **1b**) and **H<sub>2</sub>TPP(NO<sub>2</sub>)Ph<sub>6</sub>** (**1d** and **1e**), respectively. In side view, the  $\beta$ -substituents and *meso*-phenyl groups are not shown for clarity. The displacement of porphyrin-core atoms in Å from the mean plane are shown in figures **1c** and **1f** for **H<sub>2</sub>TPP(NO<sub>2</sub>)(PE)<sub>6</sub>** and **H<sub>2</sub>TPP(NO<sub>2</sub>)Ph<sub>6</sub>**, respectively. Color codes for atoms: C (black), N (blue) and O (red).

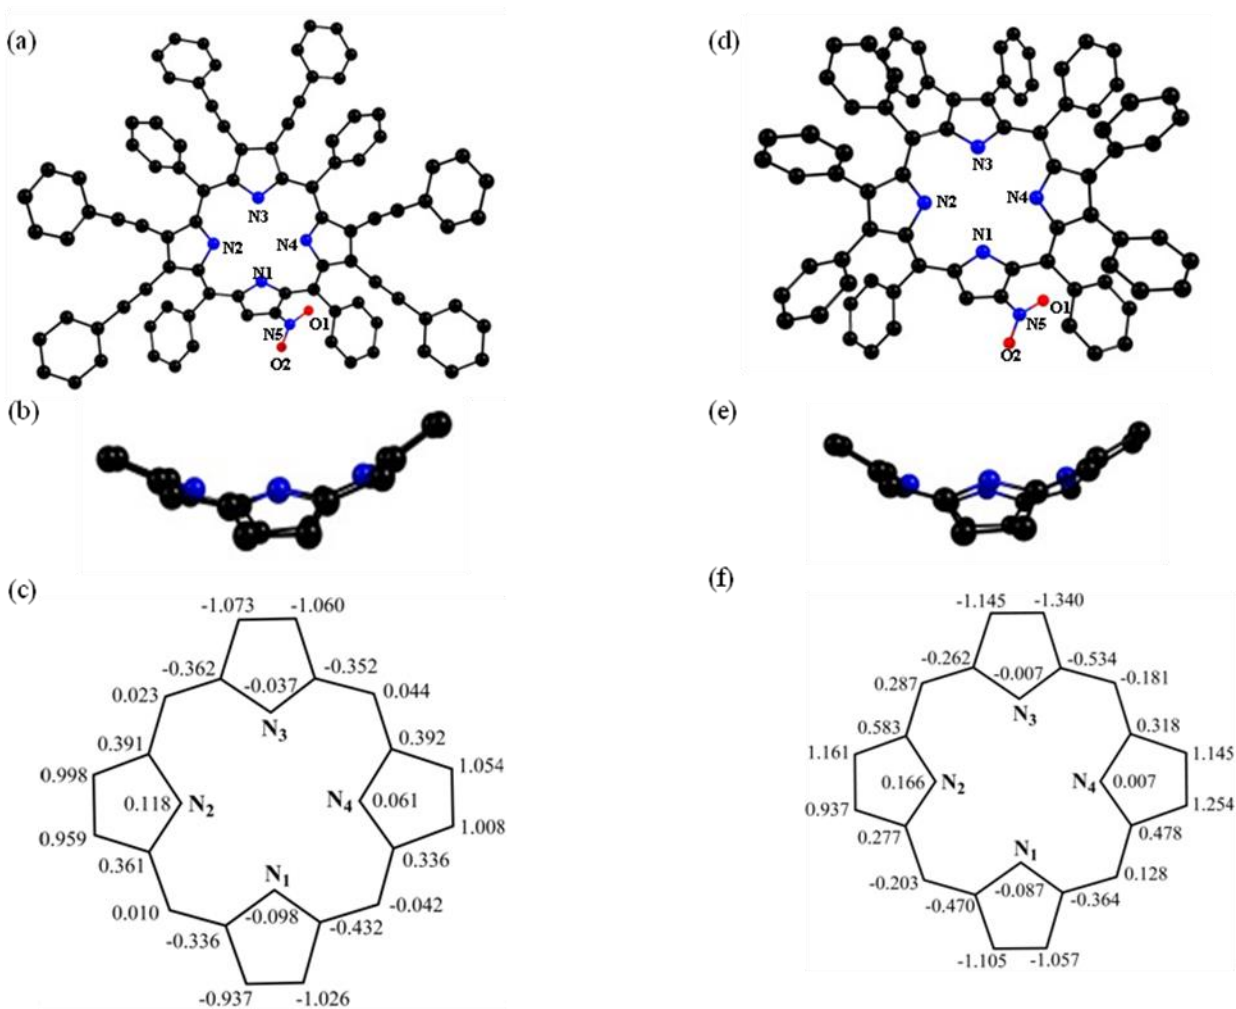

**Table S3.** Selected bond lengths (Å) and bond angles (°) for the B3LYP/LanLD2Z optimised geometries of H<sub>2</sub>TPP(NO<sub>2</sub>)X<sub>2</sub> (X = CN, PE, Br, Ph and Th).

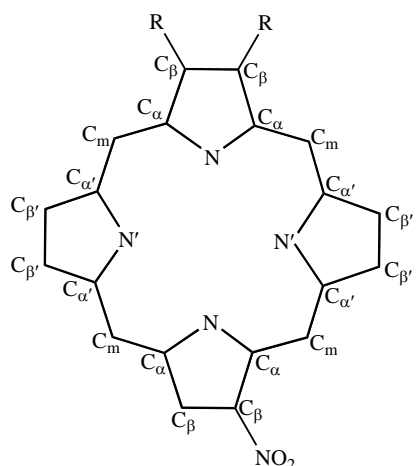

R = CN, PE, Br, Ph and Th

|                                                   | H <sub>2</sub> TPP(NO <sub>2</sub> )<br>(CN) <sub>2</sub> | H <sub>2</sub> TPP(NO <sub>2</sub> )<br>(PE) <sub>2</sub> | H <sub>2</sub> TPP(NO <sub>2</sub> )<br>Br <sub>2</sub> | H <sub>2</sub> TPP(NO <sub>2</sub> )<br>(Ph) <sub>2</sub> | H <sub>2</sub> TPP(NO <sub>2</sub> )<br>(Th) <sub>2</sub> |
|---------------------------------------------------|-----------------------------------------------------------|-----------------------------------------------------------|---------------------------------------------------------|-----------------------------------------------------------|-----------------------------------------------------------|
| Bond Length (Å)                                   |                                                           |                                                           |                                                         |                                                           |                                                           |
| N-C <sub>α</sub>                                  | 1.386                                                     | 1.387                                                     | 1.389                                                   | 1.388                                                     | 1.387                                                     |
| N'-C <sub>α</sub>                                 | 1.392                                                     | 1.393                                                     | 1.392                                                   | 1.392                                                     | 1.392                                                     |
| C <sub>α</sub> -C <sub>β</sub>                    | 1.467                                                     | 1.471                                                     | 1.460                                                   | 1.472                                                     | 1.471                                                     |
| C <sub>α'</sub> -C <sub>β'</sub>                  | 1.447                                                     | 1.447                                                     | 1.394                                                   | 1.447                                                     | 1.447                                                     |
| C <sub>β</sub> -C <sub>β'</sub>                   | 1.382                                                     | 1.390                                                     | 1.375                                                   | 1.380                                                     | 1.384                                                     |
| C <sub>β'</sub> -C <sub>β'</sub>                  | 1.380                                                     | 1.380                                                     | 1.380                                                   | 1.381                                                     | 1.381                                                     |
| C <sub>α</sub> -C <sub>m</sub>                    | 1.423                                                     | 1.423                                                     | 1.420                                                   | 1.424                                                     | 1.425                                                     |
| C <sub>α'</sub> -C <sub>m</sub>                   | 1.411                                                     | 1.413                                                     | 1.413                                                   | 1.412                                                     | 1.413                                                     |
| ΔC <sub>β</sub> (Å) <sup>a</sup>                  | <b>0.501</b>                                              | <b>0.641</b>                                              | <b>0.667</b>                                            | <b>0.671</b>                                              | <b>0.727</b>                                              |
| Δ24 (Å) <sup>b</sup>                              | <b>0.234</b>                                              | <b>0.294</b>                                              | <b>0.315</b>                                            | <b>0.320</b>                                              | <b>0.344</b>                                              |
| Bond Angle (deg)                                  |                                                           |                                                           |                                                         |                                                           |                                                           |
| N-C <sub>α</sub> -C <sub>m</sub>                  | <b>125.7</b>                                              | <b>124.7</b>                                              | <b>124.7</b>                                            | <b>124.6</b>                                              | <b>124.5</b>                                              |
| N'-C <sub>α'</sub> -C <sub>m</sub>                | 127.2                                                     | 127.1                                                     | 127.0                                                   | 126.7                                                     | 126.6                                                     |
| N-C <sub>α</sub> -C <sub>β</sub>                  | 109.5                                                     | 109.8                                                     | 109.2                                                   | 109.9                                                     | 109.9                                                     |
| N'-C <sub>α'</sub> -C <sub>β'</sub>               | 106.5                                                     | 106.4                                                     | 106.4                                                   | 106.4                                                     | 106.3                                                     |
| C <sub>β</sub> -C <sub>α</sub> -C <sub>m</sub>    | <b>124.7</b>                                              | <b>125.3</b>                                              | <b>125.9</b>                                            | <b>125.3</b>                                              | <b>125.4</b>                                              |
| C <sub>β'</sub> -C <sub>α'</sub> -C <sub>m</sub>  | 126.3                                                     | 126.5                                                     | 126.6                                                   | 126.9                                                     | 127.1                                                     |
| C <sub>α</sub> -C <sub>m</sub> -C <sub>α'</sub>   | 124.0                                                     | 123.9                                                     | 123.8                                                   | 123.8                                                     | 123.5                                                     |
| C <sub>α</sub> -C <sub>β</sub> -C <sub>β'</sub>   | 106.8                                                     | 106.6                                                     | 107.0                                                   | 106.6                                                     | 106.6                                                     |
| C <sub>α'</sub> -C <sub>β'</sub> -C <sub>β'</sub> | 108.3                                                     | 108.3                                                     | 108.2                                                   | 108.2                                                     | 108.3                                                     |
| C <sub>α</sub> -N-C <sub>α</sub>                  | 107.1                                                     | 106.9                                                     | 107.2                                                   | 106.5                                                     | 106.7                                                     |
| C <sub>α'</sub> -N-C <sub>α'</sub>                | 110.4                                                     | 110.5                                                     | 110.6                                                   | 110.6                                                     | 110.6                                                     |

<sup>a</sup> ΔC<sub>β</sub> refers to the mean plane displacement of the β-pyrrole carbons

<sup>b</sup> Δ24 refers to the mean plane deviation of 24-atom core

**Table S4.** Selected bond lengths (Å) and bond angles (°) for the B3LYP/LanLD2Z optimised geometries of H<sub>2</sub>TPP(NO<sub>2</sub>)X<sub>6</sub> (X = PE, Br, Ph and Th).

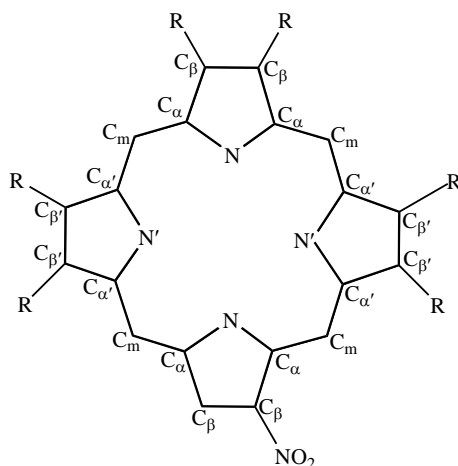

R = PE, Br, Ph and Th

|                                                   | H <sub>2</sub> TPP(NO <sub>2</sub> )(PE) <sub>6</sub> | H <sub>2</sub> TPP(NO <sub>2</sub> )Br <sub>6</sub> | H <sub>2</sub> TPP(NO <sub>2</sub> )Ph <sub>6</sub> | H <sub>2</sub> TPP(NO <sub>2</sub> )(Th) <sub>6</sub> |
|---------------------------------------------------|-------------------------------------------------------|-----------------------------------------------------|-----------------------------------------------------|-------------------------------------------------------|
| Bond Length (Å)                                   |                                                       |                                                     |                                                     |                                                       |
| N-C <sub>α</sub>                                  | 1.387                                                 | 1.388                                               | 1.386                                               | 1.385                                                 |
| N'-C <sub>α</sub>                                 | 1.389                                                 | 1.391                                               | 1.387                                               | 1.386                                                 |
| C <sub>α</sub> -C <sub>β</sub>                    | 1.470                                                 | 1.470                                               | 1.473                                               | 1.473                                                 |
| C <sub>α'</sub> -C <sub>β'</sub>                  | 1.453                                                 | 1.451                                               | 1.457                                               | 1.456                                                 |
| C <sub>β</sub> -C <sub>β</sub>                    | 1.388                                                 | 1.375                                               | 1.382                                               | 1.385                                                 |
| C <sub>β'</sub> -C <sub>β'</sub>                  | 1.417                                                 | 1.391                                               | 1.404                                               | 1.410                                                 |
| C <sub>α</sub> -C <sub>m</sub>                    | 1.425                                                 | 1.425                                               | 1.427                                               | 1.428                                                 |
| C <sub>α'</sub> -C <sub>m</sub>                   | 1.415                                                 | 1.419                                               | 1.419                                               | 1.421                                                 |
| $\Delta C_{\beta}$ (Å)                            | <b>1.014</b>                                          | <b>1.152</b>                                        | <b>1.143</b>                                        | <b>1.240</b>                                          |
| $\Delta 24$ (Å)                                   | <b>0.479</b>                                          | <b>0.542</b>                                        | <b>0.562</b>                                        | <b>0.581</b>                                          |
| Bond Angle (deg)                                  |                                                       |                                                     |                                                     |                                                       |
| N-C <sub>α</sub> -C <sub>m</sub>                  | <b>124.6</b>                                          | <b>124.0</b>                                        | <b>123.8</b>                                        | <b>123.4</b>                                          |
| N'-C <sub>α'</sub> -C <sub>m</sub>                | <b>124.5</b>                                          | <b>123.8</b>                                        | <b>123.2</b>                                        | <b>123.1</b>                                          |
| N-C <sub>α</sub> -C <sub>β</sub>                  | 109.7                                                 | 109.2                                               | 109.8                                               | 109.6                                                 |
| N'-C <sub>α'</sub> -C <sub>β'</sub>               | 106.1                                                 | 105.2                                               | 106.3                                               | 106.2                                                 |
| C <sub>β</sub> -C <sub>α</sub> -C <sub>m</sub>    | <b>125.5</b>                                          | <b>126.5</b>                                        | <b>126.2</b>                                        | <b>126.7</b>                                          |
| C <sub>β'</sub> -C <sub>α'</sub> -C <sub>m</sub>  | <b>129.2</b>                                          | <b>130.8</b>                                        | <b>130.3</b>                                        | <b>130.6</b>                                          |
| C <sub>α</sub> -C <sub>m</sub> -C <sub>α'</sub>   | 123.0                                                 | 122.2                                               | 122.3                                               | 121.7                                                 |
| C <sub>α</sub> -C <sub>β</sub> -C <sub>β</sub>    | 106.1                                                 | 107.0                                               | 106.6                                               | 106.6                                                 |
| C <sub>α'</sub> -C <sub>β'</sub> -C <sub>β'</sub> | 107.7                                                 | 108.4                                               | 107.8                                               | 107.7                                                 |
| C <sub>α</sub> -N-C <sub>α</sub>                  | 107.0                                                 | 107.3                                               | 106.8                                               | 107.8                                                 |
| C <sub>α'</sub> -N-C <sub>α'</sub>                | 111.9                                                 | 112.2                                               | 111.5                                               | 111.8                                                 |

<sup>a</sup>  $\Delta C_{\beta}$  refers to the mean plane displacement of the  $\beta$ -pyrrole carbons

<sup>b</sup>  $\Delta 24$  refers to the mean plane deviation of 24-atom core

**Table S5.** Optical absorption spectral data of metal complexes of mixed substituted porphyrins

| <b>Porphyrin</b>                         | <b>B band(s), nm</b> | <b>Q band(s), nm</b> |
|------------------------------------------|----------------------|----------------------|
| CoTPP(NO <sub>2</sub> )                  | 382(sh), 420(5.08)   | 540(4.03), 578(3.94) |
| CoTPP(NO <sub>2</sub> )Br <sub>2</sub>   | 383(sh), 431(5.04)   | 551(3.94), 595(4.02) |
| CoTPP(NO <sub>2</sub> )Ph <sub>2</sub>   | 388(sh), 434(4.98)   | 553(3.96), 593(3.98) |
| CoTPP(NO <sub>2</sub> )(PE) <sub>2</sub> | 441(5.16)            | 609(4.30)            |
| CoTPP(NO <sub>2</sub> )Th <sub>2</sub>   | 435(5.07)            | 602(4.13)            |
| CoTPP(NO <sub>2</sub> )(CN) <sub>2</sub> | 431(5.18)            | 609(4.39)            |
| CoTPP(NO <sub>2</sub> )Br <sub>6</sub>   | 453(5.11)            | 567(4.07)            |
| CoTPP(NO <sub>2</sub> )Ph <sub>6</sub>   | 400(sh), 454(5.01)   | 570(4.00), 611(3.96) |
| CoTPP(NO <sub>2</sub> )(PE) <sub>6</sub> | 487(5.29)            | 597(4.39)            |
| CoTPP(NO <sub>2</sub> )Th <sub>6</sub>   | 464(5.00)            | 580(4.13), 627(3.96) |
| NiTPP(NO <sub>2</sub> )                  | 386(sh), 428(5.14)   | 539(4.07), 583(3.97) |
| NiTPP(NO <sub>2</sub> )Br <sub>2</sub>   | 385(sh), 437(5.17)   | 548(4.02), 597(4.11) |
| NiTPP(NO <sub>2</sub> )Ph <sub>2</sub>   | 389(sh), 440(5.10)   | 550(4.04), 598(4.07) |
| NiTPP(NO <sub>2</sub> )(PE) <sub>2</sub> | 446(5.23)            | 561(4.06), 614(4.94) |
| NiTPP(NO <sub>2</sub> )Th <sub>2</sub>   | 323(4.26), 441(5.12) | 555(4.03), 605(4.17) |
| NiTPP(NO <sub>2</sub> )(CN) <sub>2</sub> | 435(5.25)            | 612(4.47)            |
| NiTPP(NO <sub>2</sub> )Br <sub>6</sub>   | 348(4.36), 454(5.22) | 565(4.16), 603(3.90) |
| NiTPP(NO <sub>2</sub> )Ph <sub>6</sub>   | 456(5.04)            | 569(4.03), 621(3.99) |
| NiTPP(NO <sub>2</sub> )(PE) <sub>6</sub> | 489(5.30)            | 598(4.43), 638(4.16) |
| NiTPP(NO <sub>2</sub> )Th <sub>6</sub>   | 466(5.09)            | 580(4.17), 631(4.09) |
| CuTPP(NO <sub>2</sub> )                  | 380(sh), 422(5.26)   | 547(4.15), 589(3.96) |
| CuTPP(NO <sub>2</sub> )Br <sub>2</sub>   | 430(5.23)            | 556(4.02), 600(4.05) |
| CuTPP(NO <sub>2</sub> )Ph <sub>2</sub>   | 384(sh), 432(5.18)   | 556(4.06), 601(4.00) |
| CuTPP(NO <sub>2</sub> )(PE) <sub>2</sub> | 442(5.28)            | 565(4.05), 613(4.30) |
| CuTPP(NO <sub>2</sub> )Th <sub>2</sub>   | 433(5.23)            | 561(4.07), 608(4.14) |

|                                                                                  |                      |                      |
|----------------------------------------------------------------------------------|----------------------|----------------------|
| CuTPP(NO <sub>2</sub> )(CN) <sub>2</sub>                                         | 434(5.41)            | 571(3.99), 618(4.58) |
| CuTPP(NO <sub>2</sub> )Br <sub>6</sub>                                           | 361(4.34), 461(5.01) | 584(4.07), 625(3.80) |
| CuTPP(NO <sub>2</sub> )Ph <sub>6</sub>                                           | 450(5.01)            | 582(4.02), 630(3.90) |
| CuTPP(NO <sub>2</sub> )(PE) <sub>6</sub>                                         | 493(5.28)            | 610(4.43)            |
| CuTPP(NO <sub>2</sub> )Th <sub>6</sub>                                           | 460(4.81)            | 596(3.93), 639(3.72) |
| ZnTPP(NO <sub>2</sub> )                                                          | 426(5.23)            | 556(4.07), 599(3.90) |
| ZnTPP(NO <sub>2</sub> )Br <sub>2</sub>                                           | 340(4.29), 433(5.36) | 562(4.12), 606(4.10) |
| ZnTPP(NO <sub>2</sub> )Ph <sub>2</sub>                                           | 435(5.27)            | 561(4.12), 607(4.00) |
| ZnTPP(NO <sub>2</sub> )(PE) <sub>2</sub>                                         | 446(5.38)            | 573(4.16), 620(4.35) |
| ZnTPP(NO <sub>2</sub> )Th <sub>2</sub>                                           | 437(5.25)            | 564(4.07), 612(4.08) |
| ZnTPP(NO <sub>2</sub> )(CN) <sub>2</sub>                                         | 442(5.42)            | 634(4.47)            |
| ZnTPP(NO <sub>2</sub> )Br <sub>6</sub>                                           | 377(4.38), 476(5.00) | 600(sh), 682(4.11)   |
| ZnTPP(NO <sub>2</sub> )Ph <sub>6</sub>                                           | 379(4.37), 467(5.07) | 595(3.90), 648(3.86) |
| ZnTPP(NO <sub>2</sub> )(PE) <sub>6</sub>                                         | 494(5.35)            | 613(4.35), 696(sh)   |
| ZnTPP(NO <sub>2</sub> )Th <sub>6</sub>                                           | 476(5.06)            | 607(4.01), 663(3.92) |
| Values in parentheses refer to log ε (ε in Mol <sup>-1</sup> cm <sup>-1</sup> ). |                      |                      |

**Table S6.** Fluorescence Spectral data of mixed substituted porphyrins in CH<sub>2</sub>Cl<sub>2</sub> at 298 K.

| Porphyrin                                             | $\lambda_{\text{Ex}}$ nm | $\lambda_{\text{fl,max}}$ nm | Quantum Yield, $\phi_f$ | Stoke shift (nm) | Stokes shift (cm <sup>-1</sup> ) |
|-------------------------------------------------------|--------------------------|------------------------------|-------------------------|------------------|----------------------------------|
| H <sub>2</sub> TPP(NO <sub>2</sub> )Ph <sub>2</sub>   | 439                      | 756                          | 0.0167                  | 70               | 1350                             |
| H <sub>2</sub> TPP(NO <sub>2</sub> )(PE) <sub>2</sub> | 444                      | 746                          | 0.0180                  | 59               | 1151                             |
| H <sub>2</sub> TPP(NO <sub>2</sub> )Th <sub>2</sub>   | 440                      | 768, 805(sh)                 | 0.0092                  | 73               | 1367                             |
| H <sub>2</sub> TPP(NO <sub>2</sub> )(CN) <sub>2</sub> | 440                      | 728                          | 0.0582                  | 26               | 509                              |
| H <sub>2</sub> TPP(NO <sub>2</sub> )(PE) <sub>6</sub> | 494                      | 813                          | 0.0023                  | 62               | 1016                             |
| ZnTPP(NO <sub>2</sub> )Ph <sub>2</sub>                | 435                      | 709                          | 0.0110                  | 102              | 2370                             |
| ZnTPP(NO <sub>2</sub> )(PE) <sub>2</sub>              | 446                      | 687                          | 0.0160                  | 67               | 1573                             |
| ZnTPP(NO <sub>2</sub> )Th <sub>2</sub>                | 437                      | 712                          | 0.0100                  | 100              | 2295                             |
| ZnTPP(NO <sub>2</sub> )(CN) <sub>2</sub>              | 442                      | 662                          | 0.0334                  | 28               | 667                              |
| ZnTPP(NO <sub>2</sub> )(PE) <sub>6</sub>              | 494                      | 737                          | 0.0051                  | 41               | 799                              |

**Figure S5.** Electronic absorption spectra of H<sub>2</sub>TPP(NO<sub>2</sub>)X<sub>2</sub> (X = H, CN, PE) derivatives in CH<sub>2</sub>Cl<sub>2</sub> at 298 K. Q bands are magnified 3 times.

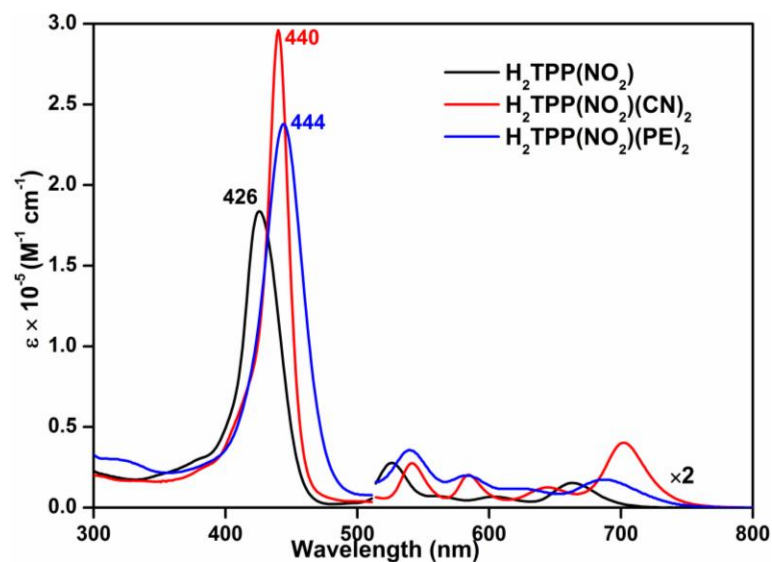

**Figure S6.** UV- Visible spectra of  $\text{H}_2\text{TPP}(\text{NO}_2)\text{X}_6$  ( $\text{X} = \text{H}, \text{Ph}, \text{Th}, \text{PE}$ ) derivatives in  $\text{CH}_2\text{Cl}_2$  at 298 K. Q bands are magnified 3 times.

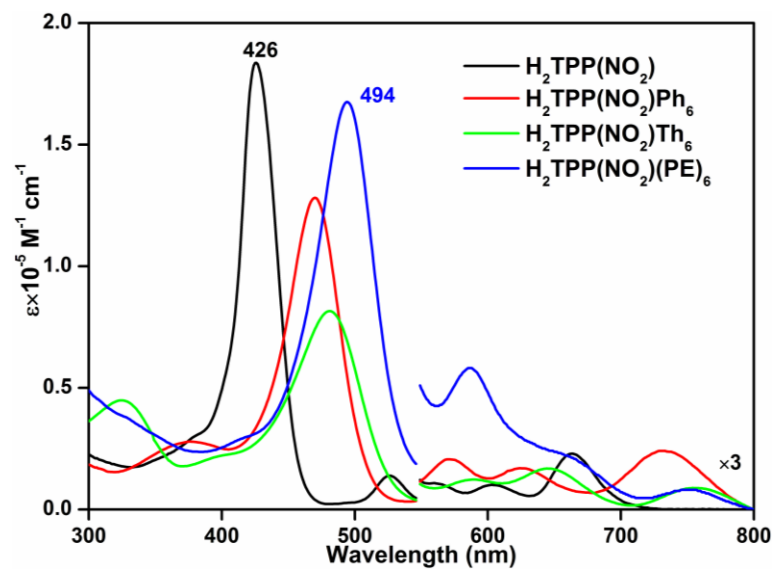

**Figure S7.** Fluorescence spectra of  $\text{H}_2\text{TPP}(\text{NO}_2)\text{Th}_n$  ( $n = 0, 2, 6$ ) in  $\text{CH}_2\text{Cl}_2$  at 298 K.

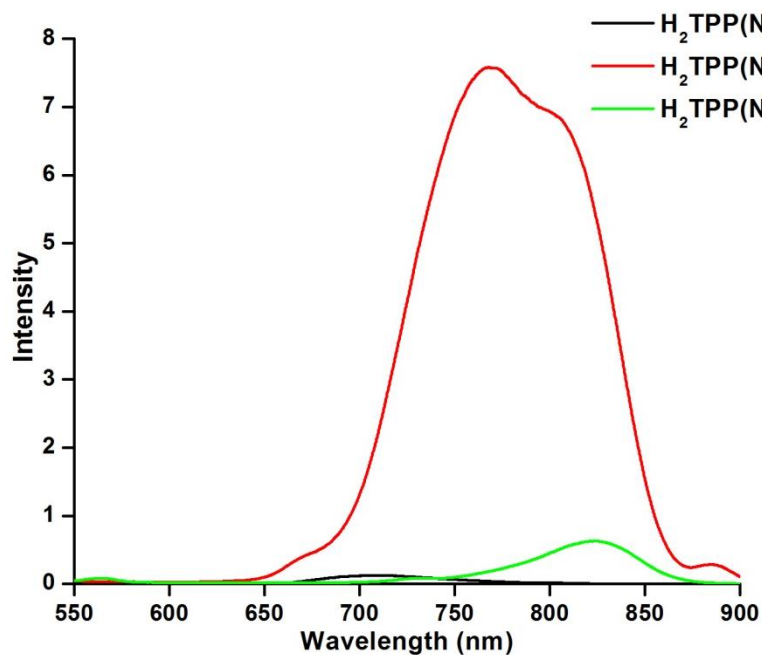



**Figure S8.** Emission spectra of (a)  $\text{MTPP}(\text{NO}_2)(\text{CN})_2$  and (b)  $\text{MTPP}(\text{NO}_2)(\text{C}_6\text{H}_5)_2$ , where  $\text{M} = 2\text{H}$  and  $\text{Zn}(\text{II})$  in  $\text{CH}_2\text{Cl}_2$  at 298 K.

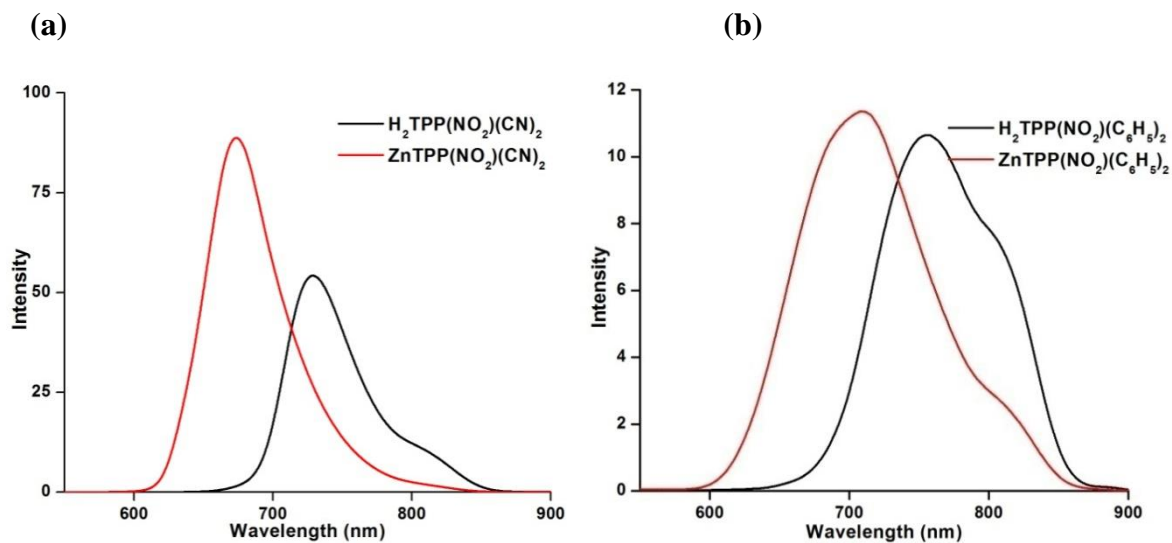

**Figure S9.** Fluorescence spectra of (a)  $\text{MTPP}(\text{NO}_2)(\text{PE})_2$  and (b)  $\text{MTPP}(\text{NO}_2)(\text{PE})_6$  ( $\text{M} = 2\text{H}$ ,  $\text{Zn}(\text{II})$ ) in  $\text{CH}_2\text{Cl}_2$  at 298 K.

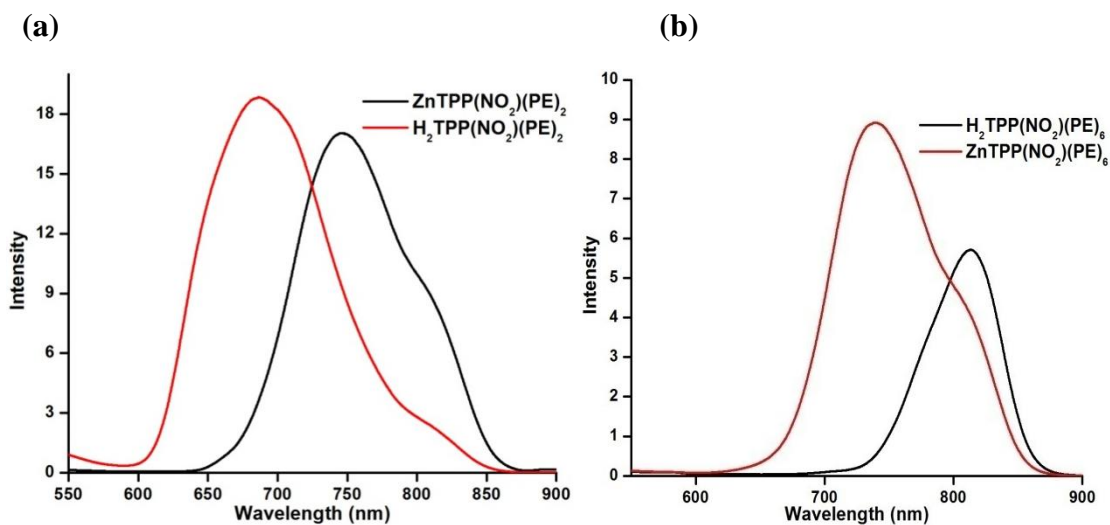

**Figure S10.**  $^1\text{H}$  NMR spectrum of  $\text{H}_2\text{TPP}(\text{NO}_2)\text{Br}_2$  in  $\text{CDCl}_3$  at 298 K.

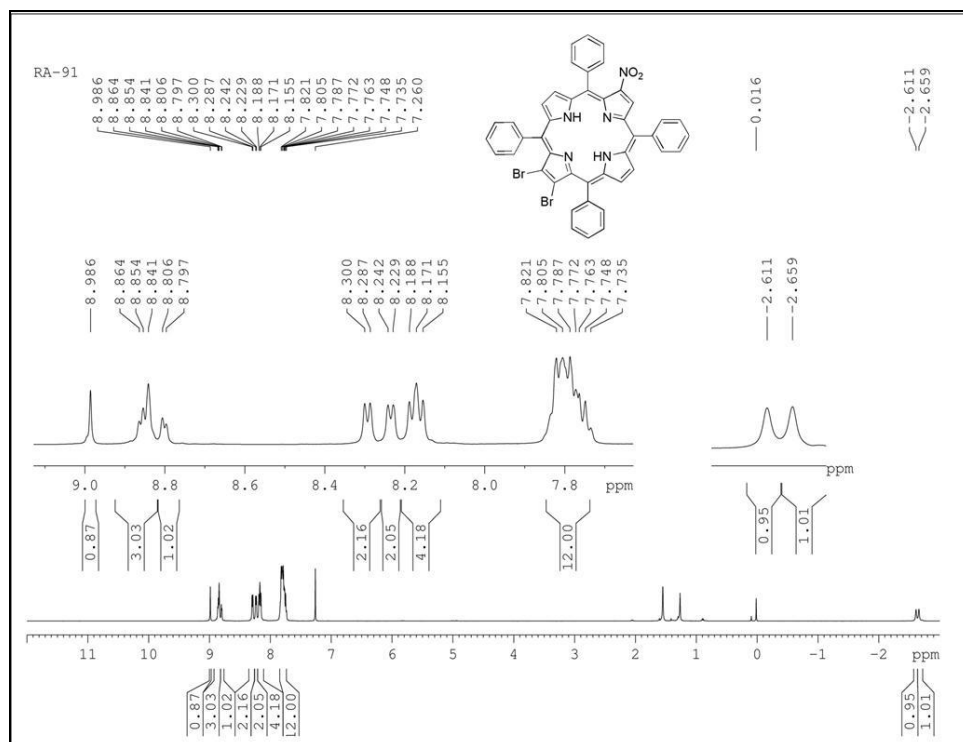

**Figure S11.**  $^1\text{H}$  NMR spectrum of  $\text{NiTPP}(\text{NO}_2)\text{Br}_2$  in  $\text{CDCl}_3$ .

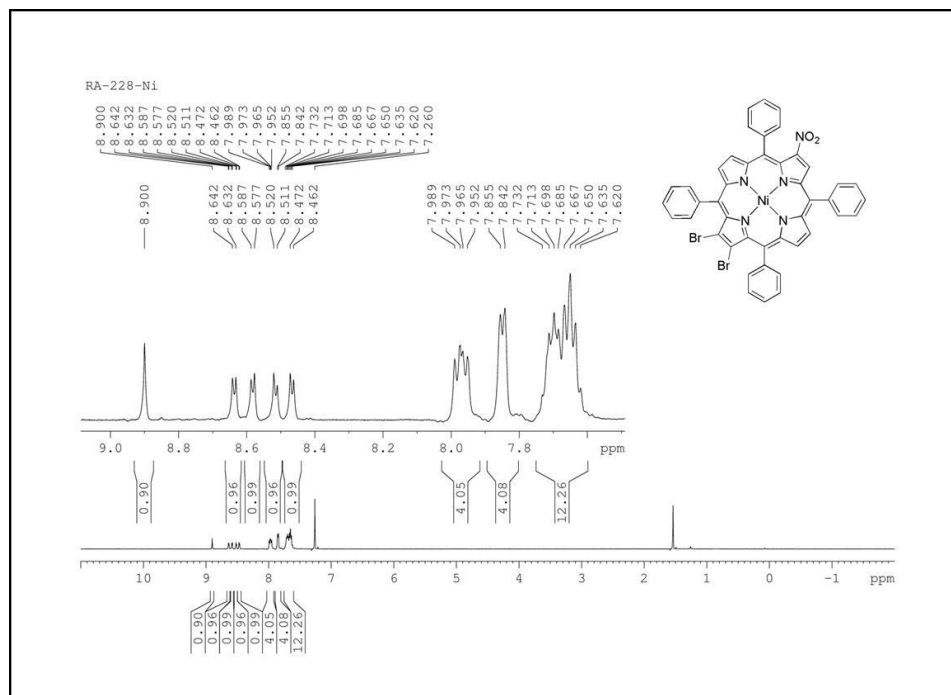

**Figure S12.**  $^1\text{H}$  NMR spectrum of  $\text{ZnTPP}(\text{NO}_2)\text{Br}_2$  in  $\text{CDCl}_3$ .

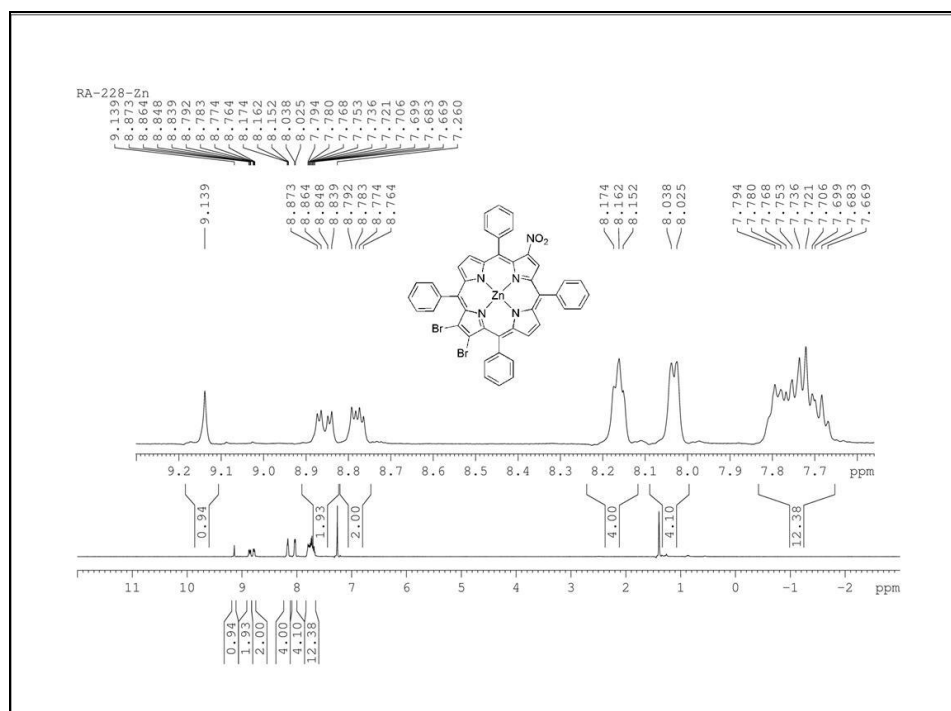

**Figure S13.**  $^1\text{H}$  NMR spectrum of  $\text{H}_2\text{TPP}(\text{NO}_2)\text{Ph}_2$  in  $\text{CDCl}_3$ .

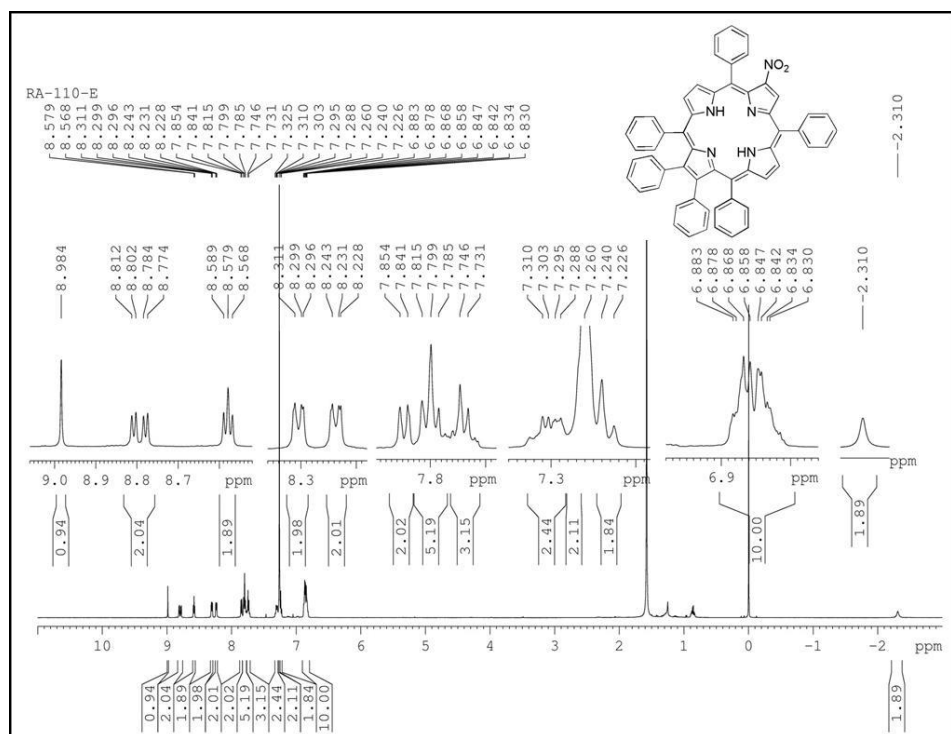

[illegible]

Chemical structure of RA-111-C-RE is shown in the top right corner. The structure is a zinc phthalocyanine derivative with a nitro group (NO<sub>2</sub>) and a phenyl group attached to the central zinc atom.

<sup>1</sup>H NMR spectrum (CDCl<sub>3</sub>) of RA-111-C-RE. The spectrum shows peaks in the aromatic region (6.5-9.1 ppm) and a reference peak at 0 ppm. Integration values are provided below the baseline.

Chemical shift (ppm): 9.117, 8.805, 8.795, 8.760, 8.751, 8.527, 8.523, 8.518, 8.513, 8.214, 8.200, 8.187, 8.174, 8.168, 8.153, 8.148, 8.138, 8.133, 8.127, 8.122, 8.117, 8.112, 8.107, 8.102, 8.097, 8.092, 8.087, 8.082, 8.077, 8.072, 8.067, 8.062, 8.057, 8.052, 8.047, 8.042, 8.037, 8.032, 8.027, 8.022, 8.017, 8.012, 8.007, 8.002, 7.997, 7.992, 7.987, 7.982, 7.977, 7.972, 7.967, 7.962, 7.957, 7.952, 7.947, 7.942, 7.937, 7.932, 7.927, 7.922, 7.917, 7.912, 7.907, 7.902, 7.897, 7.892, 7.887, 7.882, 7.877, 7.872, 7.867, 7.862, 7.857, 7.852, 7.847, 7.842, 7.837, 7.832, 7.827, 7.822, 7.817, 7.812, 7.807, 7.802, 7.797, 7.792, 7.787, 7.782, 7.777, 7.772, 7.767, 7.762, 7.757, 7.752, 7.747, 7.742, 7.737, 7.732, 7.727, 7.722, 7.717, 7.712, 7.707, 7.702, 7.697, 7.692, 7.687, 7.682, 7.677, 7.672, 7.667, 7.662, 7.657, 7.652, 7.647, 7.642, 7.637, 7.632, 7.627, 7.622, 7.617, 7.612, 7.607, 7.602, 7.597, 7.592, 7.587, 7.582, 7.577, 7.572, 7.567, 7.562, 7.557, 7.552, 7.547, 7.542, 7.537, 7.532, 7.527, 7.522, 7.517, 7.512, 7.507, 7.502, 7.497, 7.492, 7.487, 7.482, 7.477, 7.472, 7.467, 7.462, 7.457, 7.452, 7.447, 7.442, 7.437, 7.432, 7.427, 7.422, 7.417, 7.412, 7.407, 7.402, 7.397, 7.392, 7.387, 7.382, 7.377, 7.372, 7.367, 7.362, 7.357, 7.352, 7.347, 7.342, 7.337, 7.332, 7.327, 7.322, 7.317, 7.312, 7.307, 7.302, 7.297, 7.292, 7.287, 7.282, 7.277, 7.272, 7.267, 7.262, 7.257, 7.252, 7.247, 7.242, 7.237, 7.232, 7.227, 7.222, 7.217, 7.212, 7.207, 7.202, 7.197, 7.192, 7.187, 7.182, 7.177, 7.172, 7.167, 7.162, 7.157, 7.152, 7.147, 7.142, 7.137, 7.132, 7.127, 7.122, 7.117, 7.112, 7.107, 7.102, 7.097, 7.092, 7.087, 7.082, 7.077, 7.072, 7.067, 7.062, 7.057, 7.052, 7.047, 7.042, 7.037, 7.032, 7.027, 7.022, 7.017, 7.012, 7.007, 7.002, 6.997, 6.992, 6.987, 6.982, 6.977, 6.972, 6.967, 6.962, 6.957, 6.952, 6.947, 6.942, 6.937, 6.932, 6.927, 6.922, 6.917, 6.912, 6.907, 6.902, 6.897, 6.892, 6.887, 6.882, 6.877, 6.872, 6.867, 6.862, 6.857, 6.852, 6.847, 6.842, 6.837, 6.832, 6.827, 6.822, 6.817, 6.812, 6.807, 6.802, 6.797, 6.792, 6.787, 6.782, 6.777, 6.772, 6.767, 6.762, 6.757, 6.752, 6.747, 6.742, 6.737, 6.732, 6.727, 6.722, 6.717, 6.712, 6.707, 6.702, 6.697, 6.692, 6.687, 6.682, 6.677, 6.672, 6.667, 6.662, 6.657, 6.652, 6.647, 6.642, 6.637, 6.632, 6.627, 6.622, 6.617, 6.612, 6.607, 6.602, 6.597, 6.592, 6.587, 6.582, 6.577, 6.572, 6.567, 6.562, 6.557, 6.552, 6.547, 6.542, 6.537, 6.532, 6.527, 6.522, 6.517, 6.512, 6.507, 6.502, 6.497, 6.492, 6.487, 6.482, 6.477, 6.472, 6.467, 6.462, 6.457, 6.452, 6.447, 6.442, 6.437, 6.432, 6.427, 6.422, 6.417, 6.412, 6.407, 6.402, 6.397, 6.392, 6.387, 6.382, 6.377, 6.372, 6.367, 6.362, 6.357, 6.352, 6.347, 6.342, 6.337, 6.332, 6.327, 6.322, 6.317, 6.312, 6.307, 6.302, 6.297, 6.292, 6.287, 6.282, 6.277, 6.272, 6.267, 6.262, 6.257, 6.252, 6.247, 6.242, 6.237, 6.232, 6.227, 6.222, 6.217, 6.212, 6.207, 6.202, 6.197, 6.192, 6.187, 6.182, 6.177, 6.172, 6.167, 6.162, 6.157, 6.152, 6.147, 6.142, 6.137, 6.132, 6.127, 6.122, 6.117, 6.112, 6.107, 6.102, 6.097, 6.092, 6.087, 6.082, 6.077, 6.072, 6.067, 6.062, 6.057, 6.052, 6.047, 6.042, 6.037, 6.032, 6.027, 6.022, 6.017, 6.012, 6.007, 6.002, 5.997, 5.992, 5.987, 5.982, 5.977, 5.972, 5.967, 5.962, 5.957, 5.952, 5.947, 5.942, 5.937, 5.932, 5.927, 5.922, 5.917, 5.912, 5.907, 5.902, 5.897, 5.892, 5.887, 5.882, 5.877, 5.872, 5.867, 5.862, 5.857, 5.852, 5.847, 5.842, 5.837, 5.832, 5.827, 5.822, 5.817, 5.812, 5.807, 5.802, 5.797, 5.792, 5.787, 5.782, 5.777, 5.772, 5.767, 5.762, 5.757, 5.752, 5.747, 5.742, 5.737, 5.732, 5.727, 5.722, 5.717, 5.712, 5.707, 5.702, 5.697, 5.692, 5.687, 5.682, 5.677, 5.672, 5.667, 5.662, 5.657, 5.652, 5.647, 5.642, 5.637, 5.632, 5.627, 5.622, 5.617, 5.612, 5.607, 5.602, 5.597, 5.592, 5.587, 5.582, 5.577, 5.572, 5.567, 5.562, 5.557, 5.552, 5.547, 5.542, 5.537, 5.532, 5.527, 5.522, 5.517, 5.512, 5.507, 5.502, 5.497, 5.492, 5.487, 5.482, 5.477, 5.472, 5.467, 5.462, 5.457, 5.452, 5.447, 5.44

**Figure S16.**  $^1\text{H}$  NMR spectrum of  $\text{H}_2\text{TPP}(\text{NO}_2)(\text{PE})_2$  in  $\text{CDCl}_3$ .

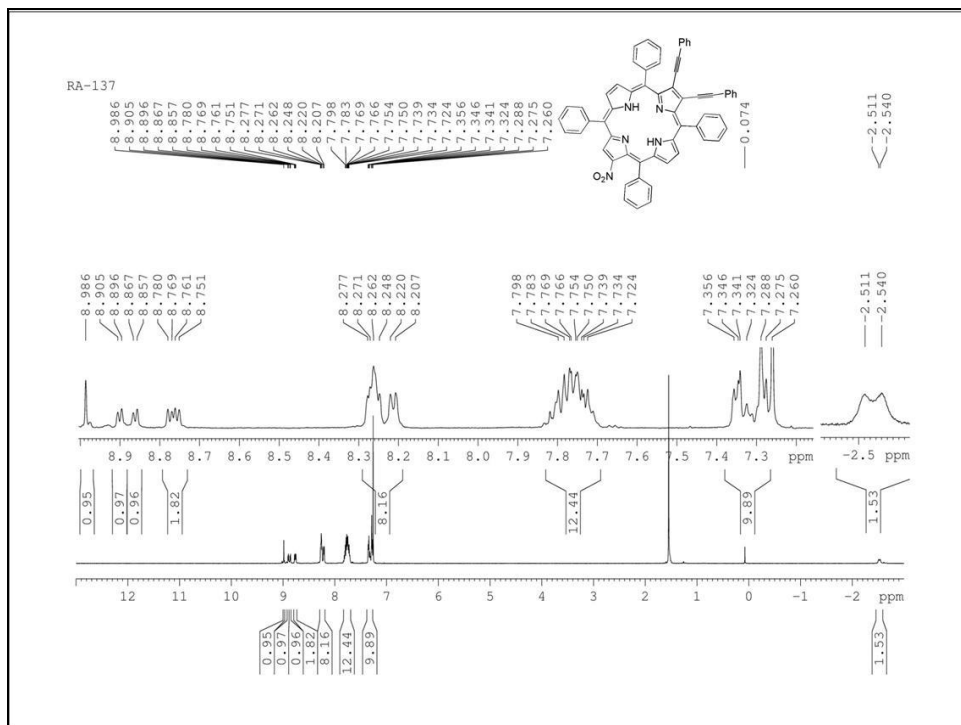

**Figure S17.**  $^1\text{H}$  NMR spectrum of  $\text{H}_2\text{TPP}(\text{NO}_2)\text{Th}_2$  in  $\text{CDCl}_3$ .

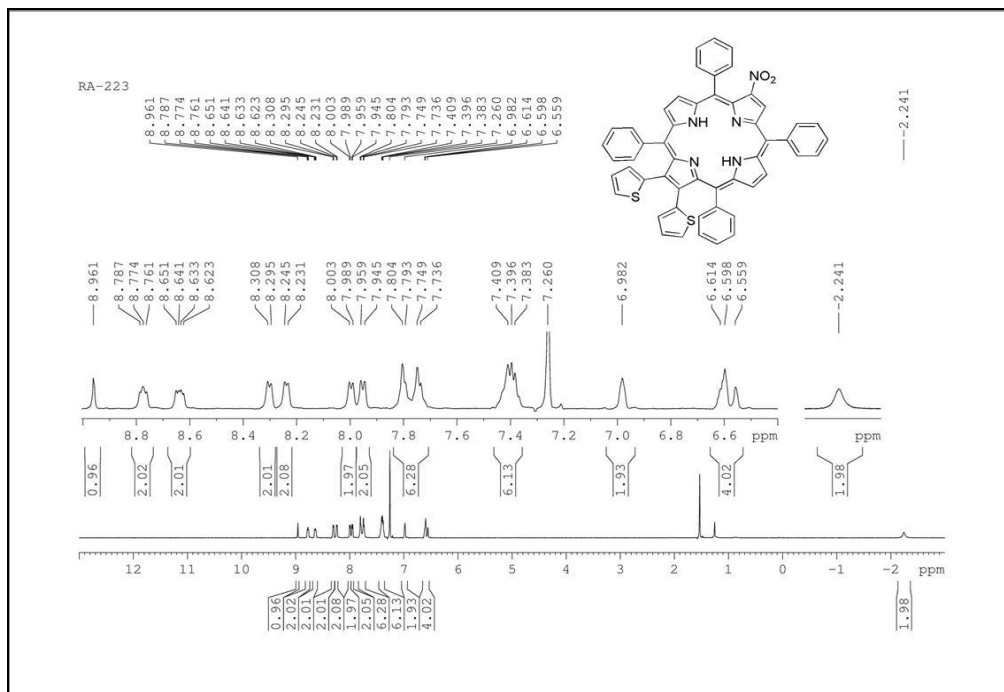

**Figure S18.**  $^1\text{H}$  NMR spectrum of  $\text{NiTPP}(\text{NO}_2)\text{Th}_2$  in  $\text{CDCl}_3$ .

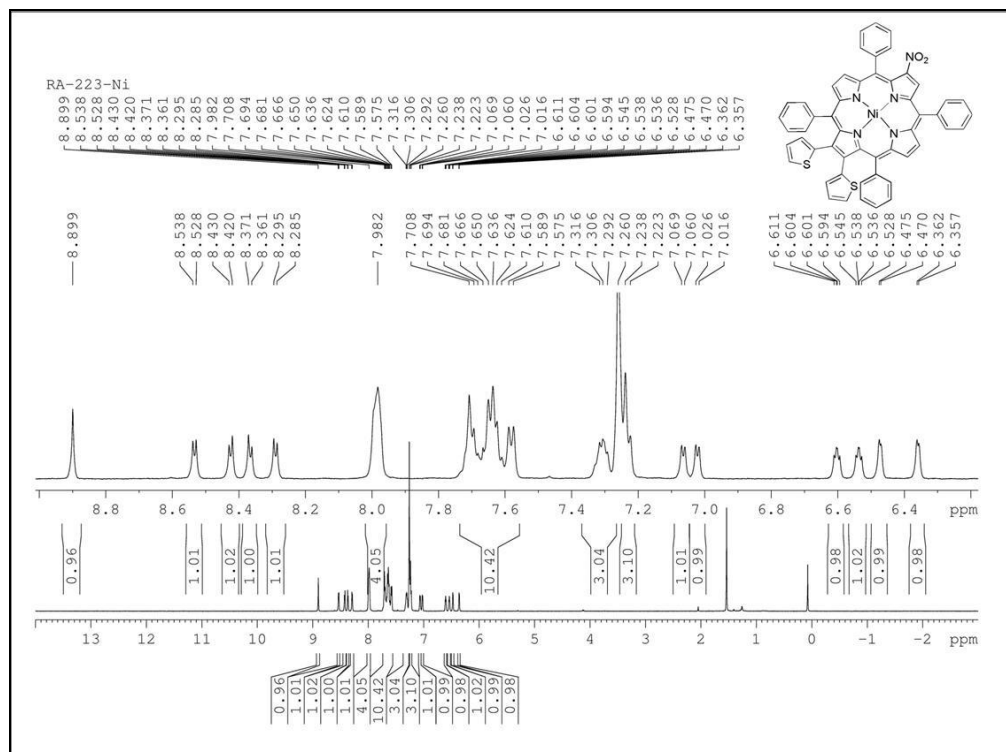

**Figure S19.**  $^1\text{H}$  NMR spectrum of  $\text{ZnTPP}(\text{NO}_2)\text{Th}_2$  in  $\text{CDCl}_3$ .

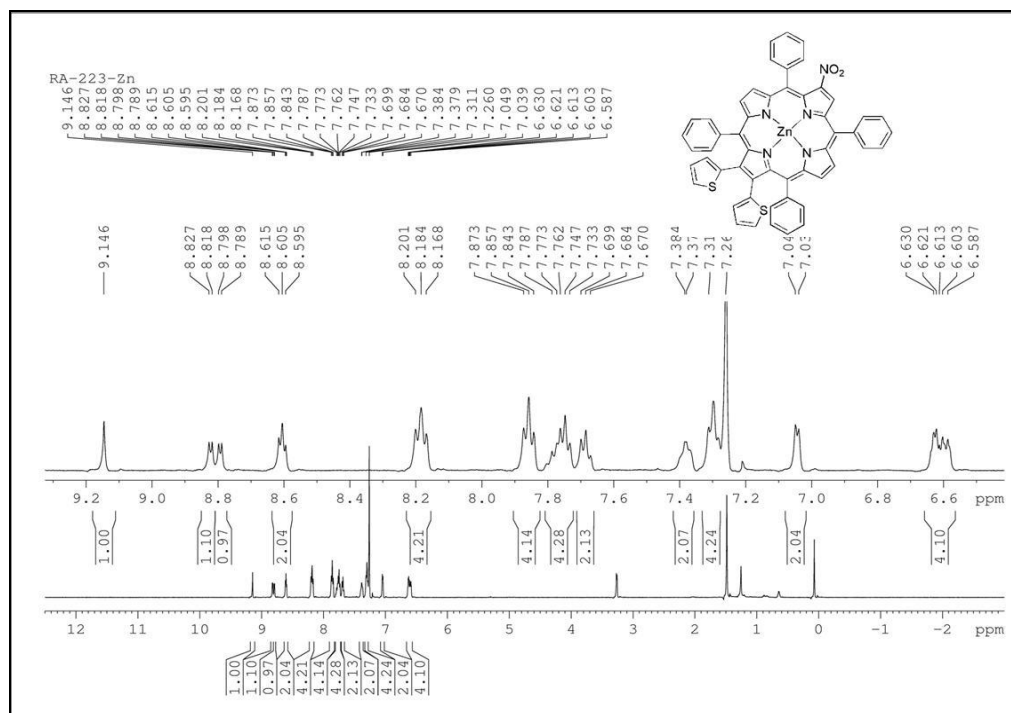

**Figure S20.**  $^1\text{H}$  NMR spectrum of  $\text{H}_2\text{TPP}(\text{NO}_2)(\text{CN})_2$  in  $\text{CDCl}_3$ .

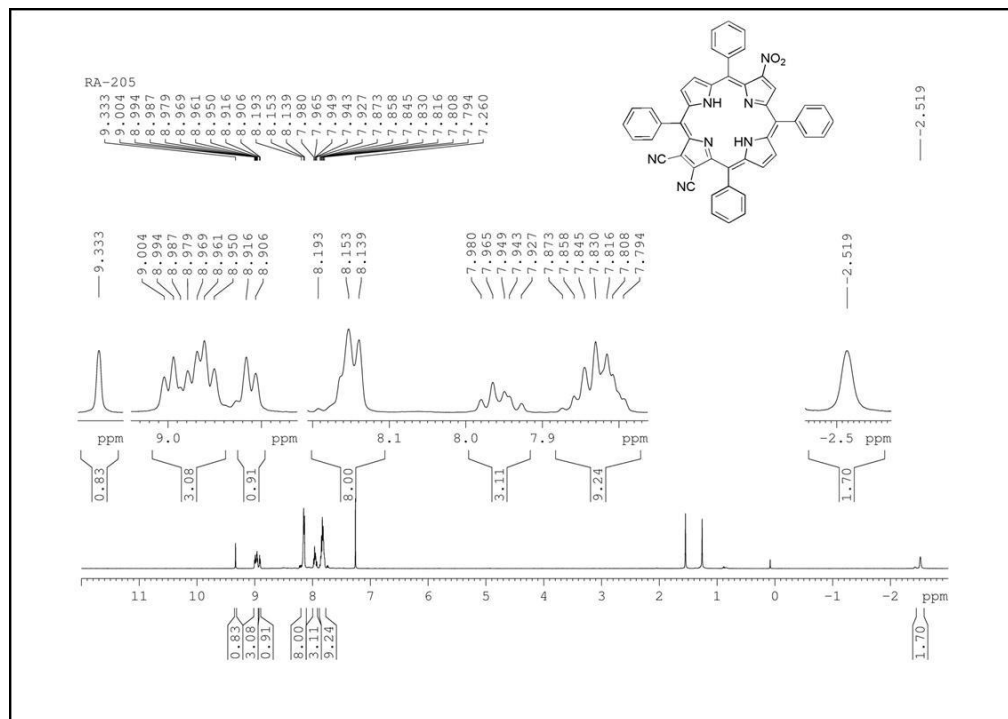

**Figure S22.**  $^1\text{H}$  NMR spectrum of  $\text{ZnTPP}(\text{NO}_2)(\text{CN})_2$  in  $\text{CDCl}_3$ .

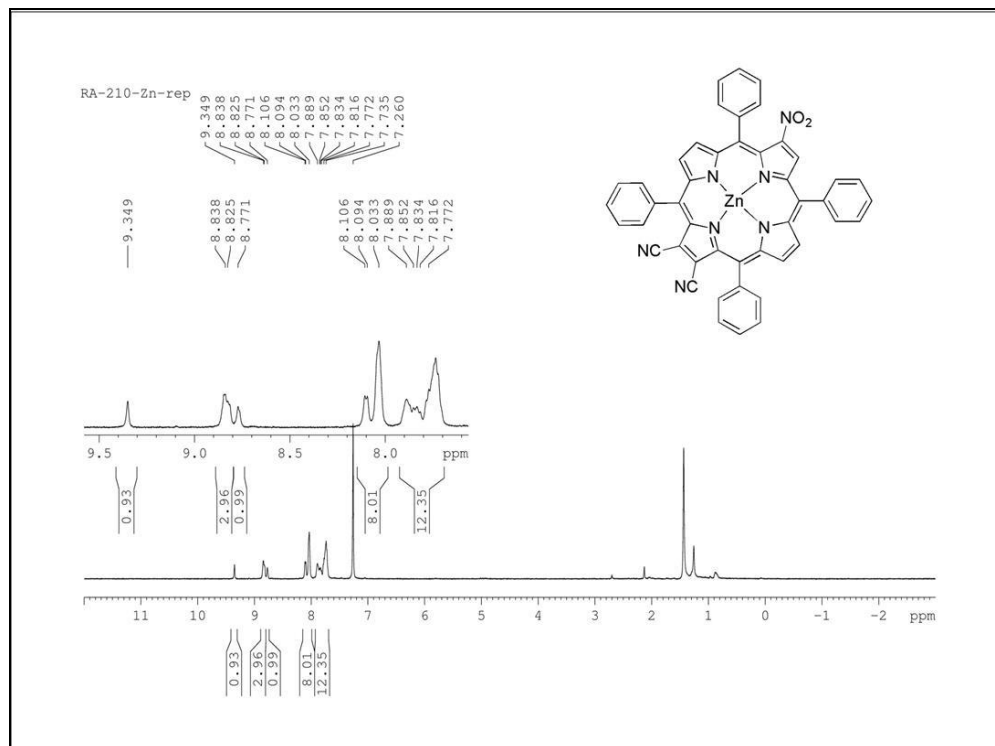

**Figure S23.**  $^1\text{H}$  NMR spectrum of  $\text{NiTPP}(\text{NO}_2)\text{Br}_6$  in  $\text{CDCl}_3$ .

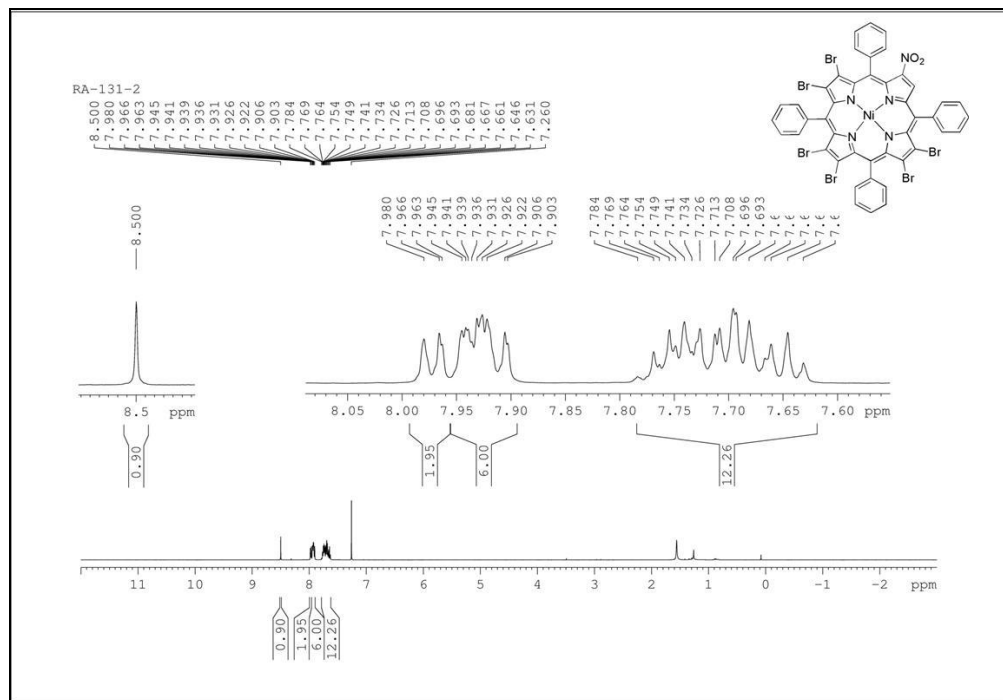



**Figure S24.**  $^1\text{H}$  NMR spectrum of  $\text{ZnTPP}(\text{NO}_2)\text{Br}_6$  in  $\text{CDCl}_3$ .

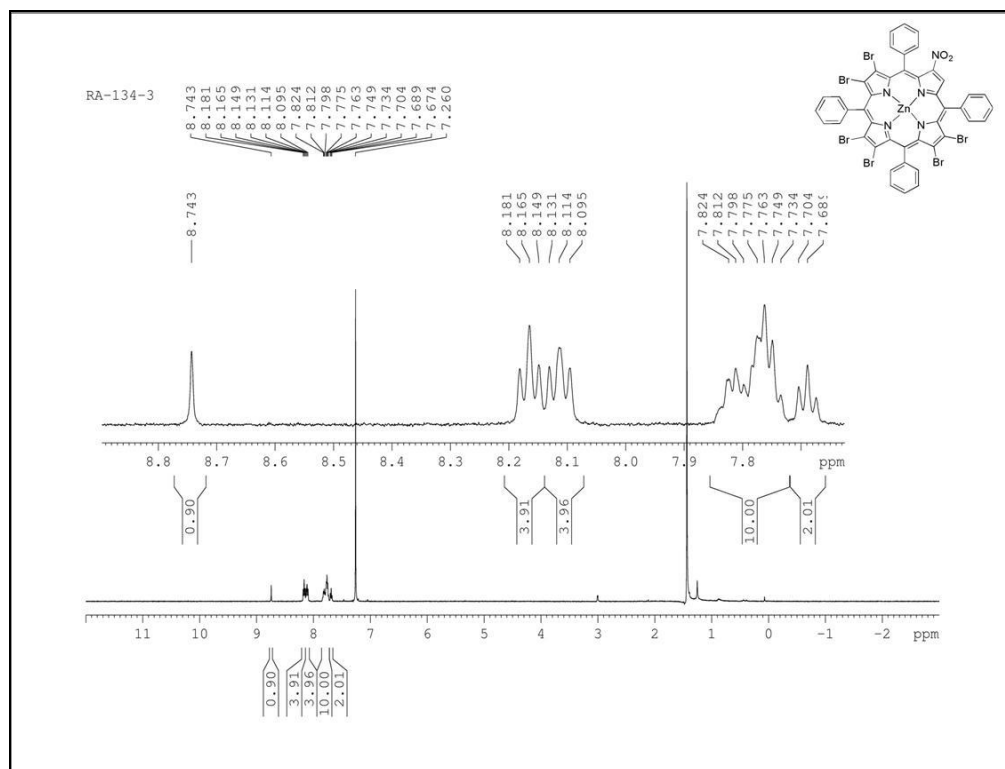

**Figure S25.**  $^1\text{H}$  NMR spectrum of  $\text{NiTPP}(\text{NO}_2)\text{Ph}_6$  in  $\text{CDCl}_3$ .

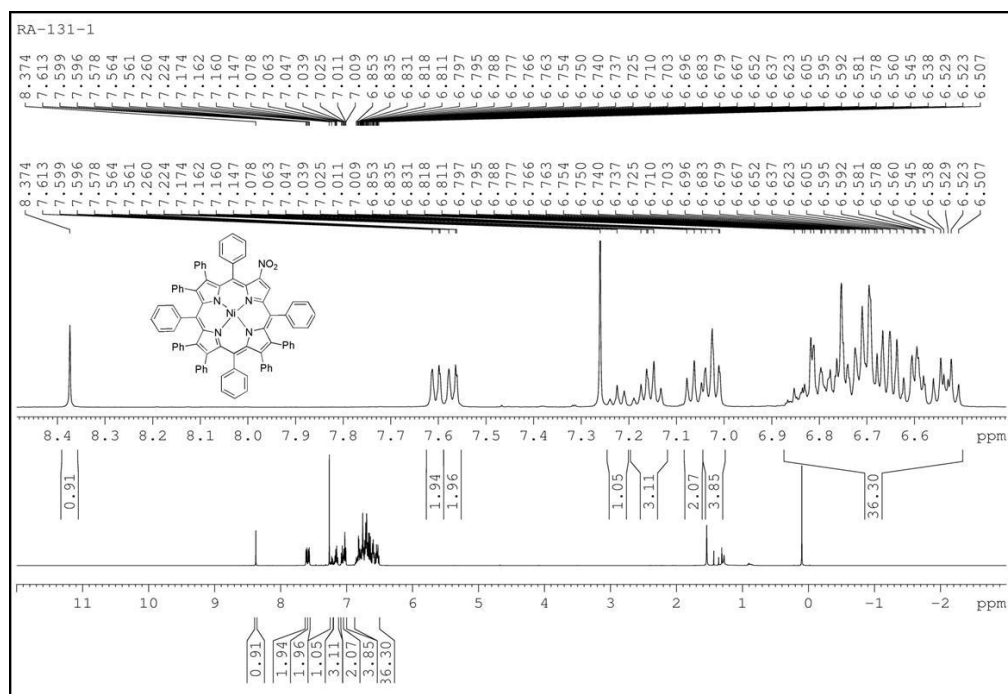

RA-133-1-1

Chemical structure of compound 133-1-1 (top right):

c1ccc(cc1)c2nc3c(nc4c2c5ccccc5n4)c6ccccc6n3c7c2c8ccccc8n7

<sup>1</sup>H NMR spectrum (CDCl<sub>3</sub>) showing chemical shifts (ppm) and integration values:

Chemical shifts (ppm): 8.568, 7.436, 7.434, 7.428, 7.414, 7.310, 7.295, 7.280, 7.260, 7.236, 7.220, 7.205, 7.176, 7.160, 7.146, 6.858, 6.855, 6.844, 6.840, 6.830, 6.820, 6.802, 6.771, 6.768, 6.757, 6.753, 6.741, 6.729, 6.706, 6.692, 6.689, 6.678, 6.664, 6.657, 6.648, 6.631, 6.620, 6.617, 6.606, 6.602, 6.593, 6.589, 6.585.

Integration values (bottom): 0.88, 1.90, 1.92, 3.89, 1.09, 3.07, 2.05, 5.15, 31.33.

**Chemical structure of 1a:** O=[N+]([O-])c1c2c(c3c1c(c4c3c5c(c2n4)C#CC6=CC=CC=C6)C#CC7=CC=CC=C7)C#CC8=CC=CC=C8)C#CC9=CC=CC=C9)C#CC10=CC=CC=C10)n3

**<sup>1</sup>H NMR spectrum (CDCl<sub>3</sub>):**

- Chemical shift (ppm):** 8.399, 8.392, 8.384, 8.292, 8.278, 8.206, 7.796, 7.790, 7.782, 7.774, 7.758, 7.751, 7.743, 7.739, 7.732, 7.689, 7.681, 7.674, 7.667, 7.659, 7.651, 7.344, 7.331, 7.328, 7.306, 7.301, 7.293, 7.290, 7.277, 7.268, 7.260, 7.249, 7.234, 7.231, 7.218, 7.202.
- Integration values:** 0.96, 2.01, 3.75, 1.99, 10.11, 2.16, 20.00, 10.98, 1.15.
- Peak assignments:** 8.599, 8.444, 8.431, 8.399, 8.392, 8.384, 8.292, 8.278, 7.806, 7.796, 7.790, 7.782, 7.774, 7.758, 7.751, 7.743, 7.739, 7.732, 7.689, 7.681, 7.674, 7.667, 7.659, 7.651, 7.344, 7.331, 7.328, 7.306, 7.301, 7.293, 7.290, 7.277, 7.268, 7.260, 7.249, 7.234, 7.231, 7.218, 7.202.

Figure S28.  $^1\text{H}$  NMR spectrum of  $\text{NiTPP}(\text{NO}_2)(\text{PE})_6$  in  $\text{CDCl}_3$

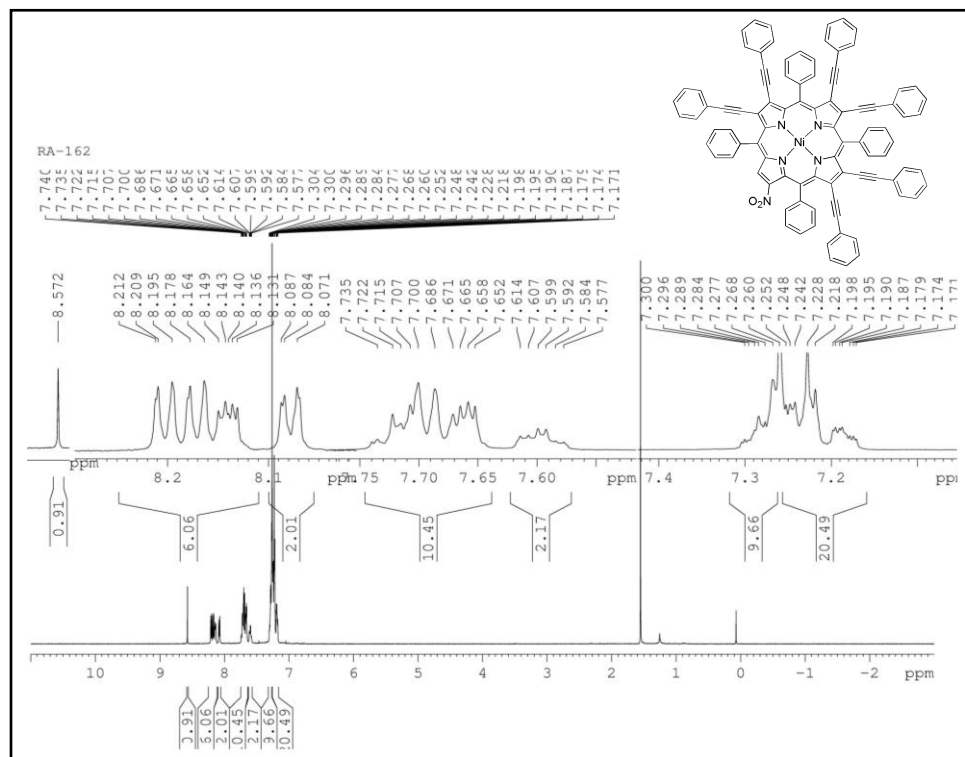

Figure S29.  $^1\text{H}$  NMR spectrum of  $\text{ZnTPP}(\text{NO}_2)(\text{PE})_6$  in  $\text{CDCl}_3$

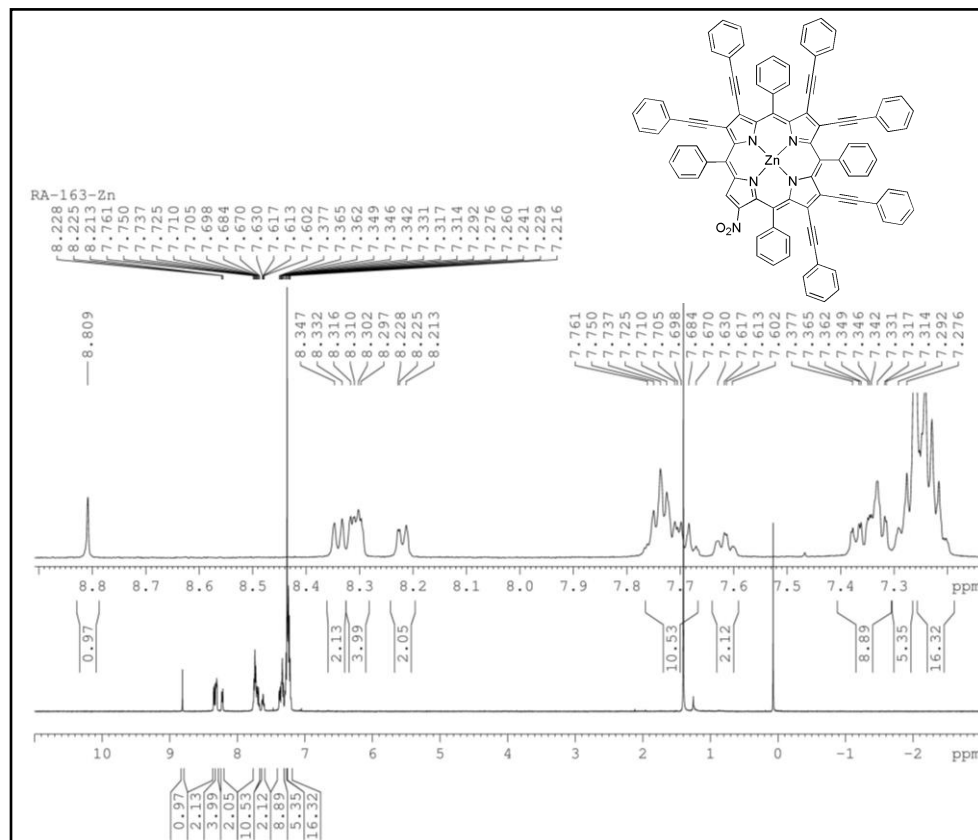

**Figure S30.** UV-Visible spectral changes during titration of **2-9** while increasing [TFA], insets show the corresponding Hill plots.

**(a).**  $\text{H}_2\text{TPP}(\text{NO}_2)(\text{PE})_6$  (**2**)

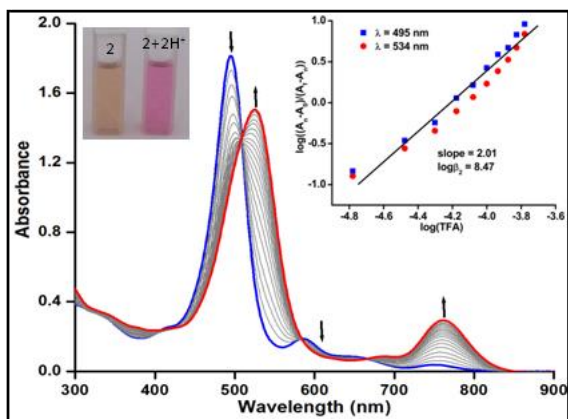

**(b).**  $\text{H}_2\text{TPP}(\text{NO}_2)\text{Th}_6$  (**3**)

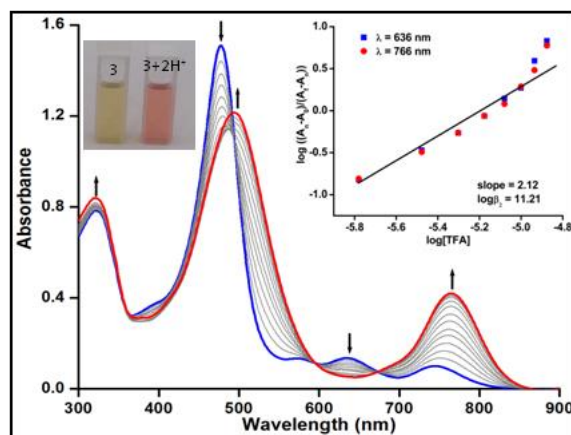

**(c).**  $\text{H}_2\text{TPP}(\text{NO}_2)\text{Ph}_6$  (**4**)

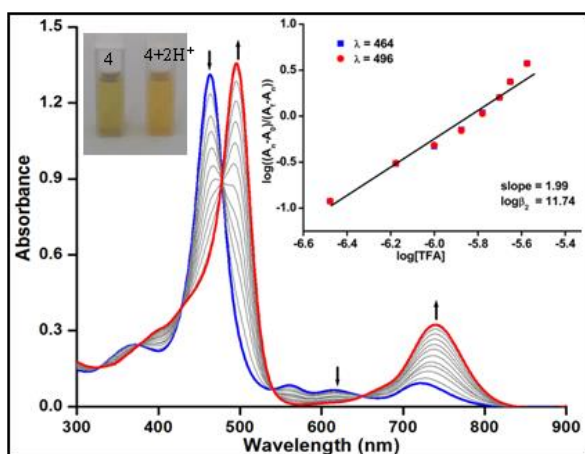

**(d).**  $\text{H}_2\text{TPP}(\text{NO}_2)\text{Br}_2$  (**5**)

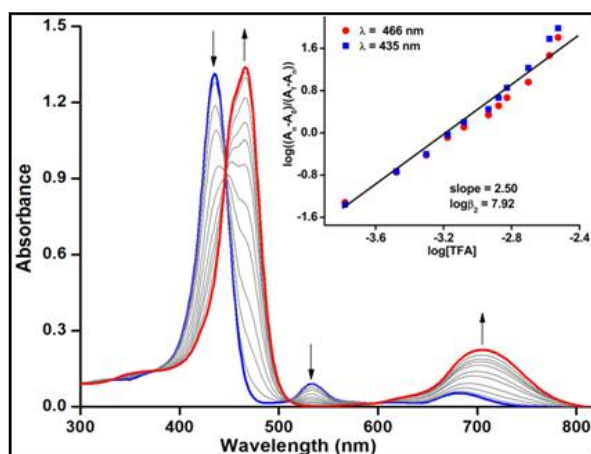

**(e).**  $\text{H}_2\text{TPP}(\text{NO}_2)(\text{PE})_2$  (**6**)

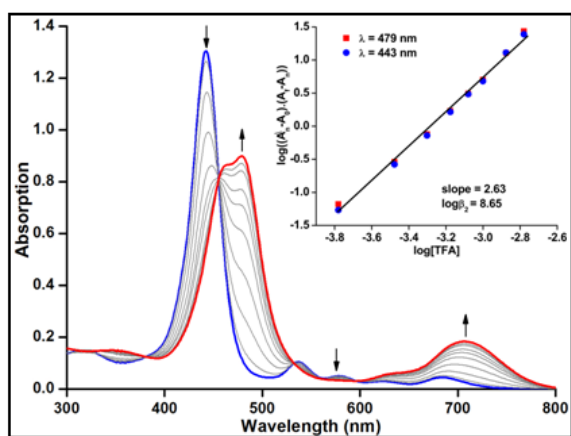

**(f).**  $\text{H}_2\text{TPP}(\text{NO}_2)\text{Ph}_2$  (**7**)

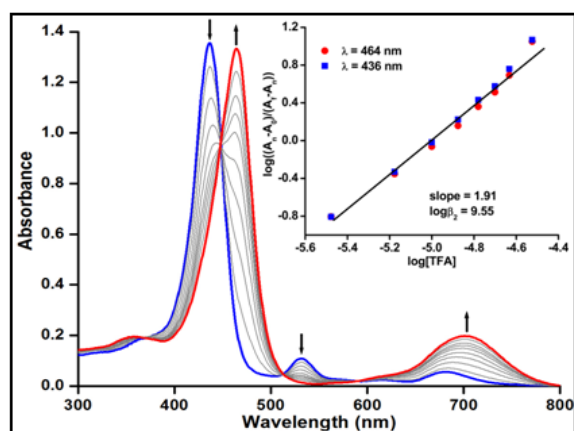

(g).  $\text{H}_2\text{TPP}(\text{NO}_2)\text{Th}_2$  (8)

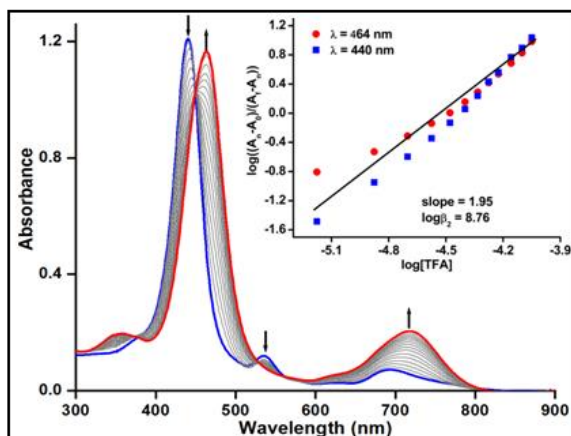

(h).  $\text{H}_2\text{TPP}(\text{NO}_2)\text{CN}_2$  (9)

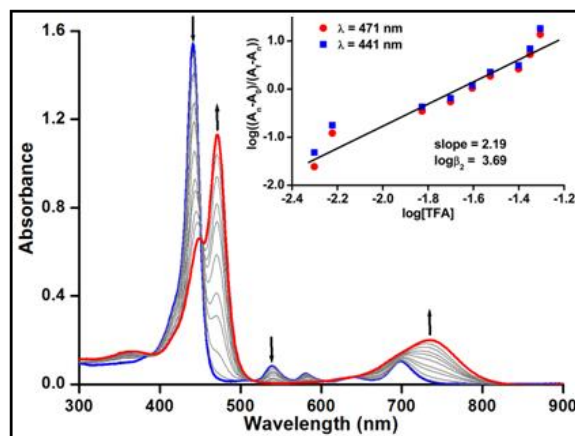

**Figure S31.** UV-Visible spectral changes during titration of TBAOH, insets show Hill plots.

(a).  $\text{H}_2\text{TPP}(\text{NO}_2)(\text{PE})_6$  (2)

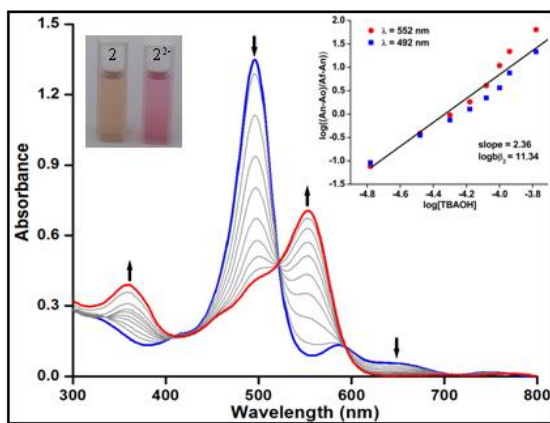

(b).  $\text{H}_2\text{TPP}(\text{NO}_2)\text{Th}_6$  (3)

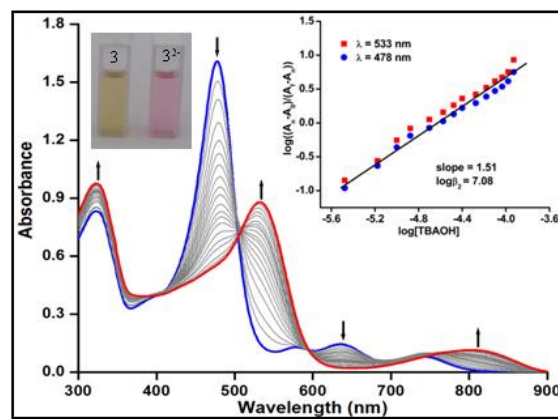

(c).  $\text{H}_2\text{TPP}(\text{NO}_2)\text{Ph}_6$  (4)

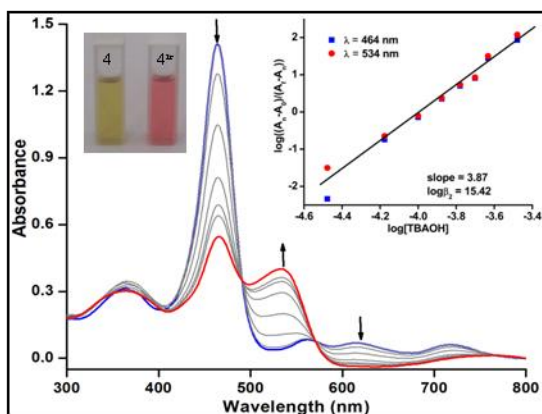

**Table S7.** Electrochemical redox data of various metal complexes of mixed substituted porphyrins in CH<sub>2</sub>Cl<sub>2</sub> containing 0.1 M TBAPF<sub>6</sub> with a scan rate of 0.1 V/s at 298 K.

| Porphyrin                                | Oxidation (mV)    |      | Reduction (mV) |       |     | Metal Centred |       | $\Delta E$ (mV) |
|------------------------------------------|-------------------|------|----------------|-------|-----|---------------|-------|-----------------|
|                                          | I                 | II   | I              | II    | III | Oxdn.         | Redn. |                 |
| CoTPP                                    | 1060              | 1315 | -1380          |       |     | 850           | -860  | 2440            |
| CoTPP(NO <sub>2</sub> )                  | 1175              | 1421 | -1298          |       |     | 910           | -661  | 2473            |
| CoTPP(NO <sub>2</sub> )Br <sub>2</sub>   | 1223              | 1442 | -1208          |       |     | 922           | -515  | 2431            |
| CoTPP(NO <sub>2</sub> )Ph <sub>2</sub>   | 1134              | 1348 | -1292          |       |     | 886           | -644  | 2426            |
| CoTPP(NO <sub>2</sub> )(PE) <sub>2</sub> | 1212              | 1414 | -1187          |       |     | 957           | -545  | 2399            |
| CoTPP(NO <sub>2</sub> )Th <sub>2</sub>   | 1117              | 1317 | -1260          |       |     | 881           | -585  | 2377            |
| CoTPP(NO <sub>2</sub> )(CN) <sub>2</sub> | 1267              | 1391 | -1147          |       |     | 965           | -380  | 2414            |
| CoTPP(NO <sub>2</sub> )Br <sub>6</sub>   | 1377              | 1513 | -1103          |       |     | 1012          | -269  | 2480            |
| CoTPP(NO <sub>2</sub> )Ph <sub>6</sub>   | 1082              | 1192 | -1382          |       |     | 801           | -638  | 2463            |
| CoTPP(NO <sub>2</sub> )(PE) <sub>6</sub> | 1273              | 1397 | -1073          |       |     | 1009          | -337  | 2346            |
| CoTPP(NO <sub>2</sub> )Th <sub>6</sub>   | 1158              | -    | -1253          |       |     | 884           | -472  | 2411            |
| NiTPP                                    | 1020              | 1315 | -1280          | -1720 |     |               |       | 2300            |
| NiTPP(NO <sub>2</sub> )                  | 1187              | 1316 | -948           | -1212 |     |               |       | 2136            |
| NiTPP(NO <sub>2</sub> )Br <sub>2</sub>   | 1242 <sup>a</sup> | -    | -829           | -1061 |     |               |       | 2071            |
| NiTPP(NO <sub>2</sub> )Ph <sub>2</sub>   | 1116              | 1241 | -939           | -1200 |     |               |       | 2055            |
| NiTPP(NO <sub>2</sub> )(PE) <sub>2</sub> | 1193              | 1306 | -818           | -1032 |     |               |       | 2011            |
| NiTPP(NO <sub>2</sub> )Th <sub>2</sub>   | 1119              | 1238 | -908           | -1137 |     |               |       | 2027            |
| NiTPP(NO <sub>2</sub> )(CN) <sub>2</sub> | 1296 <sup>a</sup> | -    | -734           | -966  |     |               |       | 2030            |
| NiTPP(NO <sub>2</sub> )Br <sub>6</sub>   | 1305 <sup>a</sup> | -    | -703           | -950  |     |               |       | 2008            |
| NiTPP(NO <sub>2</sub> )Ph <sub>6</sub>   | 956               | 1183 | -988           | -1275 |     |               |       | 1944            |
| NiTPP(NO <sub>2</sub> )(PE) <sub>6</sub> | 1244 <sup>a</sup> | -    | -732           | -943  |     |               |       | 1976            |
| NiTPP(NO <sub>2</sub> )Th <sub>6</sub>   | 1018              | 1266 | -902           | -1165 |     |               |       | 1920            |
| CuTPP                                    | 970               | 1350 | -1325          | -1705 |     |               |       | 2295            |
| CuTPP(NO <sub>2</sub> )                  | 1076              | 1442 | -979           | -1229 |     |               |       | 2055            |
| CuTPP(NO <sub>2</sub> )Br <sub>2</sub>   | 1072              | 1491 | -856           | -1074 |     |               |       | 1928            |
| CuTPP(NO <sub>2</sub> )Ph <sub>2</sub>   | 962               | 1320 | -967           | -1214 |     |               |       | 1929            |
| CuTPP(NO <sub>2</sub> )(PE) <sub>2</sub> | 1061              | 1456 | -847           | -1055 |     |               |       | 1908            |

|                                          |      |      |                    |                    |       |      |
|------------------------------------------|------|------|--------------------|--------------------|-------|------|
| CuTPP(NO <sub>2</sub> )Th <sub>2</sub>   | 956  | 1402 | -911               | -1140              |       | 1867 |
| CuTPP(NO <sub>2</sub> )(CN) <sub>2</sub> | 1331 | 1599 | -626               | -1049              |       | 1957 |
| CuTPP(NO <sub>2</sub> )Br <sub>6</sub>   | 1066 | 1609 | -693               | -922               |       | 1753 |
| CuTPP(NO <sub>2</sub> )Ph <sub>6</sub>   | 698  | 1213 | -985               | -1288              |       | 1683 |
| CuTPP(NO <sub>2</sub> )(PE) <sub>6</sub> | 1013 | 1498 | -749               | -944               | -1421 | 1762 |
| CuTPP(NO <sub>2</sub> )Th <sub>6</sub>   | 780  | 1305 | -864               | -1163              |       | 1644 |
| ZnTPP                                    | 835  | 1140 | -1360              | -1765              |       | 2195 |
| ZnTPP(NO <sub>2</sub> )                  | 913  | 1217 | -1048 <sup>i</sup> | -1192              | -1500 | 1961 |
| ZnTPP(NO <sub>2</sub> )Br <sub>2</sub>   | 948  | 1182 | -939 <sup>i</sup>  | -1080              |       | 1887 |
| ZnTPP(NO <sub>2</sub> )Ph <sub>2</sub>   | 850  | 1074 | -1064 <sup>i</sup> | -1204              | -1498 | 1914 |
| ZnTPP(NO <sub>2</sub> )(PE) <sub>2</sub> | 933  | 1181 | -953 <sup>i</sup>  | -1085              |       | 1886 |
| ZnTPP(NO <sub>2</sub> )Th <sub>2</sub>   | 875  | 1106 | -993 <sup>i</sup>  | -1126              | -1376 | 1868 |
| ZnTPP(NO <sub>2</sub> )(CN) <sub>2</sub> | 1069 | 1429 | -698               | -1089              |       | 1767 |
| ZnTPP(NO <sub>2</sub> )Br <sub>6</sub>   | 931  | 1192 | -839 <sup>i</sup>  | -977               | -1227 | 1770 |
| ZnTPP(NO <sub>2</sub> )Ph <sub>6</sub>   | 686  | 853  | -1076 <sup>i</sup> | -1377 <sup>i</sup> |       | 1762 |
| ZnTPP(NO <sub>2</sub> )(PE) <sub>6</sub> | 925  | 1176 | -858 <sup>i</sup>  | -976               |       | 1783 |
| ZnTPP(NO <sub>2</sub> )Th <sub>6</sub>   | 754  | 985  | -931 <sup>i</sup>  | -1106              | -1496 | 1685 |

<sup>a</sup>refers two electron oxidation and <sup>i</sup>refers to irreversible

**Figure S32.** UV-Visible spectral changes of Co(II) porphyrins upon addition of *tert*-butyl hydroperoxide (conversion of Co(II) to Co(III) porphyrins) in CH<sub>2</sub>Cl<sub>2</sub> at 298 K.

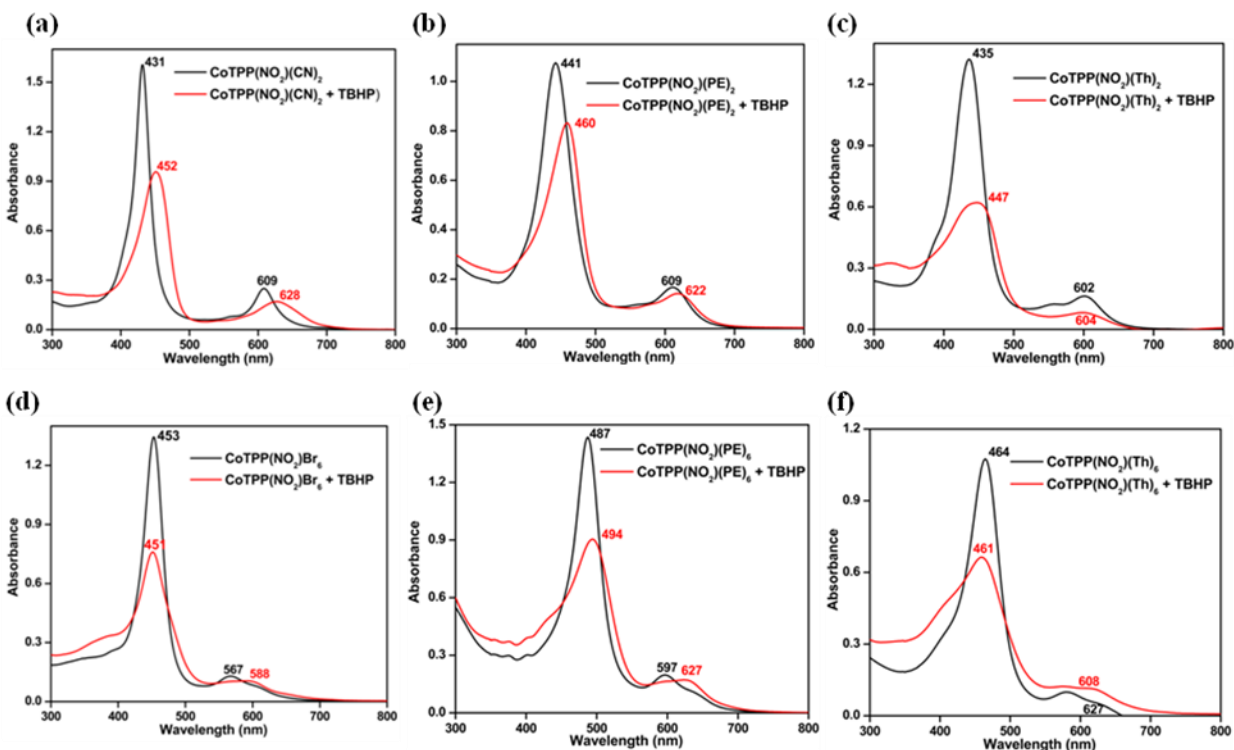

**Table S8.** UV-Visible spectral data of Co(II) and Co(III) porphyrins in CH<sub>2</sub>Cl<sub>2</sub> at 298 K.

| Porphyrin                                | Without TBHP (Co <sup>II</sup> ) |               | With TBHP (Co <sup>III</sup> ) |               |
|------------------------------------------|----------------------------------|---------------|--------------------------------|---------------|
|                                          | B band, nm                       | Q band(s), nm | B band, nm                     | Q band(s), nm |
| CoTPP(NO <sub>2</sub> )                  | 420                              | 540, 578      | 442                            | 557           |
| CoTPP(NO <sub>2</sub> )Br <sub>2</sub>   | 431                              | 551, 595      | 450                            | 597           |
| CoTPP(NO <sub>2</sub> )Ph <sub>2</sub>   | 434                              | 553, 593      | 430                            | 588           |
| CoTPP(NO <sub>2</sub> )(PE) <sub>2</sub> | 441                              | 609           | 460                            | 620           |
| CoTPP(NO <sub>2</sub> )Th <sub>2</sub>   | 435                              | 602           | 447                            | 604           |
| CoTPP(NO <sub>2</sub> )(CN) <sub>2</sub> | 431                              | 609           | 452                            | 628           |
| CoTPP(NO <sub>2</sub> )Br <sub>6</sub>   | 453                              | 567           | 451                            | 588           |
| CoTPP(NO <sub>2</sub> )Ph <sub>6</sub>   | 454                              | 570, 611      | 446                            | 604           |
| CoTPP(NO <sub>2</sub> )(PE) <sub>6</sub> | 487                              | 597           | 494                            | 627           |
| CoTPP(NO <sub>2</sub> )Th <sub>6</sub>   | 464                              | 580, 627      | 461                            | 608           |



**Figure S33.** Cyclic voltammograms of (a)  $\text{H}_2\text{TPP}(\text{NO}_2)\text{X}_2$ , (b)  $\text{NiTPP}(\text{NO}_2)\text{X}_2$ , (c)  $\text{ZnTPP}(\text{NO}_2)\text{X}_2$ , (d)  $\text{CoTPP}(\text{NO}_2)\text{X}_2$  (where  $\text{X} = \text{H}, \text{Br}, \text{CN}, \text{PE}, \text{Th}$  and  $\text{Ph}$ ) complexes in  $\text{CH}_2\text{Cl}_2^{\text{a}}$ .

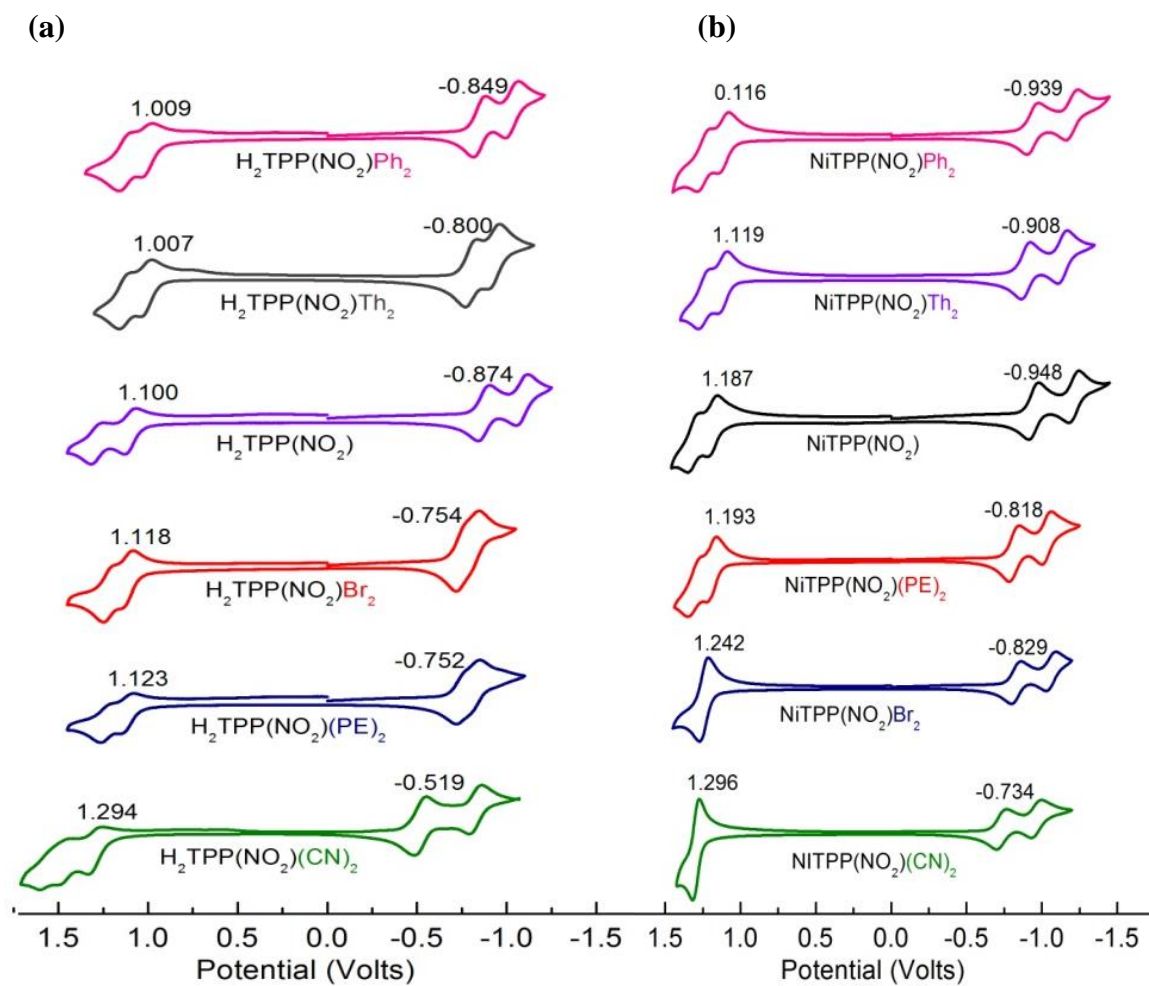

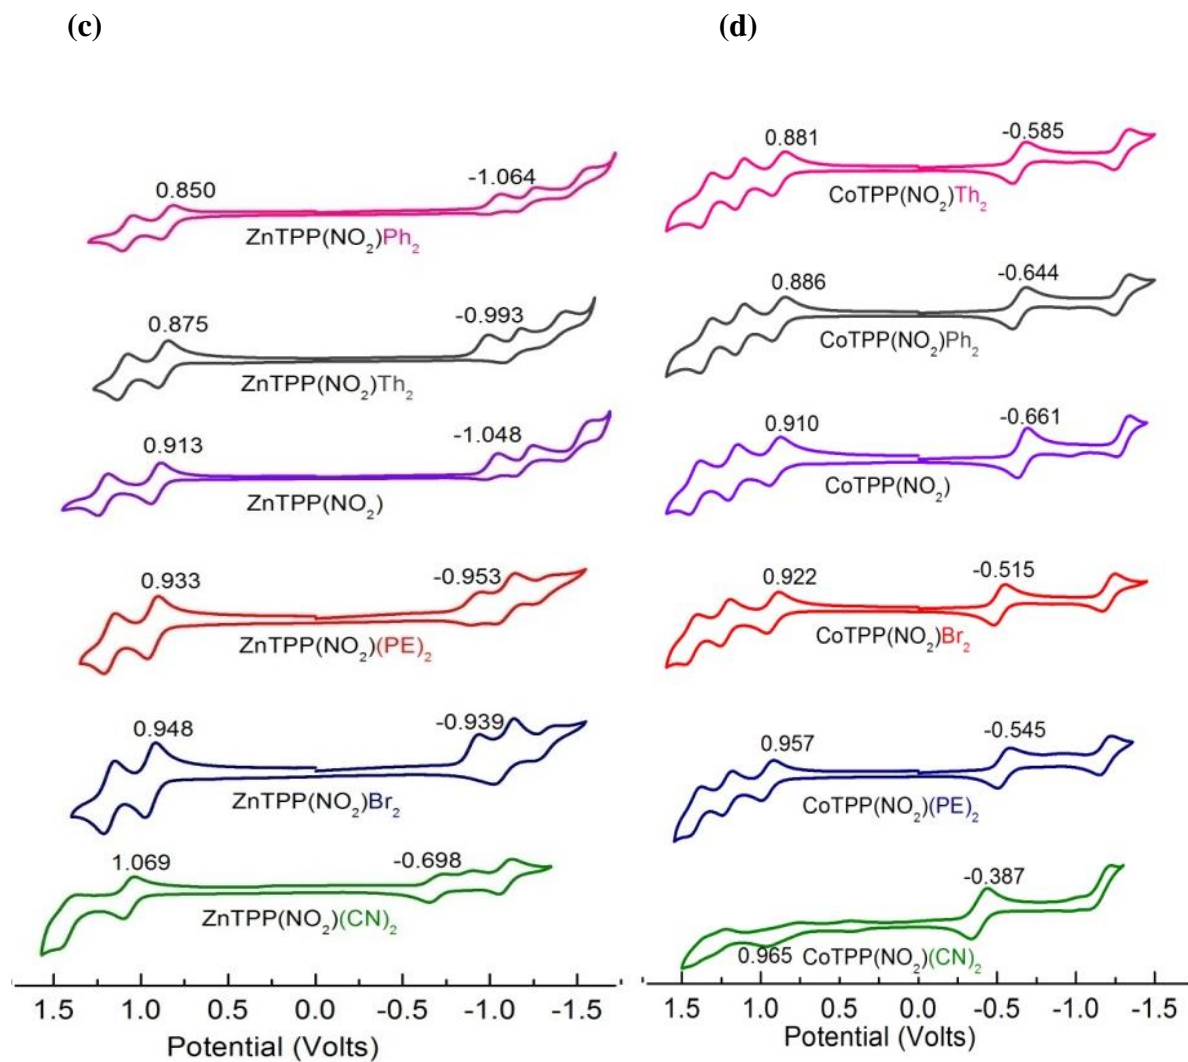

<sup>a</sup>Containing 0.1M TBAPF<sub>6</sub> with a scan rate of 0.1 V/s. Pt Working electrode, Ag/AgCl Reference electrode and Pt wire counter electrode were used.

**Figure S34.** Cyclic voltammograms of (a)  $\text{H}_2\text{TPP}(\text{NO}_2)\text{X}_6$ , (b)  $\text{NiTPP}(\text{NO}_2)\text{X}_6$ , (c)  $\text{ZnTPP}(\text{NO}_2)\text{X}_6$ , (d)  $\text{CoTPP}(\text{NO}_2)\text{X}_6$  (where  $\text{X} = \text{H}, \text{Br}, \text{PE}, \text{Th}$  and  $\text{Ph}$ ) complexes in  $\text{CH}_2\text{Cl}_2$ .

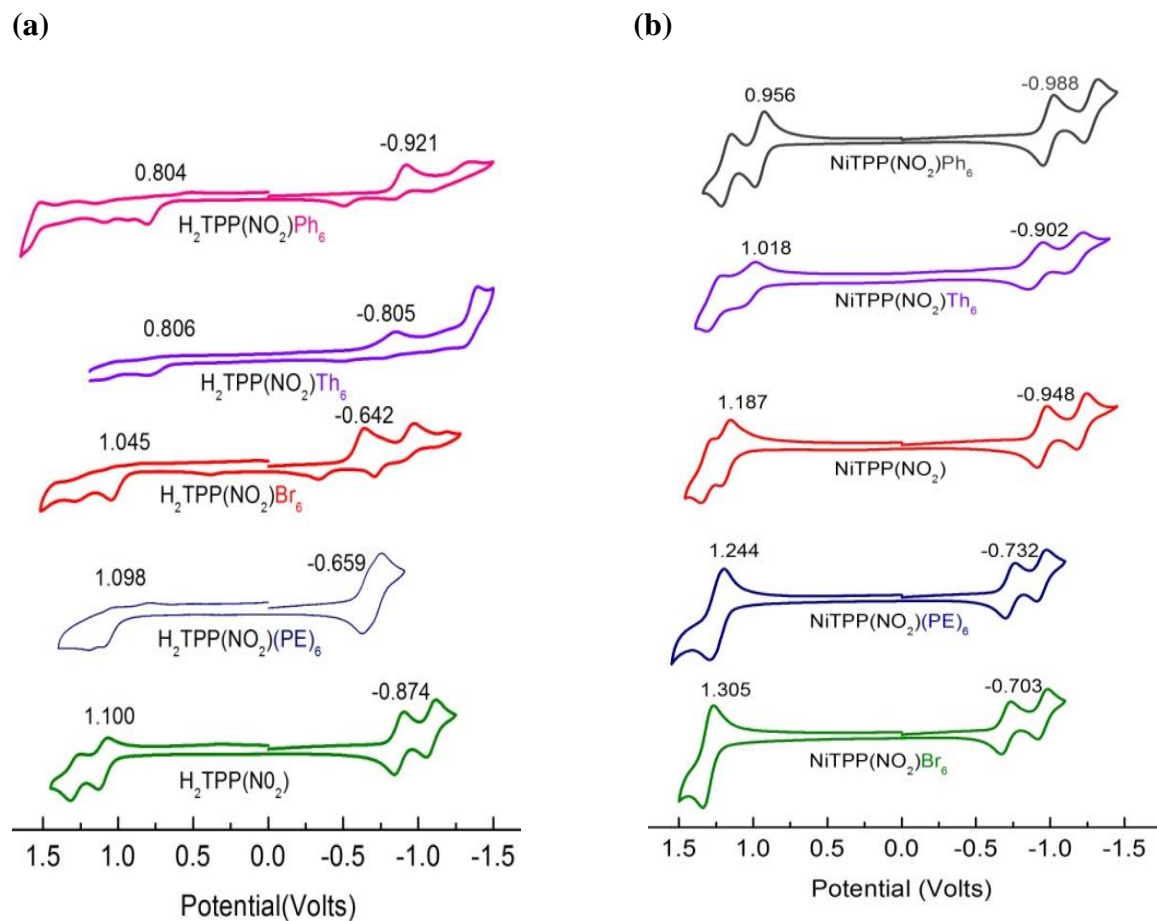

(c)

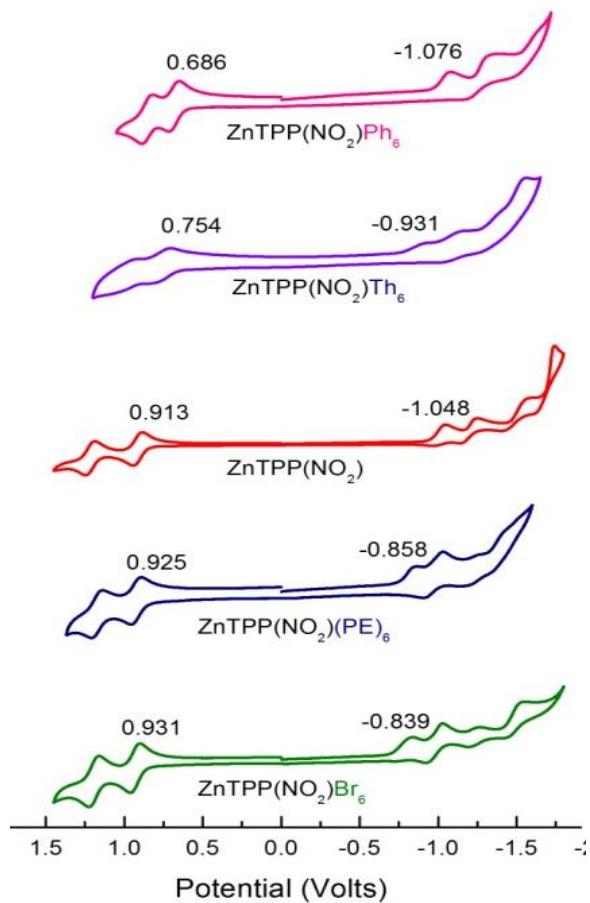

(d)

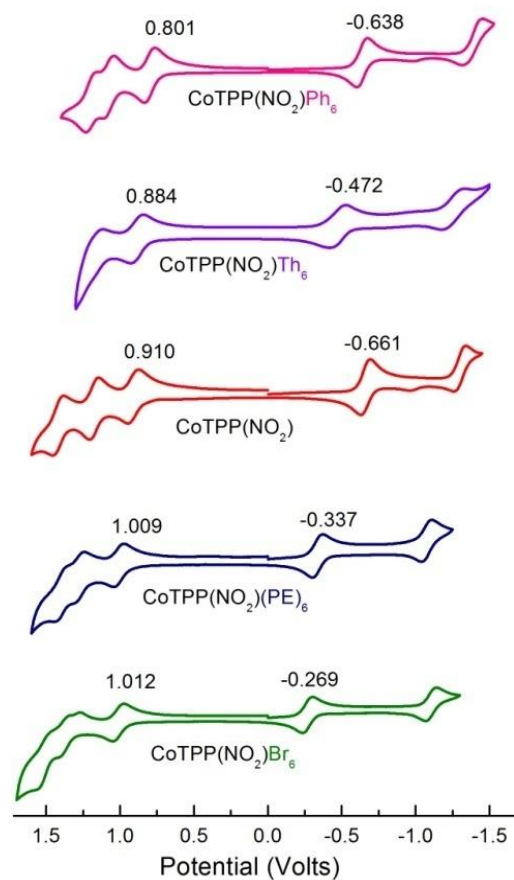

<sup>a</sup>Containing 0.1M TBAPF<sub>6</sub> with a scan rate of 0.1 V/s. Pt Working electrode, Ag/AgCl Reference electrode and Pt wire counter electrode were used.

**Figure S35.** Cyclic voltammograms of (a)  $\text{MTPP}(\text{NO}_2)(\text{PE})_2$ , (b)  $\text{MTPP}(\text{NO}_2)(\text{PE})_6$  where  $\text{M} = 2\text{H}, \text{Cu(II)}, \text{Zn(II)}, \text{Ni(II)}, \text{and Co(II)}$  in  $\text{CH}_2\text{Cl}_2^{\text{a}}$ .

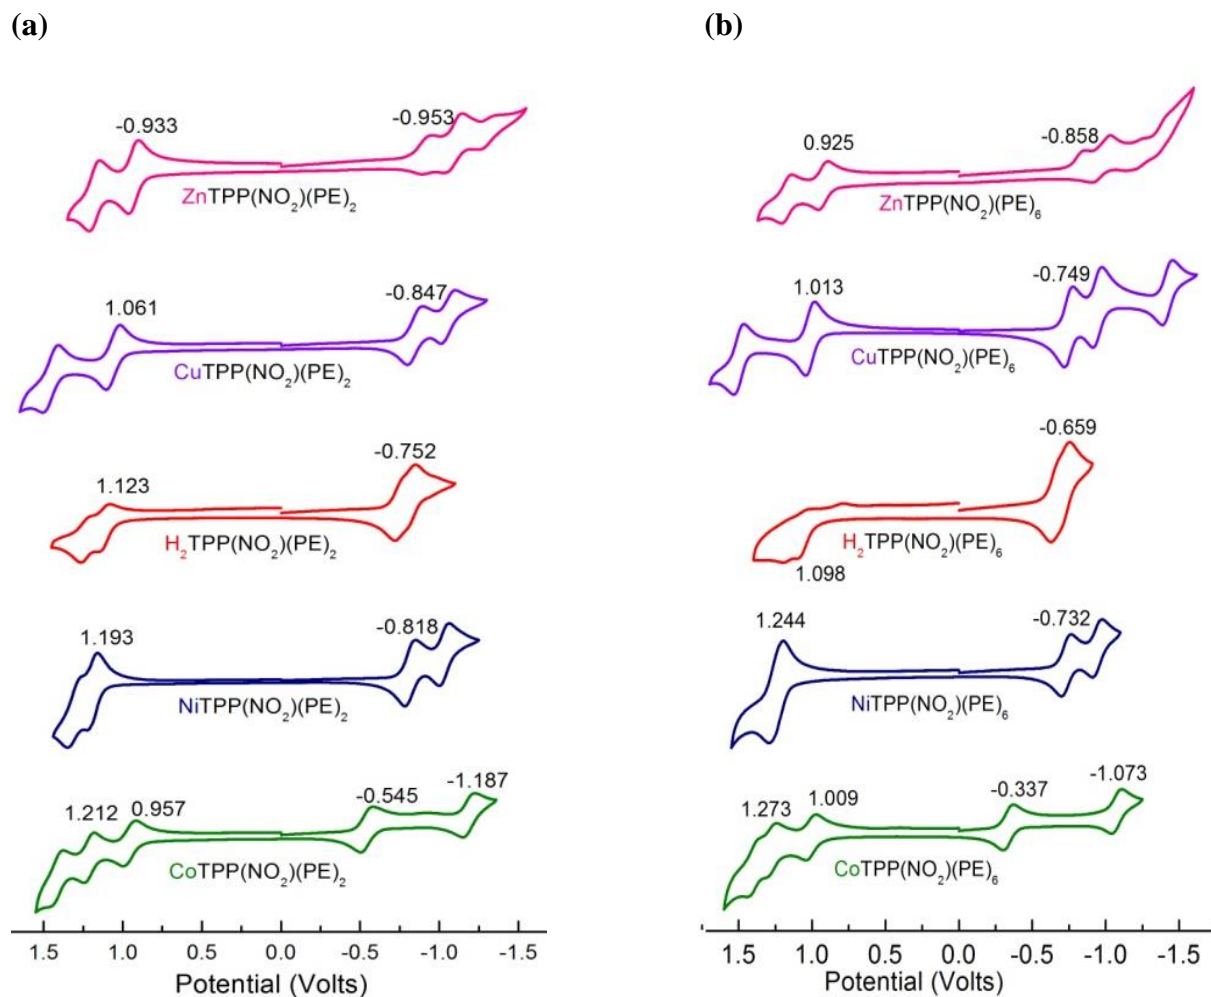

<sup>a</sup>Containing 0.1M TBAPF<sub>6</sub> with a scan rate of 0.1 V/s. Pt Working electrode, Ag/AgCl Reference electrode and Pt wire counter electrode were used.

**Figure S36.** Cyclic voltammograms of (a) MTPP(NO<sub>2</sub>)Th<sub>2</sub>, (b) MTPP(NO<sub>2</sub>)Th<sub>6</sub> where M = 2H, Cu(II), Zn(II), Ni(II), and Co(II) in CH<sub>2</sub>Cl<sub>2</sub><sup>a</sup>.

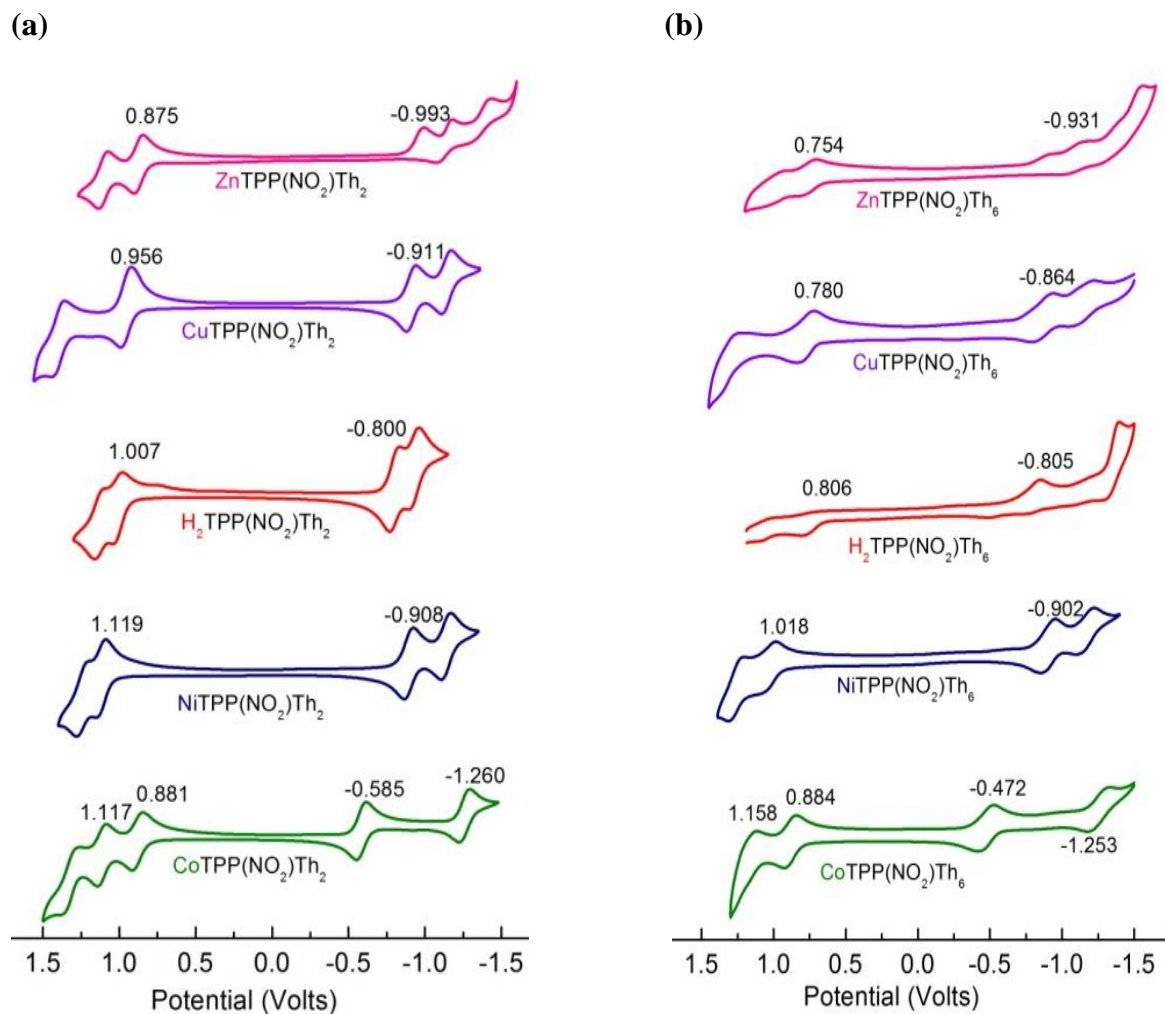

<sup>a</sup>Containing 0.1M TBAPF<sub>6</sub> with a scan rate of 0.1 V/s. Pt Working electrode, Ag/AgCl Reference electrode and Pt wire counter electrode were used.

**Figure S37.** The HOMO-LUMO variation of CuTPP(NO<sub>2</sub>)X<sub>2</sub> where X = PE, Br, Ph and Th in comparison to CuTPP(NO<sub>2</sub>) and CuTPP.

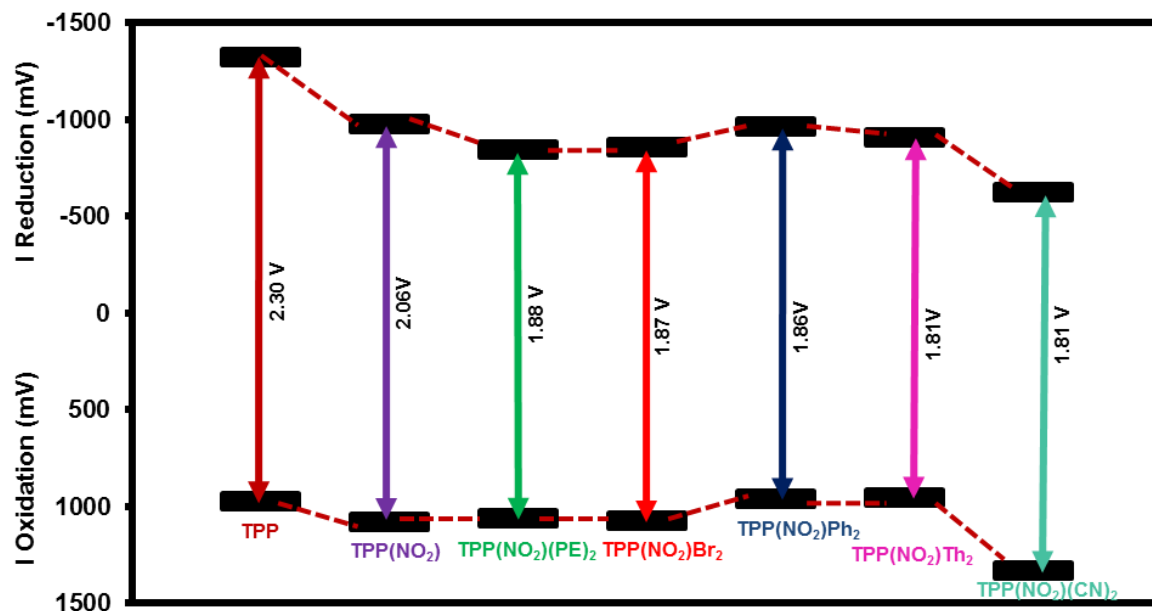

**Figure S38.** Plot of 1<sup>st</sup> ring redox potentials *versus* the Hammett parameter ( $\sigma_p$ ) of various Mixed substituted Porphyrins. (a) H<sub>2</sub>TPP(NO<sub>2</sub>)X<sub>2</sub>

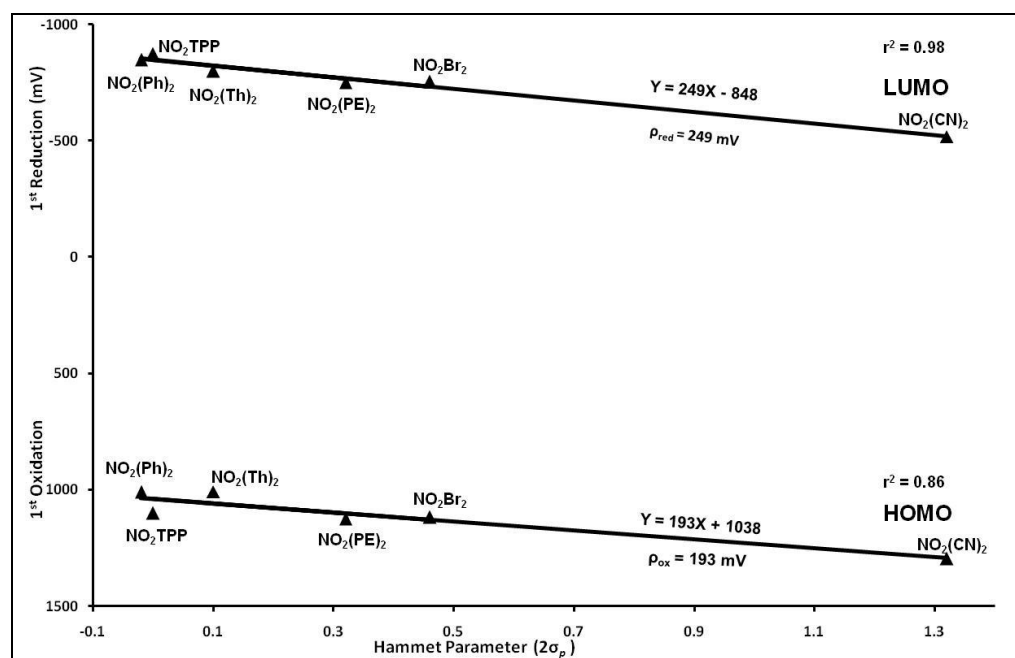

(b) CuTPP(NO<sub>2</sub>)X<sub>2</sub>

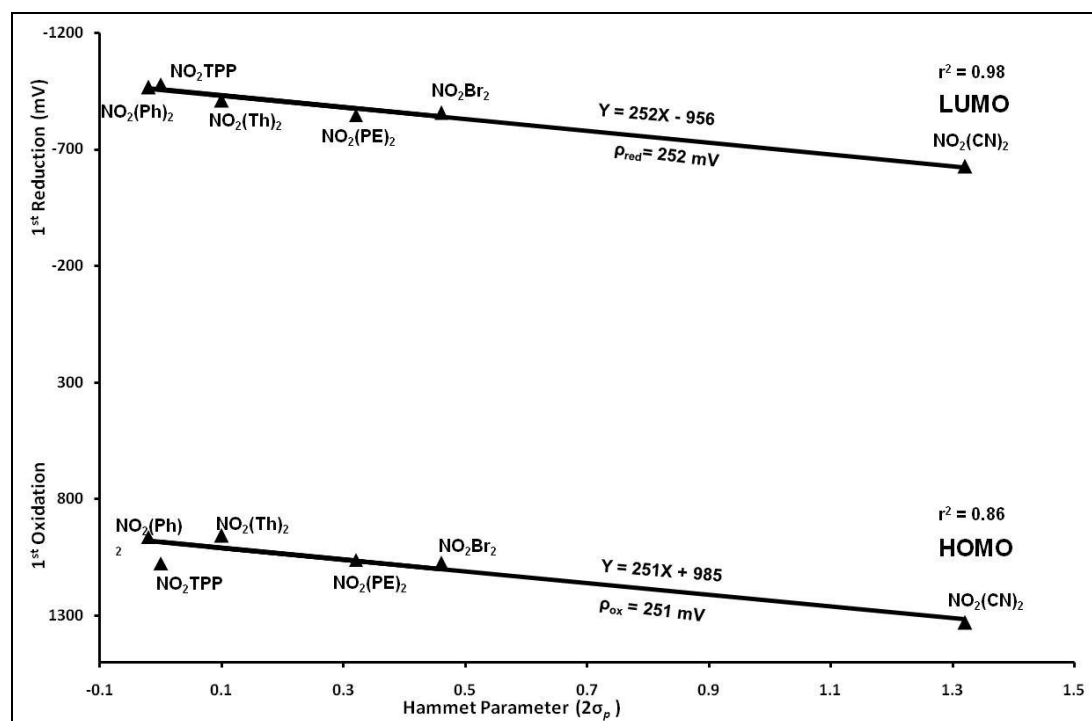

(c) NiTPP(NO<sub>2</sub>)X<sub>2</sub>

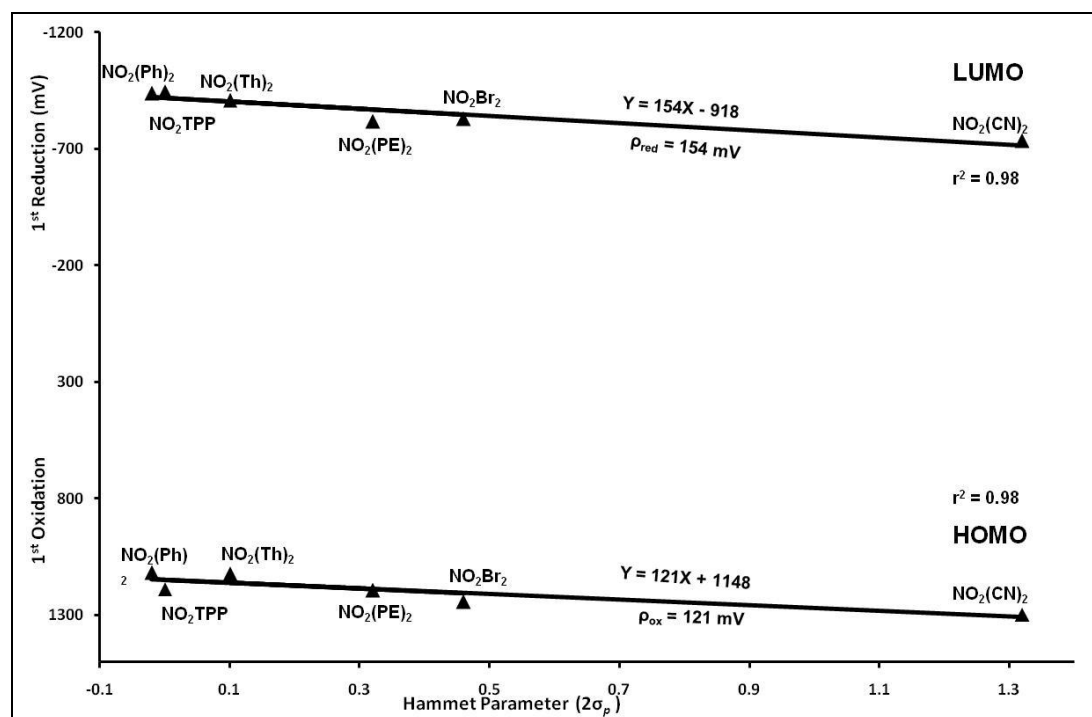



(d)  $\text{ZnTPP}(\text{NO}_2)\text{X}_2$

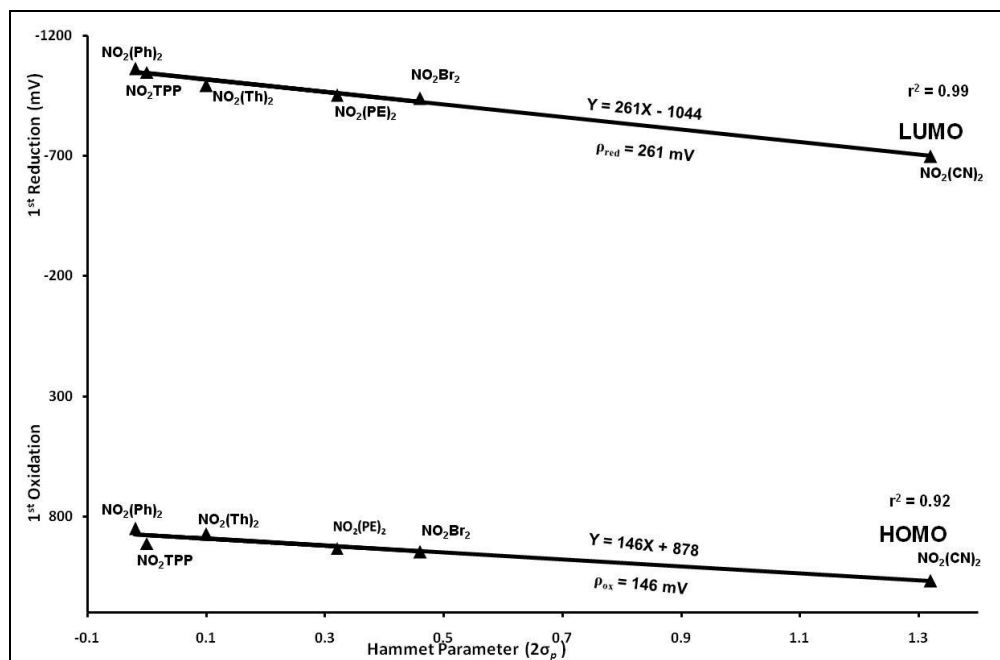

(e)  $\text{H}_2\text{TPP}(\text{NO}_2)\text{X}_6$

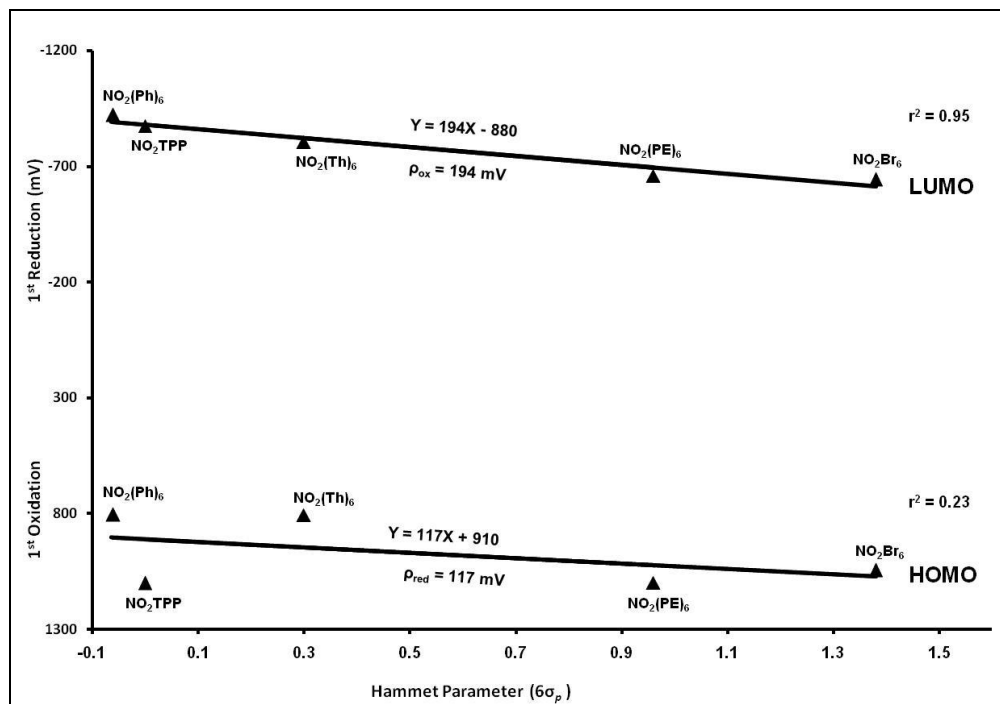

**(f) NiTPP(NO<sub>2</sub>)X<sub>6</sub>**

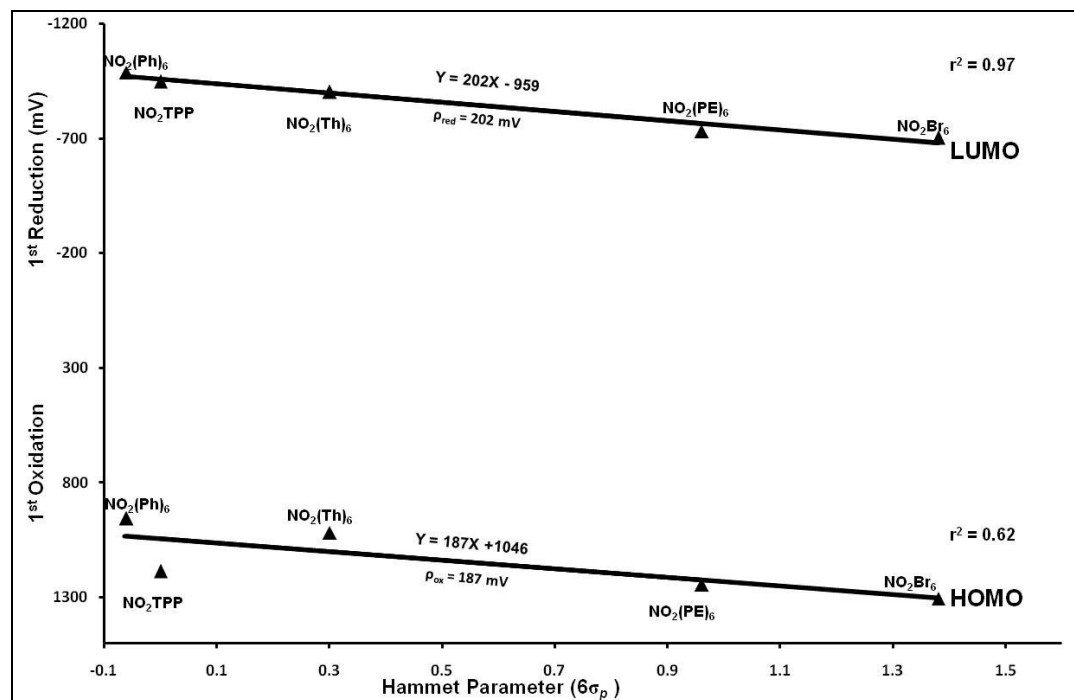

**(g) CuTPP(NO<sub>2</sub>)X<sub>6</sub>**

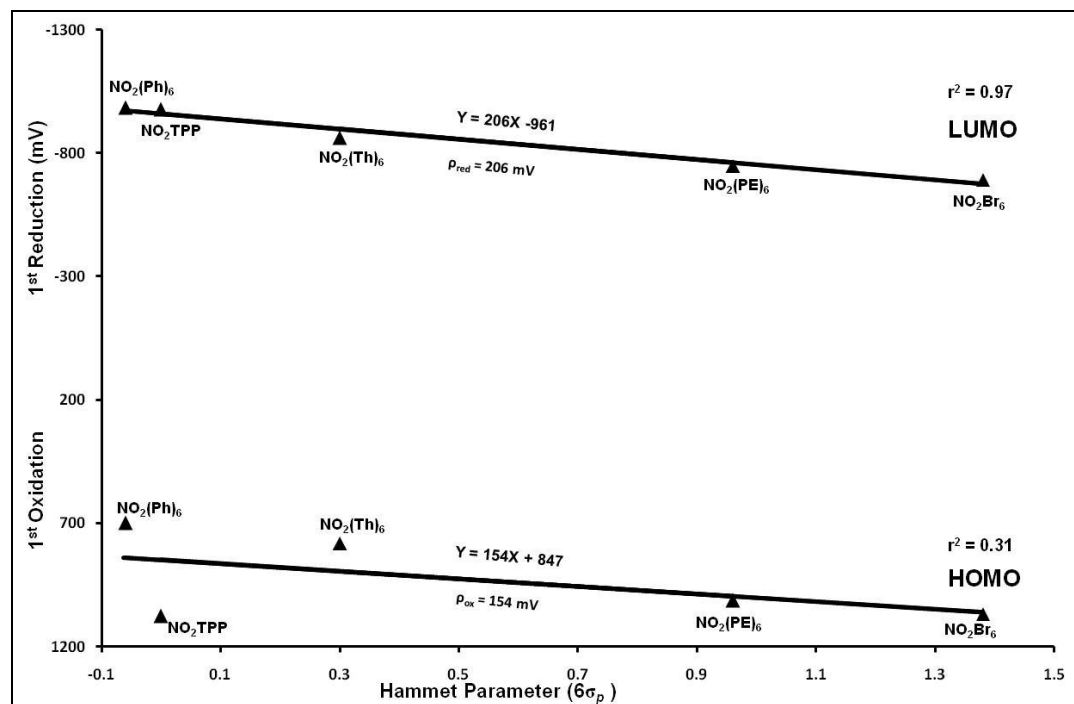

**(h) ZnTPP(NO<sub>2</sub>)X<sub>6</sub>**

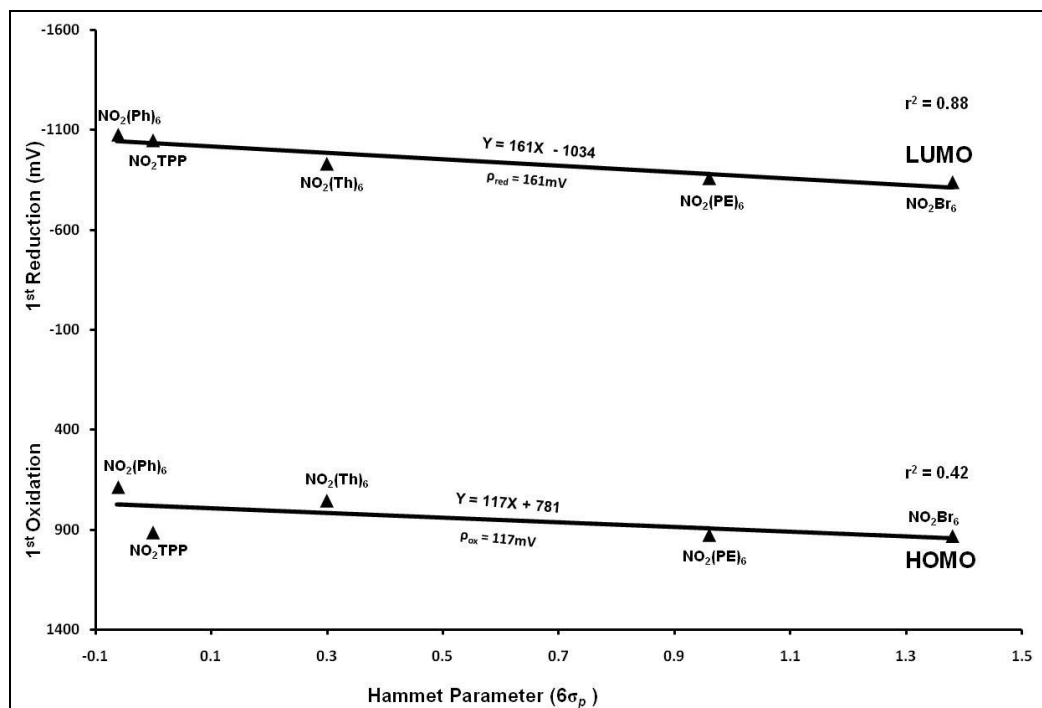

**(i) CoTPP(NO<sub>2</sub>)X<sub>6</sub> (metal centered)**

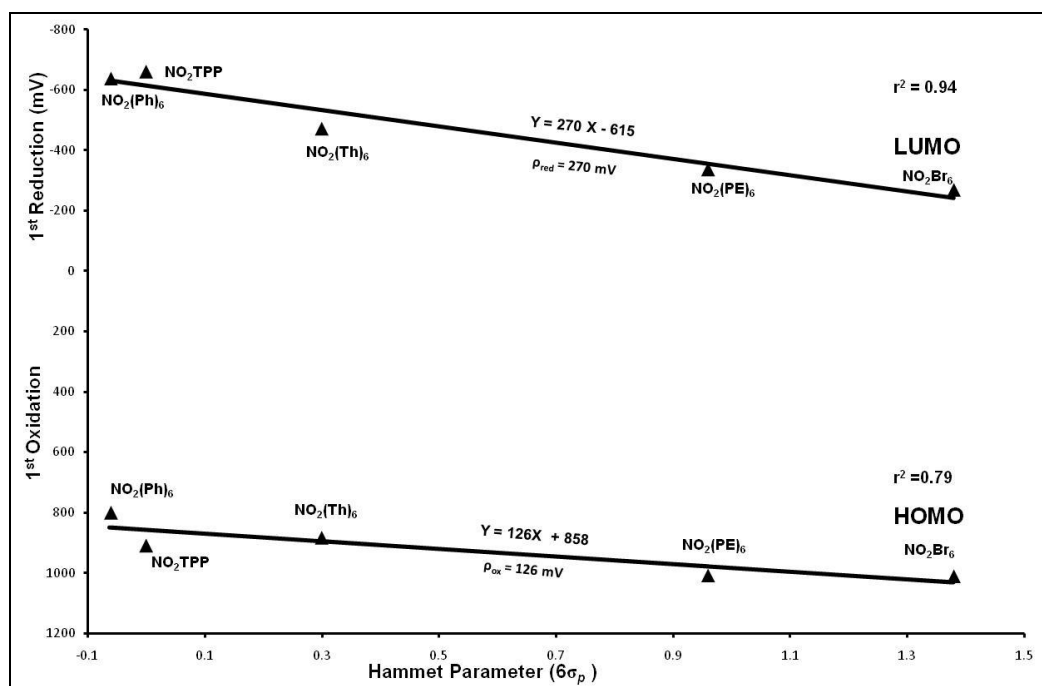

(j) CoTPP(NO<sub>2</sub>)X<sub>6</sub> (ring centered)

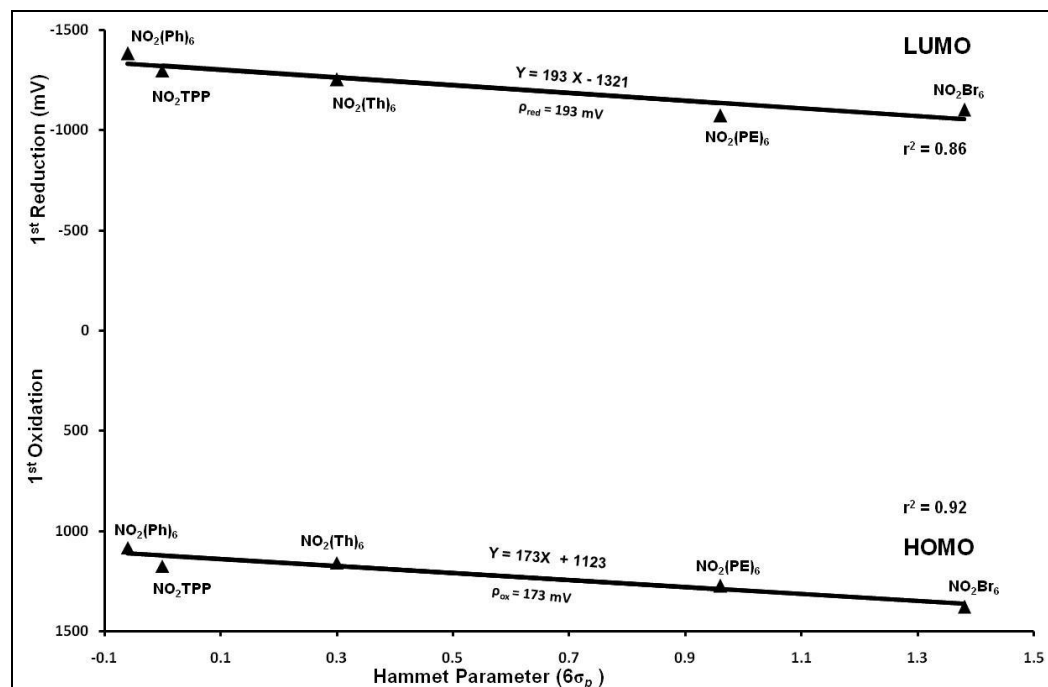

**References:**

1. Jaquinod, L.; Khoury, R. G.; Shea K. M.; Smith, K. M. *Tetrahedron* **1999**, 5, 13151-13158.
2. G. M. Sheldrick, SIR97 and SHELX97, Programs for Crystal Structure Refinement, University of Göttingen, Göttingen (Germany), 1997.
3. (a) Hill, A. V. *J. Physiol. London.* **1910**, 40, IV-VII. (b) Hunter, C. A.; Meah, M. N.; Sanders, J. K. M. *J. Am. Chem. Soc.* **1990**, 112, 5773-5780.
